# Supplementary material for: Exploring the Effect of Methyl Jasmonate on the Expression of microRNAs Involved in Biosynthesis of Active Compounds of Rosemary Cell Suspension Cultures through RNA-Sequencing
Source: MDPI journal article supplement (doi:10.3390/ijms23073704), 2022-03-28
Supplement: s1 [file s1]

## Supplementary Material

# Exploring the Effect of Methyl Jasmonate on the Expression of microRNAs Involved in Biosynthesis of Active Compounds of Rosemary Cell Suspension Cultures through RNA-Sequencing

Deheng Yao<sup>1,2</sup>, Yukun Chen<sup>1</sup>, Xiaoping Xu<sup>1</sup>, Yuling Lin<sup>1</sup>, and Zhongxiong Lai<sup>1,\*</sup>

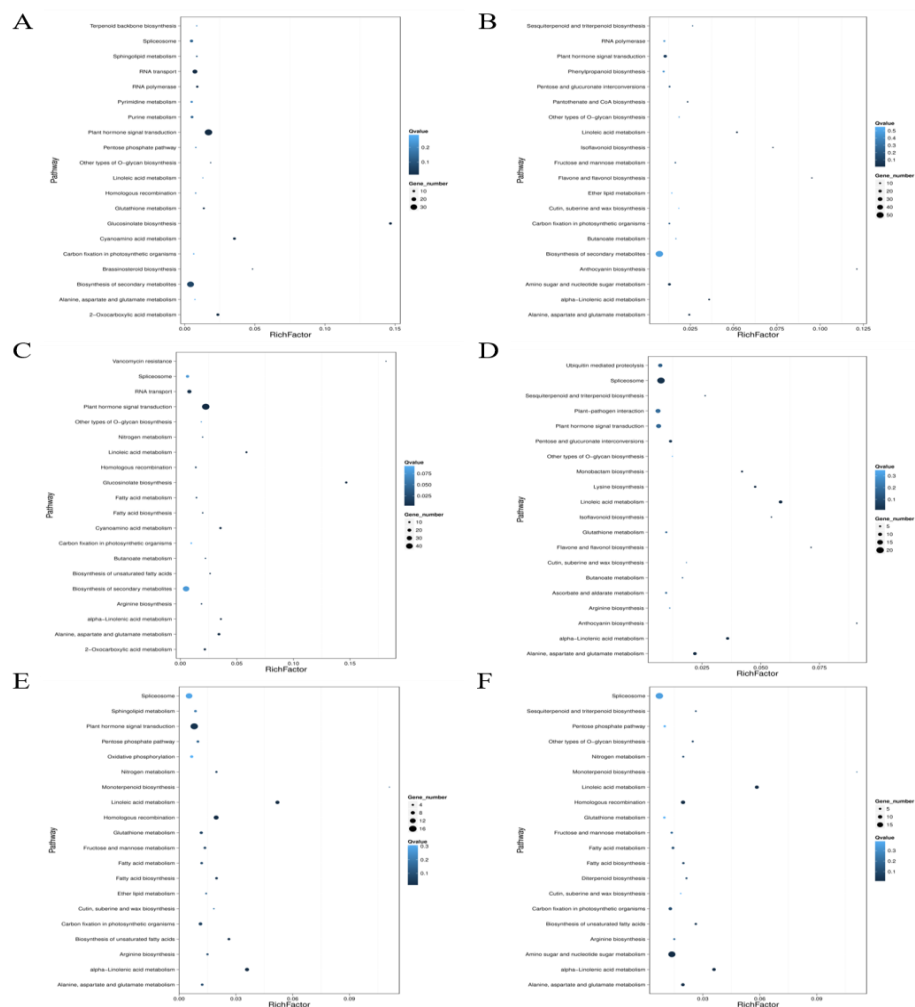

**Figure S1.** Top 20 enriched and regulated KEGG pathways. A, CKvsM10, B, CKvsM50, C, CKvsM100, D, M10vsM50, E, M10vsM100, F, M50vsM100.



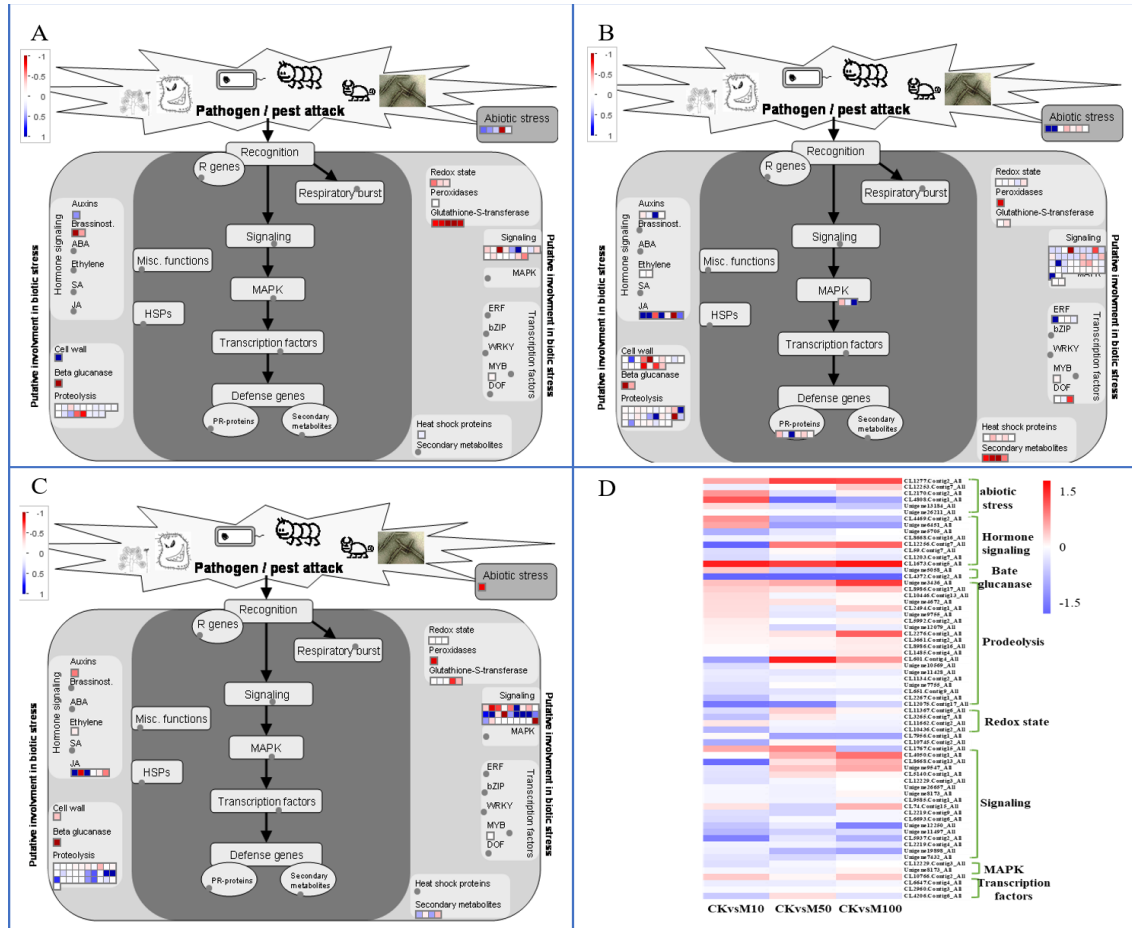

**Figure S3.** Abiotic stress in rosemary suspension cells under different concentrations of MeJA. A, Abiotic stress of differentially target genes in the CKvsM10; B, Abiotic stress of differentially target genes in the CKvsM50; C, Abiotic stress of differentially target genes in the CKvsM100; D, Heat maps of expression of differentially target genes under different concentrations of MeJA. A, B, and C: From the red to the blue corresponds to the numerical value of  $\log_2(\text{Relative expression})$  from the low to the high. D: From the red to the blue corresponds to the numerical value of  $\log_2(\text{Relative expression})$  from the high to the low

| <b>mobile phase gradient elution</b> |                          |                          |
|--------------------------------------|--------------------------|--------------------------|
| <b>Time ( min)</b>                   | <b>mobile phase A(%)</b> | <b>mobile phase B(%)</b> |
| <b>0</b>                             | <b>100</b>               | <b>0</b>                 |
| <b>2</b>                             | <b>100</b>               | <b>0</b>                 |
| <b>15</b>                            | <b>90</b>                | <b>10</b>                |
| <b>25</b>                            | <b>70</b>                | <b>30</b>                |
| <b>33</b>                            | <b>55</b>                | <b>45</b>                |
| <b>33.1</b>                          | <b>0</b>                 | <b>100</b>               |
| <b>38</b>                            | <b>0</b>                 | <b>100</b>               |
| <b>38.1</b>                          | <b>100</b>               | <b>0</b>                 |
| <b>45</b>                            | <b>100</b>               | <b>0</b>                 |

Figure S4. HPLC liquid phase conditions for amino acids determination

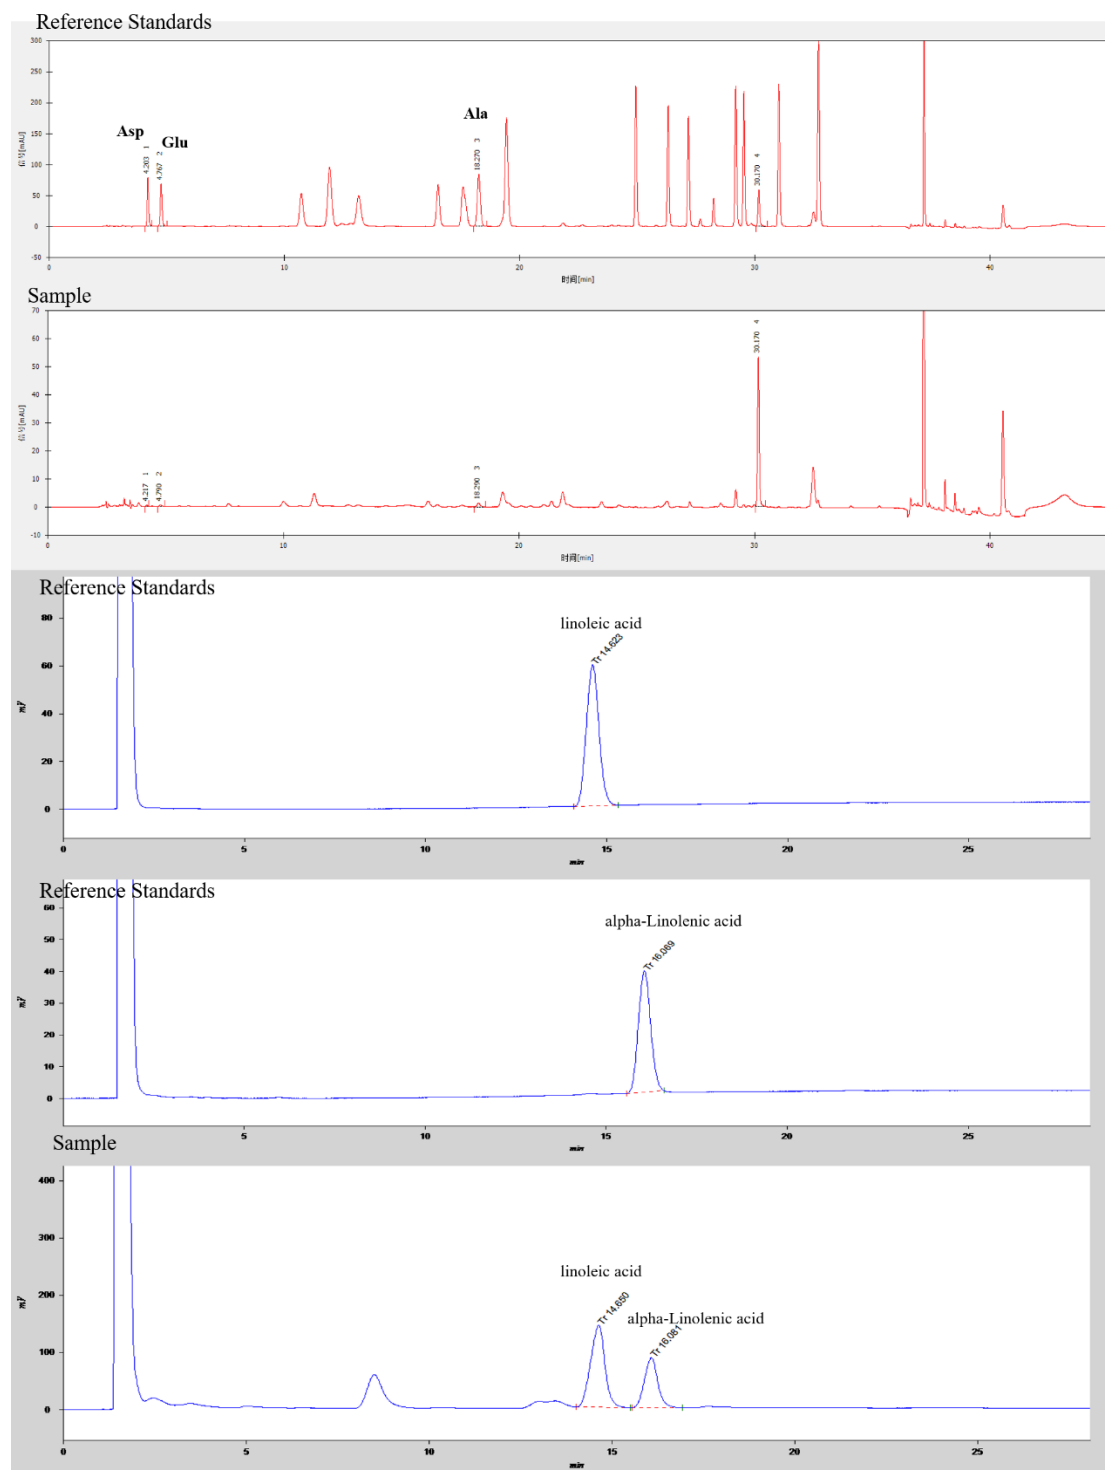

Figure S5. Chromatograms with standard compounds and sample

**Table S1.** Primers information used for real-time PCR analysis of rosemary genes

| <b>Gene name</b>       | <b>Primer sequences (5'-3')</b> |
|------------------------|---------------------------------|
| miR156a                | TGACAGAAGAGAGTGAGCACA           |
| miR156a-5p             | TGACAGAAGAGAGTGAGCAC            |
| miR160a-5p             | TGCCTGGCTCCCTGTATGCCA           |
| miR167d_1              | TGAAGCTGCCAGCATGATCT            |
| miR171b-3p             | TTGAGCCGTGCCAATATCAC            |
| miR171b-3p_3           | TTGAGCCGTGCCAATATCACG           |
| miR171d_1              | TTGAGCCGCGCCAATATCAC            |
| miR171f_3              | TTGAGCCGCGCCAATATCACT           |
| miR396a-3p_5           | TTCAATAAAGCTGTGGGAAG            |
| miR399b                | TGCCAAAGGAGAGTTGCCCTG           |
| miR6300                | GTCGTTGTAGTATAGTGG              |
| CL8954.Contig1_All-F   | TTCACCTGAATAGACCACACCG          |
| CL8954.Contig1_All-R   | CTTCTGATTGCTCCTCTGTGGT          |
| CL11742.Contig1_All-F  | ACGTTTTCGACGACAATGGA            |
| CL11742.Contig1_All-R  | TGCCGGAAGTTCCAAGTCTC            |
| CL9049.Contig3_All-F   | TCACCATCAGCAGCATCAACT           |
| CL9049.Contig3_All-R   | GGAGGCGATGACAGAAGAGAG           |
| CL1264.Contig2_All-F   | AGCACAGACCTTTGCATACGA           |
| CL1264.Contig2_All-R   | CACGTTTGTCTGTGCTGTGAG           |
| CL3157.Contig1_All-F   | GACTGGGAGAGCGTGCTATC            |
| CL3157.Contig1_All-R   | ATTTGGGAGCGTGGGCATAA            |
| CL10446.Contig22_All-F | GCCCAACTGAAGGAGCAGAT            |
| CL10446.Contig22_All-R | TTCTCATGCCAGCCGTTGAA            |
| CL5140.Contig4_All-F   | TCCTGGCTATGGAGTGAGCT            |
| CL5140.Contig4_All-R   | ATCCTTTTCTCGCTCACGA             |
| CL11662.Contig2_All-F  | CTGGCATCGTTGAGGACCTT            |
| CL11662.Contig2_All-R  | TGCGCTCCAACCGTAGAATT            |
| CL2063.Contig1_All-F   | CCCAACGTTGATCCACCTGA            |
| CL2063.Contig1_All-R   | TTTCTCCGGTTCGTGGACTG            |

**Table S2.** Rosmarinic acid contents of rosemary suspension cells under different MeJA concentrations

| MeJA concentrations ( $\mu\text{M}$ ) | Treatment time (h) | rosmarinic acid contents 1 ( $\text{mg} \cdot \text{g}^{-1} \text{DW}$ ) | rosmarinic acid contents 2 ( $\text{mg} \cdot \text{g}^{-1} \text{DW}$ ) | rosmarinic acid contents 3 ( $\text{mg} \cdot \text{g}^{-1} \text{DW}$ ) | Average rosmarinic acid contents ( $\text{mg} \cdot \text{g}^{-1} \text{DW}$ ) | STDEV | Duncan (5%) |
|---------------------------------------|--------------------|--------------------------------------------------------------------------|--------------------------------------------------------------------------|--------------------------------------------------------------------------|--------------------------------------------------------------------------------|-------|-------------|
| 0                                     | 48                 | 1.971                                                                    | 2.001                                                                    | 2.046                                                                    | 2.006                                                                          | 0.038 | d           |
| 10<br>50<br>100                       | 48                 | 2.158                                                                    | 2.223                                                                    | 2.199                                                                    | 2.194                                                                          | 0.033 | c           |
|                                       | 48                 | 2.954                                                                    | 2.798                                                                    | 3.043                                                                    | 2.932                                                                          | 0.124 | b           |
|                                       | 48                 | 3.288                                                                    | 3.159                                                                    | 3.428                                                                    | 3.292                                                                          | 0.134 | a           |
|                                       | 48                 | 2.746                                                                    | 2.695                                                                    | 2.542                                                                    | 2.661                                                                          | 0.106 | a           |

**Table S3.** Carnosic acid contents of rosemary suspension cells under different MeJA concentrations

| MeJA concentrations ( $\mu\text{M}$ ) | Treatment time (h) | Carnosic acid contents 1 ( $\text{mg} \cdot \text{g}^{-1} \text{DW}$ ) | Carnosic acid contents 2 ( $\text{mg} \cdot \text{g}^{-1} \text{DW}$ ) | Carnosic acid contents 3 ( $\text{mg} \cdot \text{g}^{-1} \text{DW}$ ) | Average Carnosic acid contents ( $\text{mg} \cdot \text{g}^{-1} \text{DW}$ ) | STDEV | Duncan (5%) |
|---------------------------------------|--------------------|------------------------------------------------------------------------|------------------------------------------------------------------------|------------------------------------------------------------------------|------------------------------------------------------------------------------|-------|-------------|
| 0                                     | 48                 | 1.501                                                                  | 1.537                                                                  | 1.468                                                                  | 1.502                                                                        | 0.034 | d           |
| 10                                    | 48                 | 1.642                                                                  | 1.669                                                                  | 1.681                                                                  | 1.664                                                                        | 0.020 | c           |
| 50                                    | 48                 | 2.115                                                                  | 2.228                                                                  | 2.183                                                                  | 2.175                                                                        | 0.057 | b           |
| 100                                   | 48                 | 2.746                                                                  | 2.695                                                                  | 2.542                                                                  | 2.661                                                                        | 0.106 | a           |

**Table S4.** Flavonoids contents of rosemary suspension cells under different MeJA concentrations

| MeJA concentrations<br>( $\mu\text{M}$ ) | Treatment time (h) | Flavonoids contents 1<br>( $\text{mg} \cdot \text{g}^{-1} \text{DW}$ ) | Flavonoids contents 2<br>( $\text{mg} \cdot \text{g}^{-1} \text{DW}$ ) | Flavonoids contents 3<br>( $\text{mg} \cdot \text{g}^{-1} \text{DW}$ ) | Average Flavonoids contents<br>( $\text{mg} \cdot \text{g}^{-1} \text{DW}$ ) | STDEV | Duncan (5%) |
|------------------------------------------|--------------------|------------------------------------------------------------------------|------------------------------------------------------------------------|------------------------------------------------------------------------|------------------------------------------------------------------------------|-------|-------------|
| 0                                        | 48                 | 14.891                                                                 | 15.608                                                                 | 14.433                                                                 | 14.977                                                                       | 0.592 | d           |
| 10                                       | 48                 | 15.607                                                                 | 17.219                                                                 | 17.060                                                                 | 16.629                                                                       | 0.888 | c           |
| 50                                       | 48                 | 19.050                                                                 | 18.413                                                                 | 18.573                                                                 | 18.679                                                                       | 0.331 | b           |
| 100                                      | 48                 | 20.522                                                                 | 20.383                                                                 | 21.578                                                                 | 20.828                                                                       | 0.653 | a           |

**Table S5.** GA contents of rosemary suspension cells under different MeJA concentrations

| MeJA concentrations<br>( $\mu\text{M}$ ) | Treatment time (h) | GA contents 1<br>( $\text{pmol/g FW}$ ) | GA contents 2<br>( $\text{pmol/g FW}$ ) | GA contents 3<br>( $\text{pmol/g FW}$ ) | Average GA contents<br>( $\text{pmol/g FW}$ ) | STDEV | Duncan (5%) |
|------------------------------------------|--------------------|-----------------------------------------|-----------------------------------------|-----------------------------------------|-----------------------------------------------|-------|-------------|
| 0                                        | 48                 | 0.389                                   | 0.457                                   | 0.620                                   | 0.489                                         | 0.119 | c           |
| 10                                       | 48                 | 0.636                                   | 0.756                                   | 0.688                                   | 0.694                                         | 0.060 | bc          |
| 50                                       | 48                 | 0.875                                   | 0.702                                   | 0.843                                   | 0.807                                         | 0.092 | ab          |
| 100                                      | 48                 | 0.776                                   | 0.765                                   | 0.792                                   | 0.777                                         | 0.014 | a           |

**Table S6.** ABA contents of rosemary suspension cells under different MeJA concentrations

| MeJA concentrations (μM) | Treatment time (h) | ABA contents 1 (ng/g FW) | ABA contents 2 (ng/g FW) | ABA contents 3 (ng/g FW) | Average ABA contents (ng/g FW) | STDEV  | Duncan (5%) |
|--------------------------|--------------------|--------------------------|--------------------------|--------------------------|--------------------------------|--------|-------------|
| 0                        | 48                 | 1090.825                 | 1278.482                 | 1187.879                 | 1185.729                       | 93.847 | a           |
| 10                       | 48                 | 1044.542                 | 1038.090                 | 1102.606                 | 1061.746                       | 35.532 | ab          |
| 50                       | 48                 | 962.915                  | 1120.559                 | 996.856                  | 1026.776                       | 82.972 | ab          |
| 100                      | 48                 | 978.062                  | 905.972                  | 1091.106                 | 991.7132                       | 93.319 | ab          |

**Table S7.** IAA contents of rosemary suspension cells under different MeJA concentrations

| MeJA concentrations (μM) | Treatment time (h) | IAA contents 1 (μmol/g FW) | IAA contents 2 (μmol/g FW) | IAA contents 3 (μmol/g FW) | Average IAA contents (μmol/g FW) | STDEV | Duncan (5%) |
|--------------------------|--------------------|----------------------------|----------------------------|----------------------------|----------------------------------|-------|-------------|
| 0                        | 48                 | 0.155                      | 0.1185                     | 0.120                      | 0.131                            | 0.021 | b           |
| 10                       | 48                 | 0.179                      | 0.1467                     | 0.153                      | 0.159                            | 0.018 | ab          |
| 50                       | 48                 | 0.172                      | 0.144                      | 0.192                      | 0.169                            | 0.024 | ab          |
| 100                      | 48                 | 0.1645                     | 0.1893                     | 0.218                      | 0.191                            | 0.027 | a           |

**Table S8.** JA contents of rosemary suspension cells under different MeJA concentrations

| MeJA concentrations (μM) | Treatment time (h) | JA contents 1 (pmol/g FW) | JA contents 2 (pmol/g FW) | JA contents 3 (pmol/g FW) | Average JA contents (pmol/g FW) | STDEV | Duncan (5%) |
|--------------------------|--------------------|---------------------------|---------------------------|---------------------------|---------------------------------|-------|-------------|
| 0                        | 48                 | 12.214                    | 16.043                    | 11.391                    | 13.216                          | 2.483 | b           |
| 10                       | 48                 | 13.782                    | 16.941                    | 14.413                    | 15.045                          | 1.671 | ab          |
| 50                       | 48                 | 22.061                    | 16.895                    | 19.798                    | 19.58                           | 2.589 | a           |
| 100                      | 48                 | 21.424                    | 17.089                    | 16.901                    | 18.472                          | 2.559 | a           |

**Table S9.** SA contents of rosemary suspension cells under different MeJA concentrations

| MeJA concentrations (μM) | Treatment time (h) | SA contents 1 (μg/g FW) | SA contents 2 (μg/g FW) | SA contents 3 (μg/g FW) | Average SA contents (μg/g FW) | STDEV | Duncan (5%) |
|--------------------------|--------------------|-------------------------|-------------------------|-------------------------|-------------------------------|-------|-------------|
| 0                        | 48                 | 73.763                  | 56.634                  | 69.697                  | 66.698                        | 8.949 | a           |
| 10                       | 48                 | 61.880                  | 68.749                  | 55.349                  | 61.992                        | 6.701 | a           |
| 50                       | 48                 | 45.024                  | 43.867                  | 45.910                  | 44.934                        | 1.025 | b           |
| 100                      | 48                 | 35.102                  | 44.478                  | 53.727                  | 44.435                        | 9.312 | b           |

**Table S10.** Alanine contents of rosemary suspension cells under different MeJA concentrations

| MeJA concentrations (μM) | Treatment time (h) | Alanine contents 1 (μg/g FW) | Alanine contents 2 (μg/g FW) | Alanine contents 3 (μg/g FW) | Average Alanine contents (μg/g FW) | STDEV | Duncan (5%) |
|--------------------------|--------------------|------------------------------|------------------------------|------------------------------|------------------------------------|-------|-------------|
| 0                        | 48                 | 19.634                       | 20.024                       | 21.123                       | 20.260                             | 0.772 | c           |
| 10                       | 48                 | 10.635                       | 10.212                       | 9.700                        | 10.182                             | 0.468 | d           |
| 50                       | 48                 | 28.577                       | 28.175                       | 29.504                       | 28.752                             | 0.681 | b           |
| 100                      | 48                 | 33.413                       | 33.037                       | 34.014                       | 33.488                             | 0.493 | a           |

**Table S11.** Glutamate contents of rosemary suspension cells under different MeJA concentrations

| MeJA concentrations (μM) | Treatment time (h) | Glutamate contents 1 (μg/g FW) | Glutamate contents 2 (μg/g FW) | Glutamate contents 3 (μg/g FW) | Average Glutamate contents (μg/g FW) | STDEV | Duncan (5%) |
|--------------------------|--------------------|--------------------------------|--------------------------------|--------------------------------|--------------------------------------|-------|-------------|
| 0                        | 48                 | 21.251                         | 20.373                         | 19.293                         | 20.306                               | 0.981 | c           |
| 10                       | 48                 | 18.123                         | 17.471                         | 17.334                         | 17.643                               | 0.422 | d           |
| 50                       | 48                 | 22.146                         | 21.539                         | 22.529                         | 22.071                               | 0.499 | b           |
| 100                      | 48                 | 44.515                         | 43.054                         | 43.092                         | 43.554                               | 0.833 | a           |

**Table S12.** Aspartate contents of rosemary suspension cells under different MeJA concentrations

| MeJA concentrations (μM) | Treatment time (h) | Aspartate contents 1 (μg/g FW) | Aspartate contents 2 (μg/g FW) | Aspartate contents 3 (μg/g FW) | Average Aspartate contents (μg/g FW) | STDEV | Duncan (5%) |
|--------------------------|--------------------|--------------------------------|--------------------------------|--------------------------------|--------------------------------------|-------|-------------|
| 0                        | 48                 | 10.584                         | 10.806                         | 11.634                         | 11.008                               | 0.554 | a           |
| 10                       | 48                 | 5.637                          | 5.899                          | 6.026                          | 5.854                                | 0.198 | c           |
| 50                       | 48                 | 5.487                          | 5.275                          | 5.389                          | 5.384                                | 0.106 | d           |
| 100                      | 48                 | 10.581                         | 10.812                         | 10.628                         | 10.674                               | 0.122 | ab          |

**Table S13.** linoleic acid contents of rosemary suspension cells under different MeJA concentrations

| MeJA concentrations (μM) | Treatment time (h) | linoleic acid contents 1 (mg/g DW) | linoleic acid contents 2 (mg/g DW) | linoleic acid contents 3 (mg/g DW) | Average linoleic acid contents (mg/g DW) | STDEV | Duncan (5%) |
|--------------------------|--------------------|------------------------------------|------------------------------------|------------------------------------|------------------------------------------|-------|-------------|
| 0                        | 48                 | 5.456                              | 5.464                              | 5.481                              | 5.467                                    | 0.013 | b           |
| 10                       | 48                 | 4.514                              | 4.593                              | 4.668                              | 4.591                                    | 0.077 | d           |
| 50                       | 48                 | 25.483                             | 25.684                             | 25.870                             | 25.679                                   | 0.193 | a           |
| 100                      | 48                 | 5.353                              | 5.385                              | 5.414                              | 5.384                                    | 0.030 | c           |

**Table S14.** alpha-Linolenic acid contents of rosemary suspension cells under different MeJA concentrations

| MeJA concentrations (μM) | Treatment time (h) | alpha-Linolenic acid contents 1 (mg/g DW) | alpha-Linolenic acid contents 2 (mg/g DW) | alpha-Linolenic acid contents 3 (mg/g DW) | Average alpha-Linolenic acid contents (mg/g DW) | STDEV | Duncan (5%) |
|--------------------------|--------------------|-------------------------------------------|-------------------------------------------|-------------------------------------------|-------------------------------------------------|-------|-------------|
| 0                        | 48                 | 3.525                                     | 3.515                                     | 3.413                                     | 3.484                                           | 0.062 | c           |
| 10                       | 48                 | 3.370                                     | 3.569                                     | 3.450                                     | 3.463                                           | 0.100 | cd          |
| 50                       | 48                 | 21.809                                    | 22.043                                    | 22.160                                    | 22.004                                          | 0.179 | a           |
| 100                      | 48                 | 4.504                                     | 4.584                                     | 4.646                                     | 4.578                                           | 0.071 | b           |

**Table S15.** Summary statistics of small RNA libraries.

| Library | Raw reads  | Clean Reads | Percentage of clean (%) | Mapped rsads | Percentage (%) |
|---------|------------|-------------|-------------------------|--------------|----------------|
| CK      | 35,202,242 | 30,808,982  | 87.52                   | 16,669,449   | 54.11          |
| M10     | 34,995,702 | 31,400,940  | 89.73                   | 17,162,631   | 54.66          |
| M50     | 32,667,184 | 19,653,455  | 86.74                   | 11,083,865   | 58.86          |
| M100    | 32,667,184 | 29,666,471  | 90.81                   | 17,462,009   | 56.40          |

**Table S16.** Summary of detected miRNAs for each sample.

| Sample name                 | CK    | M10   | M50   | M100  |
|-----------------------------|-------|-------|-------|-------|
| Total Known miRNA count     |       |       | 69    |       |
| Total novel miRNA count     |       |       | 181   |       |
| Known miRNA count           | 56    | 53    | 57    | 53    |
| Known miRNA precursor count | 45    | 53    | 46    | 51    |
| Novel miRNA count           | 178   | 178   | 178   | 172   |
| Novel siRNA count           | 16683 | 15765 | 16570 | 13434 |

Table S17 The information of mature novel miRNAs and their precursor

| miRNA id   | Sequence(mature)              | Sequence(precursor)                                                                                                                                                                                                        |
|------------|-------------------------------|----------------------------------------------------------------------------------------------------------------------------------------------------------------------------------------------------------------------------|
| novel_mir1 | CAAAAAGGAAAGT<br>AGGACATTTGTA | AAGTACTCCCTCCGTCCCATTAACTGTCCCCTTTCTTTTGGGCACGGGTATTTAGGAGATAAGTATA<br>AAGTAGTTAAAGTGATAAAAAGTTGGTAGGGTCCACACTTTTGAAGGGATAATTACTTCCTAAAAT<br>GGAATGAGACATTTGTAATGGGACAACCCAAAAAGGAAAGTAGGACATTTGTAATGGGACAGAGG<br>GAGTATTA |
| novel_mir2 | ACGTTTTAAGTGGG<br>ACGGAGGGAG  | TTATTCCCTCTGTCCCATTAAATGTCCTACTTTCTTTTGGGTTGTCCCATTACAAATGTCTCATTC<br>CATTTTAGGAAGTAATTATCCCTTCAAAAAATGTGGACCCTACCTACTTTTAACTTTAACTACTTT<br>ATACCTTTCTCCTAAATAACCGTGTCCAAAAGAAAGGGGACGTTTTAAGTGGGACGGAGGGAGTAT             |
| novel_mir3 | ATGGGATTAAGGTA<br>GTGCATTATAA | ATTATATTTATGGTATATGCATAGATCCTTCCATATAAGATTATGGTAATAATCCTGAGAGTATGGTAA<br>TAATCCTAGGAGTATGGTAATTTCCATATAGGATTATGGTAATATTCCATATAGGATTATGGTAATTTCC<br>ATATGGGATTAAGGTAGTGCATTATAAATATAAG                                      |
| novel_mir4 | CAAAAGAAATAGG<br>ACACTT       | ATACTCCATCTGTCCCATTAAATGTCCTACTTTTCTTTTGGGTTGTCTTATTACAAATGTCTCATTC<br>CATTTTAGGAATAATTATCCCTTCAAAAAGTGTGGGTCTACTCAATTTAACACTTTAGCTATTTTA<br>TACCTTTCTCCTAAATACTCGTGCCCAAAAGAAATAGGACACTTTAGGCGGGACGGAGGGAGTAC             |
| novel_mir5 | CGGTGGTAGAGTTA<br>TTGATCCA    | TCCAATAACCACCGTAGCTTCGGAGTCTGCATTTAGTGCCGGTGGTAGAGTTATTGATCCACATCGAG<br>CCTCTCTAGCAGTAGACACGGTTCAAATGCTACTTTGTGCGGGAGATTGGT                                                                                                |

|                 |                                        |                                                                                                                                                                                                                                                                                                                       |
|-----------------|----------------------------------------|-----------------------------------------------------------------------------------------------------------------------------------------------------------------------------------------------------------------------------------------------------------------------------------------------------------------------|
| novel_mir6      | ACACTTTTTGAAGG<br>GATAATTA             | CGTCCCATTAAAGTGTCTCTTTTATTTTGGGCACGGGTATTTAGGAGATATGTATAAAGTAGTTAAAG<br>TGATAAAAAGTGGGTAGGGCCCACTTTTTGAAGGGATAATTACTTCCTAAAATGGAATGAGACAT<br>TTGTAATGGGACA                                                                                                                                                            |
| novel_mir7      | ATAACATAAAATCG<br>ATCGATCAGTTTT        | TGAATGAAATAACATAAAATCGATCGATCAGTTTTACGCTAATCTCGACCGGTATTATGCTAATTTTGT<br>TGGTTTTATCTATTTTACGTAAATCCAATTGAATTAGCATAAAACTGATCGATCGGCTTTATGTTATTTC<br>ATTTT                                                                                                                                                              |
| novel_mir8      | TTAATGTTAATAAA<br>GTAGGAGAGAGAA<br>ATA | ATAATACTCCCTCCGTCCCGGCCCAATTGGCACAACACTTTTTGCACAAATATTAAGAAAAAATGGG<br>TTAAGGGGTTTAATGGTGTGGTCCCACAAGATTTAATGTTAATAAAGTAGGAGAGAGAAATAGAAT<br>TGGAGAGAGAAAGAGAGAGTAGAATATAGAGAGACATGATTGGAGAGAGACATAGTAGATTAAGG<br>GATTTAATTTTTGCCATTTTTGGCATGTGCCAATTGGATTGGGACAGCCCAATTTGGCAAGTGTGCCA<br>ATTGGGCTGGGACGGAGGGAGTATTAC |
| novel_mir9      | AGGGGCGACATGA<br>GAACATAT              | TGAAATCCAGCAGGGGCGACATGAGAACATATAATTGATATGTCGTCATCTTATATGTTCTCAGGTCG<br>CCCCTGTAGGATTCT                                                                                                                                                                                                                               |
| novel_mir1<br>0 | ATTGAGTGCAGCGT<br>TGATGACATCGTCA<br>T  | GGTTAAAAACCTCATTGAGTGCAGCGTTGATGACATCGTCATTTCGTCCTTCTCCTTCGTCTCCGGATG<br>TCGTTTCATTGATGCTGCACTCAATGACGTTTTTAATTT                                                                                                                                                                                                      |
| novel_mir1<br>1 | AATACATGTCATCTT<br>GGGTGGAAC TGAA      | CTTTTTCAGTTCATCTTGGATGGGACAACCCAAAAAGGAATACATGTCATCTTGGGTGGAAC TGAA<br>AAC                                                                                                                                                                                                                                            |
| novel_mir1<br>2 | CCGGAACCGTTGTT<br>TTAAAATTTAATG        | GTGGATATGTAATGCTCAATTTTAAAAAAAAAAAAAAAAAAAAAAAAAACTGACCGGGTCGGACCGG<br>AACCGGACAAAACGGGTCTTGACCGGTCCGGGTCCAAGCGTTTTGGAACCGGAACCGAA<br>ACCGGAACCGTTGTTTTAAATTTAATGGGTTTGAACGGTCCGGATCGGTCCGGGTAAAGACCGC<br>CCGTTGACATCCCTAGTTACAACAATTCAA                                                                              |

|                 |                                        |                                                                                                                                                                                                                                                                                                                      |
|-----------------|----------------------------------------|----------------------------------------------------------------------------------------------------------------------------------------------------------------------------------------------------------------------------------------------------------------------------------------------------------------------|
| novel_mir1<br>3 | TTGGAGGTCCTCGG<br>TCAGGTCATCCCGG<br>GG | CGCCGGGCCCTGGGTGCCGACCTGGATGACCCTCGAGGGATCGTCGTCGTATAGTTGGAGGTCCTCG<br>GTCAGGTCATCCCGGGGTGTCGGCCTCCGGGGGCTCGGTA                                                                                                                                                                                                      |
| novel_mir1<br>4 | GAATATGCTATGAA<br>AGTAAATGAATA         | AATATATATATATAGGGGAGGGTTAACGTAAAAACCATTTTTATTGTGCGAACGTGAGAACTGAATAT<br>GCTATGAAAGTAAATGAATACACTGCGAAAAGTTAATGAATAAAAAAAAAATAGAATTTTCGCCTCTCA<br>TGGGATTCTGAACCCTGGTGAAAATTCCGAATTTTTGGATTCATTAACCTTCGCAGAGTATTCATTAAC<br>TTCATAGCATATTCATTTTGTTCGTAGTTCTTAGTTCTCACGTAAAAATTGGTTCTTATTTGAACCAA<br>ACTCTATATATATATATA |
| novel_mir1<br>5 | GTAGTTAAAGTGTT<br>AAAAAGTGGG           | ATACTCCCTCCGTCCACCTAAATGTCCCATTTCTTTTGGGCACGGGTATTTAGGAGAAAGGTATAAA<br>GTAGTTAAAGTGTTAAAAAGTGGGTAGGGTCCACACTTTTTGAAGGGATAATTATTTCTTAAATGG<br>AATGGGACATTTGTAATGGGACAACCCAAAAAGGAAAGTATGACATTTTAAATGGGACAGAGGGAG<br>TAA                                                                                               |
| novel_mir1<br>6 | ACCCATCCATTGAC<br>GAGCCAAAGT           | TAGTTGATGGTCCTGGTCCGGTCTGGATTCAATGTCTAATGGATCGGATCCAGAACCAGAACCATTAC<br>TTATTTATTGGTTCTGGTTCGGGTAAAACCCATCCATTGACGAGCCAAAGTTTAAATAGGCTTGTCAA<br>TGAGCTAGTTTTATCCATATCAATTC                                                                                                                                           |
| novel_mir1<br>7 | AAATGGAATGAGA<br>CATTCATAATGGGA<br>CAA | ATTACTCCCTCCGTCCCATTTAATGTGTCTCATTTCTTTTAGGCACGGGTAATTAGGAGAAGGGTATAA<br>AGCAATTAAGGAGTAAAAAGTGGGTATGGCCCATACTTTTTGAAGGAATAATTATTTCTTAAATGG<br>AATGAGACATTCATAATGGGACAACCCAAAAAGGAAAGTATGACATTTTAAATGGGATGGAGTAAG                                                                                                    |

|                 |                                       |                                                                                                                                                                                                                                                                                                                                                                                                                                                                                                                                                                                                                             |
|-----------------|---------------------------------------|-----------------------------------------------------------------------------------------------------------------------------------------------------------------------------------------------------------------------------------------------------------------------------------------------------------------------------------------------------------------------------------------------------------------------------------------------------------------------------------------------------------------------------------------------------------------------------------------------------------------------------|
| novel_mir1<br>8 | CTGTTTTGTGCATTA<br>TCTTCAACGTCTTAT    | GTGAGAACTAAGAACCATGCATAAGACGTTGAAGATGATGCACAAGATGATATAAAGTTGTGCATA<br>ACGAAAACCTTTATAAAATTATTTTGTGGGCAACAATTTTAGAAAGTTTCGTTATGCACAACCTTTATA<br>CTGTTTTGTGCATTATCTTCAACGTCTTATGCATGGTTCTCAAATTCTCAA                                                                                                                                                                                                                                                                                                                                                                                                                          |
| novel_mir1<br>9 | TTTCATAGCATATTC<br>ATTTTGTTCGTAA      | CGTGAGAACCATTTTTATTGTGAGAACATGAGAAATGAATATGCTATGAAAGTTAATGAATACGCTGC<br>GAAAGTTAATGAATAAAAAAAAAATAGAATTTTCGCCTCTCATGGGATTCGAACCCTGGTGAAAATTC<br>CGAATTTTGGATTCATTAACCTTCGCAGAGTATTCATTAACCTTCATAGCATATTCATTTTGTTCGTAA<br>AGAATTTTCGTAGTTCTTAGTTCTCACGTTAAAATTGGTTCTTATT                                                                                                                                                                                                                                                                                                                                                     |
| novel_mir2<br>0 | TTAATGAATACTCTG<br>CGAAAG             | TTTAACGTGAGAACTAAGA ACTACGAAAATTCTTTACGAACAAAATGAATATGCTATGAAAGTTAAT<br>GAATACTCTGCGAAAGTTAATGAATCCAAAAATTCCGAATTTTCACCAGGGTTCGAATCCCATGAGA<br>GGCGAAAATTCTATTTTTTTTATTTCATTAACCTTCGCAGCGTATTCATTAACCTTCATAGCATATTCATT<br>TCTCATGTTCTCACAATAAAAATGGTTCTCACGTTAAC                                                                                                                                                                                                                                                                                                                                                            |
| novel_mir2<br>1 | TGAGAACCATGCAT<br>AAGACGTTGAAGAT<br>A | ACTACATACTTCTCAATTCTTAGAACTTATCTGCGGGCTTGTTTTGTATTGCAATTTGTATTCTTCGAAT<br>GCATGTTAGTCTAGATGAAAGGATAAAACCTACTTAAATGCAATATTGCAGTTGTTTGGAGATGAGTT<br>TGTTAATTATATATATATATATAGGGGTGGATCCAGTAAGAACTCATCTTTTTTGAGAATTTGAGAAC<br>CATGCATAAGACGTTGAAGATAATGCACAAAACAGTATAAAGTTGTGCATAACGAAAACCTTTATAAA<br>ATTATTTTGTGGGCAACAATTTTAGAATGTTTTCGTTATGCACAACCTTTATACTGTTTTGTGCATTATC<br>TTCAACGTCTTATGCATGGTTCTCAAATTCTCAAAAAAGATGAGTTCTTACTGGATCCAACCCCTATA<br>TATATATATATAATTAACAACTCATCTCCAAACAACCTGCAATATTGCATTAAAGTAGGTTTTATCCTTT<br>CATCTAGACTAACATGCATTTCGAAGAATACAAATTCGAATACAAAACAAGCCCGCAGATAAGTTCTA<br>AGAATTGAGAAGTATGTAGTT |

|                 |                                |                                                                                                                                                                                                                                                                                                                                                                                                    |
|-----------------|--------------------------------|----------------------------------------------------------------------------------------------------------------------------------------------------------------------------------------------------------------------------------------------------------------------------------------------------------------------------------------------------------------------------------------------------|
| novel_mir2<br>2 | CAGTGGCGGAGCC<br>ACGTTGGGGCCT  | TACAGACAGTGGCGGAGCCACGTTGGGGCCTGGGGGGCCCTTGGGCCCCCAGAATTTTATTATT<br>AGTAGTATATATTACAGTAAATAGACAAAGACTTCAATGTAGTTCAGTTGGTTTTGTT                                                                                                                                                                                                                                                                     |
| novel_mir2<br>3 | CGCCGAGGACTACC<br>CAGATCTGGACA | GGCCGAGGCGGCGAGGGCCGAGGTTGCCTCGATGAAGGCTGAGGTGGAACAGGTTCCCGTCGGG<br>AGGCGGACATGGCGAGCTCTCAGGGAGAAACGCTTCGCGCCTTCGCGGAGAGGCTGTTCTGTCTCGG<br>CGGGCTTCTCGGGGATGGTCTCGGACGCGGCTGATGTGCTTAACAAGCGCGCCGTCTCGGACGCAA<br>TCGAAGAGGTGCGCCGAGGACTACCCAGATCTGGACAAAGCCAAGTATGGGTACGAGGAGACCGAG<br>GATGCTGTCTTGAGACGGGCCTACTTTGATGTGCTCGTCCGCGGCCTGAAGGAGCTTCCCGTGCTGC<br>AGAACCTTGCCTCCTCCTCGGTT              |
| novel_mir2<br>4 | TCGCCGAGGACTAC<br>CCAGACCT     | GAGGAGGCGGCAAGGGCCGAGGCGGCGAGGGCCGAGGTTGCCTCGATGAAGGCTGAGGTGGAAC<br>AGGTTCCCGTCGGGAGGCGGACATGGCGAGCTCTCAGGGAGAAACGCTTCGCGCCTTCGCGGAG<br>AGGCTGTTCTGTCTCGGCGGGCTTCTCGGGGATGGTCTCGGACGCGGCTGATGTGCTTAACAAGCGCG<br>CCGTCTCGGACGCAATCGAAGAGGTGCGCCGAGGACTACCCAGACCTGGACAAAGCCAAGTATGGG<br>TACGAGGAGACCGAGGATGATGTCCTGAGACGGGCCTATTTTATGATGTGCTCGTCCGCGGCCTGAAGG<br>AGCTTCCCGTGCTGCAGAACCTTGCCTCCTCCTCG |
| novel_mir2<br>5 | ATTTTAAAGCAACG<br>GTTCCGGTT    | GGGGTTGTCTCTAGTAGGGATGTCAACGGGCGGTCTTTACCCGGATCGATCCGGAACCGTTCAAAGC<br>CCATTAAATTTTAAAGCAACGGTTCCGGTTCTGGTTCTAGAACCGCTTGGACCCGGACCAAGT<br>TCAGACCCGGCCCATTTTGTCTGGTTCCGGTCCGACCCG                                                                                                                                                                                                                  |

|                 |                                        |                                                                                                                                                                                                                                                                                                                                                                |
|-----------------|----------------------------------------|----------------------------------------------------------------------------------------------------------------------------------------------------------------------------------------------------------------------------------------------------------------------------------------------------------------------------------------------------------------|
| novel_mir2<br>6 | CCGATTGTCACACG<br>TTGAGCCG             | CCCACGATGAGCGCCGATTGTCACACGTTGAGCCGCGTCGAGCATCGAGCGTCGAGCGCTGAAAGA<br>TGCCGAGCGTCGAGTGCCGAGCGGGCTTGCGGATGTGTGGGTGTGCGAGCAAAGGTGGC                                                                                                                                                                                                                              |
| novel_mir2<br>7 | CGCGATCTTGATAC<br>CACCAATGGTGG         | ACCACCGCTAAGGAGGCTTTGATGCGGAGAGCGACGGCGGAGCTACCACCATTGTTGGTATCAATAT<br>CAGCCAGTGTTAAGGAAGCTGTCGCGATCTTGATACCACCAATGGTGGCGGCGCCGCCGCGCCACTGA<br>ATTGCCTTCGAATTTGCATCATAAACGCCATAGCCGATTTGTTTAGATCAATTTTGAGTATGGCCGCTT<br>ACTTTCTACCTCTGTATCTTCTGTTTCTTCTATATTTGGTGGTGGG                                                                                         |
| novel_mir2<br>8 | GAGCTACCACCATT<br>GTTGGTATCAAAGT<br>CA | ACGGCGGAGCTACCACCATTGTTGGTATCAAAGTCAGCCAGCGTTGAGGAAGCTGTAGTGATCTTGA<br>TACCACCAATGGTGGCGGCGCCGCCGC                                                                                                                                                                                                                                                             |
| novel_mir2<br>9 | CGGTAAACCGAAAC<br>CGACCCGATAATCA       | ATTTTTTTTAAAATTTAATTTAATTTTCGGTTAACCGATAACCGAACCGACTAACCGAATCGGTAAATC<br>GGTTAACCGATTAACCGATTGGTATCGGTTCCGGTTATCTATTTTGGGTAAATTCGGTTTCGGTTAACC<br>GAAATTTTCGGTTTCGGTTAACCGAAACCGACCCGATAATCACCCCTATTTAAGACCAACAATTTTCA<br>AAGAGGAA                                                                                                                             |
| novel_mir3<br>0 | TGAATCCGTTGAGA<br>AAGTTAATGAATT        | AATGAATTCATTATGAAAGTTGATGAATCCGTTGAGAAAGTTAATGAATTCAAAAATTCAGAATTTTT<br>CACCCGGGTTTCGAATCCCATGAGGGGCGAAAATTTATTTTTTTGGATTCACTAATTTCCAGCGGA<br>TTCATCAACTTTCCTGTGAATTCATC                                                                                                                                                                                       |
| novel_mir3<br>1 | TTATTGTGAGAACG<br>TGAGAACCAA           | CGTGAGAACCATTTTTATTGTGAGAACGTGAGAACCAAAAAATGATGAATTCACAGTGAAAGTTGA<br>TGAATCCGCTGGGAAAGTTACTGAATCCAAAAAATAAAATTTTCGCCCCTCATGGGATTCGAACCC<br>GGGTGAAAAATTTCTGAATTTTGAATTCATTAATTTCTCAACGGATTCATCACTTTCATAATGAATT<br>CATTTGGTTCTTAGTTTTTAGGATAAGAATGGTTTTTATTTGAACCAAACTCTATATATATATATATAT<br>ATATAGGGGAGGGTTAACGTGAGAACCATTTTTATTGTGAGAACGTGAGAACCAAAAAATGATGAA |

|                 |                                   |                                                                                                                                                                                                                                                                                                                                                                                                                               |
|-----------------|-----------------------------------|-------------------------------------------------------------------------------------------------------------------------------------------------------------------------------------------------------------------------------------------------------------------------------------------------------------------------------------------------------------------------------------------------------------------------------|
|                 |                                   | TTCACAGTGAAAGTTGATGAATCCGCTGGGAAAGTTACTGAATCCAAAAAATAAAATTTTCGCCCC<br>TCATGGGATTCGAACCCGGTGAAAAATTCTGAATTTTGAATTCATTAACTTTCTCAACGGATTCAT<br>CAACTTTCATAACGAATTCATTTGGTTCCTTAGTTTTAGGATAAAAAATGGTTCCTTATT                                                                                                                                                                                                                      |
| novel_mir3<br>2 | TAACTTACTCAACG<br>GATTCATCAACT    | CGTGAGAACCATTTTTATCATGAGAACGTGAGAACCACAAAAAATGATGAATTCATTGTGAAAGTTGAT<br>GAATCCGCTGGGAAAATTACTGAATCCAAAAAATAGAATTTTCGCCCCCTCATGGGATTCGAACCCG<br>GGTGAAAAATTCTGAATTTTGAATTCATTAACTTACTCAACGGATTCATCAACTTTTATAACTAATTC<br>ATTTGGTTCCTTAGTTTTTAGGATAAGAATGGTTCCTTATT                                                                                                                                                             |
| novel_mir3<br>3 | ACCGGAACCGAAC<br>CGAAACCGAT       | TAAACGGTTTTTCGGTTTTTCGGTTAGAACCGGAACCGAACCGAAACCGATAAATTCGGTTAACCGAA<br>AACCGACAAATTCGGTTATCGGTTTCGGTTTCGGTTCCAGAGTTGAAAAAAAATTCGGTTATTGGTTA<br>ACCGATAACCGAACGGTTCGGAACCGAAAAACCGAAAAACCGTTTT                                                                                                                                                                                                                                |
| novel_mir3<br>4 | CTTATAAGCTCTTAA<br>AGCTTATTTTGA   | AGACTTAGAGGGTGTTTGGCTAAGCTTATTTTAGAGAGCTTATAAGCTCCAACAACCTTATAAGTTGTT<br>TTAAGAACTTATAAGATATAATGTATTAAGAGCTTATAAGATGCTGAAGTGTTTGGATAACAAGAGTA<br>AACATGGAAATAAGAAAATATATCAGGATTATTTTGTAGTTTTGTTGTAACCTTATAAGATCATTAAAA<br>AAATAAGTTGGGTTTTGAAGCTTTTTTTTAATAGAGCTTATAAGCTCTTAAAGCTTATTTTGAAAACCTT<br>ATAACCTCTCTAACAACCTAATTTGCCAAACACATTGATTGAGCTTATAAGCTCTTAAACAACCTTATA<br>AGCTGTTTTTAAAGAGCTTATAAGCTCAGCCAAACACCCTCTAAGTCA |
| novel_mir3<br>5 | TTCAGTAACTTTCCC<br>AGCGGATTCATCAA | AAACTAAGAACCAAATGAATTCGTTATGAAAGTTGATGAATCCGTTGAGAAAGTTAATGAATTCAAA<br>AATTTAGAAATTTTACCCGGGTTCTGAATCCCATGAGGGGCGAAAATTCTATTTTTTGGATTCAGTA<br>ACTTTCACGCGGATTCATCAACTTTCCTGTGAATTCATCATTTTTTGGTTCCTCATGTTC                                                                                                                                                                                                                    |

|                 |                                  |                                                                                                                                                                                                                                                                                                           |
|-----------------|----------------------------------|-----------------------------------------------------------------------------------------------------------------------------------------------------------------------------------------------------------------------------------------------------------------------------------------------------------|
| novel_mir3<br>6 | ATCCGCTGGGAAAG<br>TTACTGAATCCA   | CGTGAGAACCATTTTTATTGTGAGAACATGAGAACCACAAAAAATGATGAATTCACAGTGAAAGTTGAT<br>GAATCCGCTGGGAAAGTTACTGAATCCAAAAAATAGAAATTTTCGCCCTCATGGGATTCGAACCCG<br>GGTGAAAATTTCTAAATTTTTGAATTCATTAACTTTCTCAACGGATTCATCAACTTTCATAACGAATTC<br>ATTTGGTTCCTAGTTTTTAGGATAAGAATGGTTCTCATT                                           |
| novel_mir3<br>7 | ATAGGAATGAATCT<br>GGGCCTTTGATTTG | CCACTGAAGGGTAAATTTATTGTCCAGTTATTGGTAGTCCAAATTTATATATATATATATATATATATATA<br>TATATATATATATAGGAGATGGATCAGGTAGGAATGGATAATTTGGTAGGAAATAGGAATGAATCTGG<br>GCCTTTGATTTGCTATATCAATGGTTGAGATTTAATTTTCGGGTGTGCTACAGTTTTGTGTTTTGTGTGC<br>TACACGGATTATTGTGCAACACTATAACTCTTCTTGTGC                                      |
| novel_mir3<br>8 | TTCGTTTTCATACAT<br>TGTAGCTATAACA | AAAGTTTCATTCTTTTGAATTCGTTTTCATACATTGTAGCTATAACAACAAATGCATAACAACAATTT<br>GATGATCCTTGATTTGACACACGATGAGGCTCAACGATCATTAAATTATTGTTATGCATTTGTTGTAA<br>AGCTACTATGTATGAAGACGAAGTTCATTAGAGGGGAAC TTC                                                                                                               |
| novel_mir3<br>9 | TATAAACGACATCG<br>TAGAGAGATGA    | ATTTGACATCTAAAAAATTTACTATAGACAAAACGGTTGTTTTAATTAGTTTTATAAACGACATCGTAG<br>AGAGATGATATCGATTGTTTTGATCCCAACAAGAACCAGATGATAAAACAAACGAAAATATTTGATT<br>TTTGTAATGAGAGTTGACGCAATGAATCATAGAAATAAAAAAATCTGATTTATTTTGATGGAATGACG<br>ATGTTTTATATCATCTCTCTATGATGTCGTTTATATCACTAACTGTTTTGCCTATTGTAAATTTTGAGAT<br>ATCAAGC |

|                 |                                        |                                                                                                                                                                                                                                                                 |
|-----------------|----------------------------------------|-----------------------------------------------------------------------------------------------------------------------------------------------------------------------------------------------------------------------------------------------------------------|
| novel_mir4<br>0 | GGCCGAGTTGGTGG<br>TCTCCA               | ACCCATTATTATGGAAGGAGACCGTCGGCTTGGATGGCCATCTTTGCAGGAGATTGTTGACGCTTTCT<br>TTGCCCCGGGAAACGTTCCGGCAAAAATTCCGAGAAGACATAGGCCGAAGTTCTTCCTCGGTAGATTGG<br>TAGTCCGTCTTTTCCAAGTTGAGGCAGAAATTATCCAAAGCAACCTCAATTTTCTTGAGTTTCATGGC<br>CGAGTTGGTGGTCTCCACCATATGAGTGGGG        |
| novel_mir4<br>1 | GAAGACACGAGAT<br>AGATCAAT              | TAGGTATCCTCTTGATTCTCTGCTTCTTAACGAGTACTGGAGCGAGAGAGATGAGTGTTTCTCGACAA<br>GATTTGGCGATGATCTGTGCAGGCTCACTCGGACAGATGTGTTGAAGAGCAGGGGATTGGATGAAG<br>ACACGAGATAGATCAATGTCGGGATCATGCTGGCGTTCTTCGTCTTCTATCAGATACTTT                                                      |
| novel_mir4<br>2 | TCATGTGACAGAGG<br>ATGTAGTACACCTA<br>A  | ATAGGTGTATTACATCCTCTCTCATATGATAATATTTTATTAATATAAAATTAATAAAATATTATCA<br>TGTGACAGAGGATGTAGTACACCTAA                                                                                                                                                               |
| novel_mir4<br>3 | GTGCGAGCGTCGAT<br>CTGGTGGTCCGAG        | GTCGGATCCCGGATGGATGCGTGCAGGTGCAACGAGGAAGGCCGTGTGCAGCACAGCAGCAGGAC<br>GGACGTGTGCAGTGCAACGAGGGGGCCAGGACGGTGCGAGCGTCGATCTGGTGGTCCGAG                                                                                                                               |
| novel_mir4<br>4 | CACAGCAGCAGGA<br>CGGACGTGTGCAGT<br>GCA | GTCGGATCCCGGATGGATGCGTGCTGGTGCAGCGAGGAAGGCCGTCTGCAGCACAGCAGCAGGAC<br>GGACGTGTGCAGTGCAACGAGGAAGCGAGGACGGCGCTGGATGTGCAGCGAGGGGGCCAGGACC<br>GTGCGAGCGTCGATCTGGTGGTCCGAG                                                                                            |
| novel_mir4<br>5 | TTTAAACTCTAAAC<br>TATATATGTTTTATC<br>A | AGGGTAAATATTAATTTAAACTCTAAACTATATGTTTTATCAAAAATATCATGTACTTTCAAAAATAT<br>AAATTTAAACCCTAAATTATCATATTTGTATCAATTTAAATCCCAAACCTATCCTGAACACAGGGGTATT<br>TTTGATACAAATATGATAGTTTGGGGTTTAAATTGATATTTTTGAAAGTTCAGGATATTTTTGATAAAA<br>CATGTATAGTTTAGGGTTTAAATTGATATTTACCCA |

|                 |                                        |                                                                                                                                                                                                                                                                          |
|-----------------|----------------------------------------|--------------------------------------------------------------------------------------------------------------------------------------------------------------------------------------------------------------------------------------------------------------------------|
| novel_mir4<br>6 | AAGTTGTGCACAAC<br>GAAAACTTTCTAAA<br>AT | GTATAAAGTTGTGCACAACGAAAACTTTCTAAAATTGTTTGTATGCAACAATTTAGAAATGTTTTCG<br>TTGTGCACAACTTTATAG                                                                                                                                                                                |
| novel_mir4<br>7 | AACCATGCATAAGA<br>CGTTGAAGATGATG<br>CA | TTGAGAATTTGAGAACCATGCATAAGACGTTGAAGATGATGCACAAGATGATATAAAGTTGTGCATA<br>ACGAAAACATTCTAAAATTATTTTGTGGGCAACAATTTTAGAATGTTTTCGTTATGCATAACTTTATA<br>TGTTTTATTTCATCAATTTTATACATTTGTGCATAGTTCTCATGTTCTCAC                                                                       |
| novel_mir4<br>8 | CTTGCCGACCATAC<br>TGATATATCACC         | AGATTGGTTGATTTGATGGATTTGTGGGCAATGACGAGTATTGTGATAGGTCTCGTTCGTTCGTAATGG<br>CATATTGCGTGCCTTGCCGACCATACTGATATATCACCACCCATAAACTGAGTCCTTTCCATTTCAAAT<br>TTCCAATTC                                                                                                              |
| novel_mir4<br>9 | GTTCGTGTCGGACA<br>GATCCTTAACG          | ATCATATTCGTGTTTCGTGTCGTGTCCGTGTAGTACATTTTCGTGTCGTGTTTCGTGTTTCGTGTCGGACAGA<br>TCCTTAACGGGTCGTGTTTCGTGTTTGGCCTTATCAGGTCGTGTCGTTATCGTGTGACACGATAACGA<br>CCCGACACGATAAGGCCAAACACGAACACGACCCGTTAAGGATCTGTCCGACACGAACACGAACA<br>CGACACGAAATGTACTACACGGACACGACACGAACACGAATATGAC |
| novel_mir5<br>0 | GTCACAGGTTCGAA<br>CCCCACCAA            | AATGTGGATATGCAGTCCAACATGAGTCTCGTGCAACTTGTTTCGAGTCTTGACGTTTCGATATGCATT<br>AACTAGGGACAGCCCAATGGTTAAGGTGGGTTTCTGTGGCCGAGAGGTCACAGGTTCGAACCCAC<br>CAAACGCCTCTATGGGTTTGAGTCTGTCACACCTGATTTTCCAAGTGTGGTTCACATG                                                                 |

|                 |                                        |                                                                                                                                                                                                                                                                                                                           |
|-----------------|----------------------------------------|---------------------------------------------------------------------------------------------------------------------------------------------------------------------------------------------------------------------------------------------------------------------------------------------------------------------------|
| novel_mir5<br>1 | TCGTGGCTATAATTT<br>GATATTCCT           | TTGTGGAAATACATATATATAGCCATCCAAGTTAAGGAATGTCAAATTATAGCCACGAACATAAAAAAT<br>GTCAAATTATAGCCAAATAGTACCAATAGTACCAATAGGACCAAATGGTCCTATCGGTACTATTTGGT<br>GATAATAGTCCCAATAGGACCAACAACCTTAGCTATAATTTGATATTTTTATGTTTCGTGGCTATAATTTG<br>ATATTCCTTAACTTGAATGGCTATATATATGTATTTCCACAT                                                    |
| novel_mir5<br>2 | AAAGGAAAGTGAG<br>ACATTTTAAATGGG<br>ACA | ATACTCCATCCGTCCCGCCTATAGTGTCCCCTTTCTTTTGGGTACGAGTATTTAGGTGAAAGGTATAAA<br>GTAGTTAAAGTATTAAAAAGTGAGTAAGGTCCAAACTTTTTGAAAGGTTAATTATTTCTAAAATGGA<br>ATGAGATATTTGTAATGAGACAATCCAAAAAGGAAAGTGAGACATTTTAAATGGGACAGAGGGAGT<br>AG                                                                                                  |
| novel_mir5<br>3 | AAGGTGGGCCATGA<br>GTGTTTTTTTGTA<br>T   | TTATACTCCCTCCGTCCACCAAAAACGTGCATCGATTTTGATGGCACGAGTTTAAAGAAAAGTGTAAAT<br>GAGTGTAAGTAAATGTGTATAAAAAGGTGTGTCATTGGGATAATAAATGAATATATTAATGGATTGT<br>GAGTGTAAGTAAAGGTGGGCCATGAGTGTTTTTTTGTAATAAGTGGATAAGTTGAGGGTAAAAATGTA<br>AAGTTGGTGTTTCTAAAAAAGGAAAGTGCACATTTTGGTGGACGGACCGAAAAGGAATTAAATGC<br>ACGTTTTTGGTGGACGGAGGGAGTATAT |

|                 |                                      |                                                                                                                                                                                                                                                                                                                                                                                                                                                                                                                                                                                                                                                                              |
|-----------------|--------------------------------------|------------------------------------------------------------------------------------------------------------------------------------------------------------------------------------------------------------------------------------------------------------------------------------------------------------------------------------------------------------------------------------------------------------------------------------------------------------------------------------------------------------------------------------------------------------------------------------------------------------------------------------------------------------------------------|
| novel_mir5<br>4 | TTGTTGACAAGTCG<br>GTGTGGACACAGA<br>A | ACCTGGAAATATCTGTAAATGAGATGTCACCTTTTGTGAATATTTCCACATCAAGTGGACCCACAGCC<br>AACATATTTGACAATGGTGTGGGAAAAGGAGTTGGAAGAAGAGGTGCGGCCGCCAATGTTGACTCC<br>AGCCGCCGTCACTTTTTGACATTGAGCCACTGTCCAGCCGCCGTTGTTGACAAGTCGGTGTGGACAC<br>AGAAGCCGCAATTTTTTACAATTGCGGATAACGGCTCAACCCCTCCTATAATTTTCCTCACTTTTTCT<br>TCCCTCAAAATGCACTCACCAAACCTCTCTTTGTTTATCTCACACTTTGCTGCACTTGCTCTTGACA<br>CTTCTGATTGGGAAGAAATGAGCTCTATTTATAGGAGGGGTTGAGCCGTTATCCGCAATTGTAAAAA<br>ATTGCGGCTTCTGTGTCCACACCGACTTGTCAACAACGGCGGCTGGACAGTGGCTCAATGTCAAAA<br>AGTGACGGCGGCTGGAGTCAACATTGGCGGCCGCACCTCTTCTTCCAACCTCTTTTCCCACACCATT<br>GTCAAATATGTTGGCTGTGGGTCCACTTGATGTGGAAATATTCAACAAAAGTGACATCTCATTTACAG<br>ATATTTCCAGGG |
| novel_mir5<br>5 | CCCTCTGTCCCATT<br>AAAATGTCCTACT      | CTACTCCCTCTGTCCCATTTAAAATGTCCTACTTTCCTTTTTGGGTGTGCCATTACAAATGTCTCATTC<br>CATTTTAGGAAATAATTAACCCTTCAAAAAGTGTGGACCCTACCCACTTTTAACTTTAACTACTTT<br>ATACCTTCTCCTAAATACCCGTGTCCAAAAGAAAATGGACACTTAAAGCGGGACGGAGGGAGTAC                                                                                                                                                                                                                                                                                                                                                                                                                                                             |
| novel_mir5<br>6 | ATAAGTGGATAAGT<br>TGAGGGT            | CTCCGTCCACCAAAAACGTGCATCGATTTTGGTGGCACGGGTTTTAAGAAAACGTGAATGAGTGTA<br>AGTAAATGTGTATAAAAAGGTGTGTCAATTGGGATAATAAATGAATATATTAATGGATTGTGAGTGTA<br>AAAGGTGGGCCATGAGTGTTTTTTGTAAATAAGTGGATAAGTTGAGGGTAAAAATGTAAAGTTGGT<br>GTTTCTAAAAAAGGAAAGTGCACATTTTGGTGGACGGAC                                                                                                                                                                                                                                                                                                                                                                                                                  |

|                 |                                      |                                                                                                                                                                                                                                                                                                             |
|-----------------|--------------------------------------|-------------------------------------------------------------------------------------------------------------------------------------------------------------------------------------------------------------------------------------------------------------------------------------------------------------|
| novel_mir5<br>7 | AGTGATGAAATTC<br>GATAGTTTGTGAGT<br>T | ACACGATAGTTTTCATGGTGTGCACAACCGTGTAGTGATGAAATTCGATAGTTTGTGAGTTTAGCAA<br>CTTAGAAATTGAATTCAGATTGCTATGTTGTTGATTTTATGTGAAAATTAGTGTGGTCGAAAATACACG<br>GTTAGAACCGTGTACACTGTTTGAATCGTGTA                                                                                                                            |
| novel_mir5<br>8 | GGTCATCTTGGGTA<br>GGACAGTCCAAAA<br>A | CGCGCATAGAAGATCATACAAACGATGAGTTTTTAGTACTCCGTCCAAAATTGTTTCATTTCTTTTTGA<br>CATGATTATTTAGAAGAAGGGATAAAGTGGTTAAAATGATAAAAAAGTAGGTAGGATCCATAACTTT<br>TGAAGAGTTAATTATTTCTAAAAATGAAACAGGTCATCTTGGGTAGGACAGTCCAAAAAGGAATAC<br>GTGTCATCTTGAGTGGGACGGAGGGAGTATTTGATTTCAATGAGTATGTGTTACACCTCAAGTTTGTA<br>TGTCGATTGCGCA |
| novel_mir5<br>9 | ATCTTGGGTGGGAC<br>GGAGGGAGTA         | ATACTCCCTCCGTCCCAACCAAGACGGCTCCTTTCTTTTCGGCACTGTTTATTTAATAGAAGGGTATAA<br>AGTGAATAAATTGATAAAAAGTAGGTAGGTCCCACAACCTTTTAAAGAGATAATTATTTCTAAAAAG<br>GAAACGTGCCATCTTGGGTGGGACAGCTCAAAAAGGAAAGCGAGCCATCTTGGGTGGGACGGAGG<br>GAGTAC                                                                                 |
| novel_mir6<br>0 | AGGTCATCTTGGGT<br>AGGAC              | TAATACTCCCTCCGGCCCAACCAAGACGGCTCCTTTCTTTTCGGCACGGTTATTTAGGAGAATGGTAT<br>AAAGTGAATAAAGTGATAAAAAGTAGGTAGGTCCCACAACCTTTTGAAGAGATAATTATTTCTAAAA<br>ATGAAACAGGTCATCTTGGGTAGGACAGTCCAAAAAGGAATACGTGTCATCTTGAGTGGGACGGAG<br>GGAGTATTT                                                                              |
| novel_mir6<br>1 | TCCGACTCGATAAG<br>CCTGCTGGCG         | ACTGCCAGGTCGGAGATGAAGGAGGAAAACTCTCCGACTCGATAAGCCTGCTGGCGAAGGCCCT<br>CAACATAGGTCCTTGCCCCGCCAGCAAGGCGCTTGTCTGCCCCGCCAGCTTCCTCTCCGCCTCGGCA<br>GC                                                                                                                                                               |

|                 |                                  |                                                                                                                                                                                                                                                                                                                                 |
|-----------------|----------------------------------|---------------------------------------------------------------------------------------------------------------------------------------------------------------------------------------------------------------------------------------------------------------------------------------------------------------------------------|
| novel_mir6<br>2 | GAACGGTTCGGAT<br>CGGTCCGGG       | ACCGGGTCGGACCGGAACCGGACAAAACGGGTCGGGTCTTGACCGGTCCGGGTCCAAGCGGTTCT<br>GGAACCGGAACCGGAACCAGAACCGTTGTTTTAAATTTAATGGGCTTTGAACGGTTCGGATCGGT<br>CCGGG                                                                                                                                                                                 |
| novel_mir6<br>3 | GTTCGGTTTTCGGTT<br>AACC          | ATTTTCGGTTAACCGAAAACCGATCGGTTCCGACGGTTCGGTTTTCGGTTAACCGAAAAA                                                                                                                                                                                                                                                                    |
| novel_mir6<br>4 | TAATTTTAATTCGGT<br>TTTTCGGT      | CATCGGGGTTTCGGGGTTTCGGGGTTTCGGGGTTTCGGGTTTAGGGTTTAGGGTTTAGAATTAAAGTTAATC<br>GACGGTTTGATTCTATTTATATATTTTATTTATTTTTAATAAGTTCAATTTTTTAATTTTATTTTATTTATTT<br>TATTTATTATTTTATTTATTTTATTATTAATTAATTTAATTCGGTTTTTCGGTTAACCGAAAACCGAACC<br>GTCGGAACCGATC                                                                                |
| novel_mir6<br>5 | TTGGCACGTTTCCT<br>AAAAAGGAAA     | AATACTATCTCCGTCCCACCATTCCTTGGCTCGTTTCCTTTTTGGGCTGTCCCAACAAGTTGGCACGTTT<br>CCTAAAAAGGAAACAATTTTACACTAAAAAGTATCTCGAATTCGTGTCACCTACTTTTTACACACA<br>AAACACAACCTCTCCTTAATCTACGTGCAAAAAGAAAGGAGCCATGATTCATGGGACGGAGGGAGTA<br>TA                                                                                                       |
| novel_mir6<br>6 | ATTTTtaggggagc<br>TTATAAGCTGTTGG | TAGAGAGATAAAATTGAAGAGAGGTGAAGTTGATAGTGTATGTGTAGAAAATAACGAACCTATAATAA<br>GATTATTTTGGTAAATTCATGATTGCTTATAAGTTTATGAAAAAATAAGTTAGGGTTGACCAACTTATT<br>TTTAGGGGAGCTTATAAGCTGTTGGAGCTTATTTTACAGCTTATAAGCTGTTTAGGAGCTTATTTTGT<br>CAAACACTTTGCAATAGATTATAAGCTCCTAAACAGCTTATAAGCTCCGCCAAACACCCTCTAGAAC<br>TATCCACACACTTTACTTCTCTGTCTCTCTT |

|                 |                                      |                                                                                                                                                                                                                                  |
|-----------------|--------------------------------------|----------------------------------------------------------------------------------------------------------------------------------------------------------------------------------------------------------------------------------|
| novel_mir6<br>7 | AGGAAACGAGCCA<br>AGAATGGTGGGAC<br>GG | CCTCCGTCCCATCATTCTTGGTTCATTTCTTTTTGCACGTAGATTAAAGGAGAGTTGTGTTTTGTGTGTA<br>AAAAGTAGGTGGCACAAAATTCGAGATACTTTTTAGTGTAATTTTTTTTTTTTTTTTGAACGTGTCA<br>ACTTATTGGGACAGCCCCAAAAAGGAAACGAGCCAAGAATGGTGGGACGGAGA                           |
| novel_mir6<br>8 | CCGTCCCATGAATC<br>ATGGCTCCTT         | GTTATACTCCCTCCGTCCCATGAATCATGGCTCCTTTCTTTTTGCACGTAGATTAAAGGAGAGTTGTATT<br>TTATGTGTAAAGTAGTGTGTGGTGCGAAATTCGAGGTACTTTTTAGTGTAATAATTATTTCATTTTTTGG<br>AACGGGCCAACAATAGCGGAACAACCCAAAAAGGAAAATGAGCCAACAATAATGGGACAGAGGG<br>AGTATAAG |
| novel_mir6<br>9 | GACGTAGCTCAGTT<br>GGTTAAGAGCT        | AAGAGGCTACATGGTTTGCCCCACGGACGTAGCTCAGTTGGTTAAGAGCTAGCAGATTTGTAAACA<br>AGGATCAAGGATCGAATCCTAGCAGCCGCAGTGTGGGAGTTTCACCCTCTTTAGGGTGGCTCCTTGT<br>GGATATTAGGTAAAAGTCCTCCTAGCTTCTTAACCGCTGAGTCACTGTGATTTACCCTCTC                       |
| novel_mir7<br>0 | TCAATAAAGTTGTG<br>GGAAGATATGATGA     | ATGGCCCTCTTCTTATTCTTCCACAGCTTTCTTGAAGTGCATATCACTGTATGCCTGCTGATCATTCTTT<br>GTAGTTCAATAAAGTTGTGGGAAGATATGATGATGGTCAA                                                                                                               |
| novel_mir7<br>1 | TTCAATAAGGTTGT<br>GGGAA              | CTTCCACAGCTTTCTTGAAGTGCATCACTGTATGCCTCCTTACTGCAGCTGATCATACTTTGTAGTTC<br>AATAAGGTTGTGGGAA                                                                                                                                         |
| novel_mir7<br>2 | AGATAGCGGCTGCG<br>GGTTCCTCAT         | CCCAACCCCCCTTTTCTATGTGGTTTGCAAGCTATTGCATAGGAACGTGGGGTTTACCCAGTGCACAC<br>CTAAGATAGCGGCTGCGGGTTCCTCATGATATCCAAAAAAAAGAAGATTCTTTCTACAACGAAGC<br>TAGCAAAAAATTTATGTGGGATTATGGGGATGGA                                                  |
| novel_mir7<br>3 | CGTGGCGAGGATCA<br>ATGGTGAATG         | GTCACATGTCGCCTATTTGACACTTCACGCCTCGCACGACCCGTTGCCGAGATGGGGCAAGTCGTGG<br>CGAGGATCAATGGTGAATGGCGAGTGTGGA                                                                                                                            |

|                 |                                        |                                                                                                                                                                                                                                                                                                                               |
|-----------------|----------------------------------------|-------------------------------------------------------------------------------------------------------------------------------------------------------------------------------------------------------------------------------------------------------------------------------------------------------------------------------|
| novel_mir7<br>4 | ATAAAGTGAATAAA<br>GTGATAAAAAGTAG<br>GT | TTACTCCCTCCTCCGTCCCATTCAAAACGATCCATTTTTTTTGACACGGTTATTTAGGAGAATGGTATA<br>AAGTGAATAAAGTGATAAAAAGTAGGTAAGTCCCACAACCTTTTGAAGAGATAATTATTTCTAAAAA<br>GGAAACGTGCCATCTTGGGTGGGACAGCTCAAAAAGGAAAGCGAGCCATCTTGGGTGGGACGGAG<br>GGAGTAT                                                                                                  |
| novel_mir7<br>5 | AGATTTACATGATT<br>GTTATTTT             | TCAGGGGCTAAGTGACAGCAAGAAAGTGAATCCGGGGAAGGTCGATCTACGCGTGGGAAATGGAG<br>CAAGAGTTGTTGCTGAACGCGTGAGGACTTATAGATTAGATCTTCGAGATATAGACTAGATTTACATG<br>ATTGTTATTTTGTTCCTGC                                                                                                                                                              |
| novel_mir7<br>6 | AGAGTTGCTGCCGA<br>ACGCGTGGGGACTT       | TGTCTATAAATAATTCACATTCTTGGGTATTAGATACCGGCTGTGGCTCACACATTTGTAATAATGTGG<br>AGGGGCTTAGTGACAGCAGGAAGGTGAATCCTGGGGAGGTCGACCTACGCGTGGGAAATGGAGCA<br>AGAGTTGCTGCCGAACGCGTGGGGACTTATAGATTGGATCTTCCTTCGGGTATAGACT                                                                                                                      |
| novel_mir7<br>7 | TGCTTTAAAGGTTT<br>CTCCAATTATGCTA       | AGTGGTTGGATGGTTGGATTTTTAGGTGGTTGTTGATAAACATGGTCTTATGGCAGCTAGATTTCTCTT<br>GGATTGCTTTAAAGGTTCTCCAATTATGCTACCACC                                                                                                                                                                                                                 |
| novel_mir7<br>8 | GATGAATCCGTTGA<br>GAAAGTTAATGAAT       | ATATATATATATATATATAGAGTTTGGTTCAAATAAGAACCATTCTTATCCTAAAACTAAGAACCAAA<br>TGAATTCGTTATGAAAGTTGATGAATCCGTTGAGAAAGTTAATGAATTCAAAAATTCAGAATTTTCA<br>CCAGGGTTCGAATCCCATGAGGGGCGAAAATTCTATTTTTTTGGATTCAGTAATTTCCCAGCGGATT<br>CATCAACTTTCACTGTGAATTCATCATTTTTTGGTTCTCACGTTCTCACAATAAAAATGGTTCTCACGT<br>TAACCCTCCCCTATATATATATATATATAG |

|                 |                                  |                                                                                                                                                                                                                                                                                                                           |
|-----------------|----------------------------------|---------------------------------------------------------------------------------------------------------------------------------------------------------------------------------------------------------------------------------------------------------------------------------------------------------------------------|
| novel_mir7<br>9 | TGAATTCGTTATGA<br>AAGTTGATGA     | CCATTTTATCCTAAAACTAAGAACCAAATGAATTCGTTATGAAAGTTGATGAATCCGTTGAGAAA<br>GTTAATGAATTCAAAAATTCAGAATTTTTCACCCGGGTTCGAATCCCATGAGGGGCGAAAATTCTATT<br>TTTTTGGATTTCAGTAATTTTCCCAGTGGATTCATCAACTTTCCTGTGAATTCATCAATTTTGGTTCTT<br>AGGTTCTCACAATAAAAATGA                                                                               |
| novel_mir8<br>0 | CTCGACCGGTCACG<br>GCGACTATGTGTA  | TTGGTCCACCAACGTAAAAAAGGGTAACGATCGGATCCGACTTAGTTGAGGACTAACTCGGATTGT<br>GTACACGTGTGACTGTGTGTTAAGGTTAGCTACCTCGACCGGTCACGGCGACTATGTGTAGGTGGCC<br>AC                                                                                                                                                                           |
| novel_mir8<br>1 | AAGAATTCATCTTG<br>ATCATCCATTTGCC | ATATATATATATATATATATATATAGGGTTGGGTATAATACAAACCCCTTAAAATAAGAAATAAGAAT<br>TCATCTTGATCATCCATTTGCCATTAATCAATGGTTAAAGATTAAGTTATCACATTCCCTATAATTAAGG<br>GACGGTATTTTCGTAATATTCTGTAATTACCATTATACCCTAATTTGATTTAATCACACCACACATCT<br>TCAAAAATCAATGGTTCAAATTTGTTCTCATTTCTTATTTTGAATGTGTTTTATTGAACCCAATCCT<br>ATATATATATATATATATATATGT |
| novel_mir8<br>2 | AAGGAGCCGTCTTG<br>GGTGGGACGGAGG  | AATACTCCCTCCGTCCCACCCAAGATGGCTCGCTTTCCTTTTTGAGCTGTCCCACCTAAGATGGTCTG<br>TTTCCTTTTAGGAAATAATTATCTCTTCAAAAGTTGTGGGACCTACCTACTTTTTATCACTTTATTCAC<br>TTTATACCATTCTCCTAAATAACCGTGCCGAAAAGAAAGGAGCCGTCTTGGGTGGGACGGAGGGAG<br>TATA                                                                                               |
| novel_mir8<br>3 | AAATGAGCCGTCTT<br>GGGTGGGACGGA   | AAATACTCCATCCGTCCCATCCAAGATGGTTCGCTTTTCTTTTTGAACTGTCCCACCCAAAATGGCTC<br>ATTTCTTTTAGGAAATAATTATCTCTTCAAAAGTTGTGGGACCTACCTACTTTTTATCACTTTAACCA<br>CTTTATACCATTCTCCTAAATAACCGTGCCGAAAAGAAATGAGCCGTCTTGGGTGGGACGGAGGGAG<br>TATTA                                                                                              |

|                 |                                        |                                                                                                                                                                                                                                             |
|-----------------|----------------------------------------|---------------------------------------------------------------------------------------------------------------------------------------------------------------------------------------------------------------------------------------------|
| novel_mir8<br>4 | TTGATCCCTTGGCC<br>GAGAATGTGTTGTT<br>GC | TGTGCTTTCATTGATGCTATTGATCCCTTGGCCGAGAATGTGTTGTTGCAGGAACATAGCCTCGAGGA<br>AGTTTTTGCAGGATCGGCTGACGAGGAAGAGTGGGCACGTGAAGTTGCTAATATGACAAAGCCCAC<br>TCTAGAAATGAAGGAACT                                                                            |
| novel_mir8<br>5 | GTCCATACTTTTTAA<br>ATGGATAATTAT        | CTCCCTCCGTTCCGCTTAAAGTGTTAATTTCTTTTGGGCACGGGTATTTAGGAGAAATATATAAAATA<br>GTTAAAGTGTTAAAAAGTGGGTAGGGTCCATACTTTTTAAATGGATAATTATTTCTTAAATGGAATG<br>AGATATTTGTAATGAGACAATCCAAAAAGGAAAGTGAGACATTTTAAATGGGACAGATGGAA                               |
| novel_mir8<br>6 | TAAGCATAGGAACT<br>CGATTTTTAGA          | AATTGCAGTCCTGTGTGTGTTGGCCTAGTGGTAGAGTGGTTAATGCTCGAGGCCAAAGGTCTCGGGT<br>TCGAATCCACCGTGACGCAATTTTTAAAAATTTCTGTATTAATTGAAAAAAAAAGAAAAAAAAAATGTA<br>TATGGTTAAGCATAGGAACTCGATTTTTAGAAAGCAAACCTTAGCAACCACCTCGTGTCAACCACCA<br>TTCCGACATCCACCGCAGTT |
| novel_mir8<br>7 | GCCATGAATGGCGG<br>GACGGAGG             | TCTCCGTCCCACCATTCTTGGCTCGTTTCCTTTTTTGGGCTGTCCCAACAAGTTGGCACGTTTCCTAAA<br>AAGGAAACAATTTTACACTAAAAAGTATCTCGAATTTCTGTGTCACCTACTTTTTACACACAAAACAC<br>AACTCTCCTTAATCTACGTGCAAAAAGAAAGGAGCCATGAATGGCGGGACGGAGG                                    |
| novel_mir8<br>8 | CGTCTTAACATTGAT<br>CCGGCCAC            | ATGGTCTCCATTGGATATGACTGGGGTCTCGCCCGAGCTCATAACTCATCGTCTTAACATTGATCCGG<br>CCACTAAACCAGTTCGGCAGAAGAAAAGAAGTTTTGCCGCGGAGCGAAGCCAGGTCATAAGAGAT<br>GAGGTAACCCAACTCCAGGAGGCTAAAATCCTGTACGAGGTTAAATACCCAACTTGATGGCTAA                               |

---

|                 |                                        |                                                                                                                                                                                                               |
|-----------------|----------------------------------------|---------------------------------------------------------------------------------------------------------------------------------------------------------------------------------------------------------------|
| novel_mir8<br>9 | AGGAAAGCGAGTC<br>ATCTTGAGTGGGAC<br>GGA | TTACTCCCTCCGTCCCACCTAAGACGGCTTCTTTCTTTTCGGCACGATTATTTAGGAAAATGATATAAA<br>GTGATAAAAAGTAGGTAGCTCCCACAACCTTTGAAGATATAATTATTTCTAAAATGGAAACGTGTCA<br>TCTTGGGTGGGACAACCTCAAAAAGGAAAGCGAGTCATCTTGAGTGGGACGGAGGGAGTAT |
|-----------------|----------------------------------------|---------------------------------------------------------------------------------------------------------------------------------------------------------------------------------------------------------------|

---

|                 |                          |                                                                                                                               |
|-----------------|--------------------------|-------------------------------------------------------------------------------------------------------------------------------|
| novel_mir9<br>0 | GCGCACTCCACTAG<br>TCGAAA | TGCTTTTGAAGAAATGCAGCCACACGTGAGCTGCCGGCTTTAAAAGAGTGGCTCGCAAGGTGCGCA<br>CTCCACTAGTCGAAAAATCCCATTAGCTCCGTCAATGGCTGCAACTTCGAGGGCC |
|-----------------|--------------------------|-------------------------------------------------------------------------------------------------------------------------------|

---

|                 |                                 |                                                                                                                                                                                                                                                                     |
|-----------------|---------------------------------|---------------------------------------------------------------------------------------------------------------------------------------------------------------------------------------------------------------------------------------------------------------------|
| novel_mir9<br>1 | TCTTCCTCGAAGCT<br>GCCACCTCGCTCG | ACATGCGTCCTAAGTCGGGGATGGCCTCATACGACCAAATATGTAAGGCCCAAACAGGATCATAGA<br>AATGGTACGTCTTCCTCGAAGCTGCCACCTCGCTCGGGTGCCTCTTCAGCACATCAATCCCGTGATA<br>GAGGACCTGGAATGAATAGGAGCCCCAAGGAAAACCTCTGCCACATATCAAAATCCTCAGCCAACGC<br>CCAAACCCATGGCTCGATGGCTTCCCTATCGCGGCAAAGGACGATGA |
|-----------------|---------------------------------|---------------------------------------------------------------------------------------------------------------------------------------------------------------------------------------------------------------------------------------------------------------------|

---

---

novel\_mir9  
2

GAAATGTGCGTTCA  
AAACAATCAAGCG  
G

GCAACTCTTTCAAATGACGTCAAACATTCTTGATACACGATGCCACCGTCAAATCTCGGTGGTGAAA  
AATTATTGTTGCGCCGACAAAACTCTTCGATATTATCTAACGACATCGGCCTACAATGTGATTCTTCCC  
ATCCTGATTCTGTTGTTTCTTGATTGATTTCTTCCCAATCAGAACCTGAATTGATTTCTTCCGAATCAG  
AACCTGCTTCATGTCCTGGATTGATTTTTTCCAAATCAGAACCTGAATCAGAACTGGAAATGGGAAA  
CGTCACTTGCTTGTTTTGAATTCACATTTGCCACTCTTCTCTCCCATTTTTTTTTTCCAAATGAAAAG  
ACTGACCCCTAAAATTGAATTTATGATATTTGCTATCGCGCGCAAACACATTTTTTTCTTTTTCTTTTT  
TATTTGTTTATCTTTTATTTTTCTTACTTTTCCCAAATTTGAGTTACAATATATTAATCAAATTTATTT  
GGGAAAAGTAAGAAAAATAAAAGATAAACGAAATAAAAAAAGAAAAAAATGTGTTGCGCGCGGAT  
AGCAAAATATCATAAATTCAATTTTAAGGGTCAGTCTTTTTATTTGGAAAAAAATGGGGGAAAAGA  
GTGGCGAAATGTGCGTTCAAAACAATCAAGCGGCGTTTCCCATTTCCAGTTATGATTCAGGTTCTGAT  
TTGGAAGAAATCAATCCCGGGCATGAAGCAGGTTCTGATTCGGAAGAAATCAATCCATGTTCTGATT  
GGGAAGAAATCAATCAAGAAACAACAGAATCAGGATGGGAAGAACCAAATTGTAGGCCGATGTGCG  
TTAGATAATATCGAAGAGTTTTTGTGCGCGAACAATAATTTTTCACCACCGAGATTTGACGGTGGCAT  
CGTGTATCAAGAATGTTTGACGTCATTTGAAAGAGTTG

---

novel\_mir9  
3

ACGTGCCATGAATA  
TTGGGACGGAGGG  
A

CTATGTACTCCCTCCGTCCCAATATTCATGGCACGTTTTCTTTTCGGGCTGTCCCATTAAGTTGGTCC  
GTTTCTAAAAAAGGAAACACTTTTTTACACTAAAAAGTGTATCGAATTTCTGTGTCATCCACTACTTTAC  
ACACAAAACACAATTCTCCTTAATCTACGTATAAAAAAGAAACGTGCCATGAATATTGGGACGGAG  
GGAGTATATGA

---

|                 |                                  |                                                                                                                                                                                                                                                                                                                                 |
|-----------------|----------------------------------|---------------------------------------------------------------------------------------------------------------------------------------------------------------------------------------------------------------------------------------------------------------------------------------------------------------------------------|
| novel_mir9<br>4 | AACTACCAGGCCCA<br>AGCATC         | CGTTTTCTGCGTCTTTTGGGGGGGGGGTGTGATAGGATACGGCCCAACTACCAGGCCCAAGCATC<br>AGGCCCAATACAAGTAAGCCTGACATCAAGCTCGGCCTGGACAAGTTCGGCCCAAGAAGACTCCTA<br>AAACCAGTGGGAACGCAGAAGGCT                                                                                                                                                             |
| novel_mir9<br>5 | TGTTTTCGTTGTGCA<br>CAACTTTATAGAT | CGAACTATGCATAAGACGTGTAAAGATGATGCACAGAACGGTATAAAGTTGTGCATAACGAAAAC<br>TTCTAAAATTGTTTTGTTGTGCAACAATTTTAGAATGTTTTCGTTGTGCACAACTTTATAGATTTTATTC<br>ATCAACTTTATACGTCTGTGCATAGTTCT                                                                                                                                                    |
| novel_mir9<br>6 | CATTAAAGTGTCC<br>ATTTTCTTTGGG    | AAGTTCTTATATTATACTCCCTCCGTCCCATTTAAAGTGTCCATTTTCTTTGGGCACGGGTATTTAGGA<br>GAAAGGTATAAAGTAGTTAAAGTGTTAAAAAGTGGGTAGGGCCACACTTTTTGAAGGGATAATTAC<br>TTCCTAAAATGGAATGAGACATTTGTAATGGGACAACCCAAAAAGGAAAGTGAGACATTTTAAATG<br>GGACAGAGGGAGTATTACACTTCAACTA                                                                               |
| novel_mir9<br>7 | ATGAATATGCTATG<br>AAAGTTAATGA    | ATATATATATATATATATATATAGAGAAGGTTTAACGTGAGAACCATTTTTATTGTGAGAACATGAGAA<br>ATGAATATGCTATGAAAGTTAATGAATACGCTGCGAAAGTTAATGAATAAAAAAATAGAATTTTC<br>GCCTCTCATGGGATTCGAACCCTGGTGAAAATCCGAATTTTGGATTCATTAACTTTCGCAGAGTAT<br>TCATTAACTTTCATAGCATATTCATTTTGTTTTCGTAGTTCTTAGTTCTCACGTTAAAATTGGTTCTTATT<br>TGAACCTCACTCTATATATATATATATATATA |
| novel_mir9<br>8 | AACATGACACGGAT<br>CCGACACGAAATT  | ACGATCCGACACGAACACAAATGCAACACGAAAATTATCGGGTTACACGAACATGACACGGATCCG<br>ACACGAAATTATCGTGTGACACGATAAGGACAAGAACACGATAAGGTTGAACACTAACCTGCTAA<br>TTTCGTGCGTGTTTGTGTGCGTGTCTCGTGTCGTGTCGA                                                                                                                                              |

|                  |                                       |                                                                                                                                                                                                                                                                                                                                                                             |
|------------------|---------------------------------------|-----------------------------------------------------------------------------------------------------------------------------------------------------------------------------------------------------------------------------------------------------------------------------------------------------------------------------------------------------------------------------|
| novel_mir9<br>9  | AATGTGTATAAAAA<br>GATGTGTCAT          | ATGTACTCCCTCCGTCCACCAAAATCGTTCATCGATTTTGGTGGCATGGGTTTTAAGAAAACGTGTAAT<br>GAGTGTAAGTAAATGTGTATAAAAAAGATGTGTCATTGGGATAATAAATGAATATATTAATGGATTGT<br>GAGTGTAAGTAAAGTGGGTCATGAGTGTTTTTTTTGTAAATAAGTGGATAAGTTGAGGGTAAAAATGT<br>AAGTTAGTGTCTAAAAAAGGAAAGTGCACATTTTGTATGGACGGATCGAAAAGGAATTAAATGC<br>ACGTTTTTGGTGGATGGAGGGAGTATAA                                                   |
| novel_mir1<br>00 | GTTGGCTGAGGATT<br>TTGATATGTGGC        | TCGGGATCGGAGGACTACTATTTTCAGAGCTCCGCAGCCGATTTATCAAACAACGGCTGGGTGATGAT<br>GCCGCAGACTACTTGAAGGCGGCTTTCATATTAGTAGCTTACCTCATCGTCCTTTGCCGCGATAGGGA<br>AGCCATCGAGCCATGGGTTTGGGCGTTGGCTGAGGATTTTGATATGTGGCAGAGTTTTCCTTGGGGCT<br>CCTATTCATTCCAGGTCCTCTATCACGGGATTGATGTGCTGAAGAGGCACCCGAGCGAGGTGGCAGC<br>TTCGAGGAAGACGTACCATTTCTATGATCCTGT                                            |
| novel_mir1<br>01 | CGCTTAAGACCCAT<br>AGTTGATGGTCCG       | AGTTCTGGTTCTTGTCCGGTTCTGGTCCGGTTCTGGTTCCAGACCCGCTCAGATCCGGACCGCTTAAG<br>ACCCATAGTTGATGGTCCGGGTCCGATCCGGATCCAGTGTCTAATGGGTCGATTCCAGAACCAGAAC<br>C                                                                                                                                                                                                                            |
| novel_mir1<br>02 | TGAGAACTTGAGA<br>ACCATGCATAAGAC<br>GT | TGGTTCTTATATTCACACTTTAAACTTCAACACCTCTCTCTCTTTGATCCACTCTCTATATAGAGGTTG<br>GATCCAGTGAGAACTTATCTTTTTTGAGAACTTGAGAACCATGCATAAGACGTTGAAGATAATGCAC<br>AAAACAGTATAAAGTTGTGCATAACGAAAACCTTCTAAAATTGTTGCACAACAAAATAATTTAGAA<br>AGTTTTCGTTATGCACAACTTTATACCGTTTTGTGCATCATCTTCAACGTCTTATGCATGGTTTCGAGA<br>GTTTCGCAAAAAAGATGTGGTTCTCATTTGATCCACTCCCTATATATATATATAATTAATAAAAAA<br>GAACCC |

|                  |                                        |                                                                                                                                                                                                                                                                                              |
|------------------|----------------------------------------|----------------------------------------------------------------------------------------------------------------------------------------------------------------------------------------------------------------------------------------------------------------------------------------------|
| novel_mir1<br>03 | GAGCTTATTTTGCC<br>AAACA                | TAACAGCTTATAAGCTGTTTAGGAGCTTATTTTGCCAAACACTTTGCAACAGCTTATAAGCTCCTAAA<br>CAACTTATAAGCTGTTT                                                                                                                                                                                                    |
| novel_mir1<br>04 | AATTTGGACCCTAA<br>AGCTGCCGGTGCAA       | GTGCACCGCGCATTTTGGGCCATCAAAAAGCTGAATTTGGACCCTAAAGCTGCCGGTGCAA                                                                                                                                                                                                                                |
| novel_mir1<br>05 | TGGTGTTTTGAAGG<br>CTGTTTCGGTA          | TGGCATGCTTTCCCGAAAACCAACCGATATGGAGACATTCCCAATGGTGTTTTGAAGGCTGTTCCGT<br>AGGCCACAAGGCGTCATCCAAGCGTAGAGACCAGTCCTTTTCGGTTGGGATTCACCACTTTCTCGAG<br>TATTCCCTTGATTTCTCTATTGGAAAGCTCTGCTT                                                                                                            |
| novel_mir1<br>06 | AAGTTGATGAATCC<br>GCTGGGAAAATTAC<br>T  | GTGAGAACCAAAAAATGATGAATTCACAGTGAAAGTTGATGAATCCGCTGGGAAAATTACTGAATC<br>CAAAAAATAAAATTTTCGTCCCTCATGGGATTCGAACCCGGTGAAAATTTCTAAATTTTGAATTC<br>ATTAACCTTCTCAACGGATTCATCAACTTTCATAACGAATTCATTTGGTTCTTAG                                                                                           |
| novel_mir1<br>07 | ATCGTGAGAACGTG<br>AGAACCAAAAAAT<br>GAT | AGGTAAACGTGAGAACCATTTTATCGTGAGAACGTGAGAACCAAAAAATGATGAATTCATTGTGAA<br>AGTTGATGAATCCGTTGGAAAAGTTACTGAATCCAAAAAAAAGAATTTTGTCCCTCATGGGATTCCG<br>AACCAGGGTGAAAATTTCTGAATTTTGAATTCAGTCATCAACTTTCATAGCAATTCATTTGGTTTTTA<br>GTTTTTAGGATAAAAAATGGTTTTTCATTTGAACCC                                    |
| novel_mir1<br>08 | GTTTTAATAAAAGT<br>TGTTGAGTTA           | TTATACTACCTCCGTCCCCCATATTCCTTCCTAGGAATATGGAGTGCGGGTTTTAATAAAAAGTTGTTGA<br>GTTATTGTGAGTGGAATAGGGGTCCACATTAATATAATATTAATTAGTTAGTGGTGGACCATAGGT<br>GGTAAAAGGTGTAAATAAAGAATATTATTGAGGGTAAAGTTGGAAAGATAGTTTCCATAAATAGATA<br>GGAAGGAAATTGGGGGACGTCCCAAAAAGAAAACTAGGAAGGAATTTGGGGACGGAGGGAGT<br>ATA |

|                  |                                       |                                                                                                                                                                                                                                                                                                                                            |
|------------------|---------------------------------------|--------------------------------------------------------------------------------------------------------------------------------------------------------------------------------------------------------------------------------------------------------------------------------------------------------------------------------------------|
| novel_mir1<br>09 | AGCTTATAAGCTCTT<br>ATAACTTAT          | AAGCTTATAAGCTCCAACAACCTTATAAGTTGTTTTAAGAACTTATAAGATATGGTGTATTAAGAGCTTA<br>TAAGATGCTAAAGTGTTTGGATAATAAGGGTAAACATGGAAATAAGAAAATATATCAGGGTTATTTTT<br>GTAGTTCTGTTGTAACCTTATAAGATCATTAAAAAATAAATTGGGTTTTGGAGCTTTTTTTAATAGAGCT<br>TATAAGCTCTTATAACTTATTTTGAAAACCTTATAAGCTCTCTAATAACTTAATTTGTCAAACACATTGAT<br>TGAACCTTATAAGCTCTTAAACAGCTTATAAGCTG |
| novel_mir1<br>10 | TGAGGCTCGAAAGT<br>GGCTCAGCC           | TCCGGCTCGTGAGGCTCGAAAGTGGCTCAGCCTCGACCCATTTTATGAAGTAATCCACAGCGACGAC<br>TAAGTATCGAAGCTGACCTGGTGCTCGATCGAACGGGCCAACGATGTGATCCCCACTGCATGAA<br>AGGCCATGGACTCTGCAGGCTGCTTAGATCGGTCTGAGGCAGCTTTTTGACCGTGGAGTGAAGCTGG<br>CACTTCGGGCACTTTTTGACGAGCTCGGC                                                                                            |
| novel_mir1<br>11 | AGTGAAGTAAGTAA<br>TCGAGAAAGCAAG<br>GA | GGGATTGTTATGACTCGGAAAGATAGTGAAGTAAGTAATCGAGAAAGCAAGGACGCTATGAGTAC<br>TCGCTAATGCTTGCTCTTTACTAATATAAAATAGGGCCTTTGATTGCTTACTTCGCTATCCCGGGATGATA<br>CTTTACTTATTCATGAACAAAGTCATAATTCTCA                                                                                                                                                         |
| novel_mir1<br>12 | AATATCAGGCCTAG<br>TACACGTA            | ATGAGCTTAACTTCTTGAGTAGAGGGATAAAATATACCTGCATTCAGAGTGCCTTTAATATAGCACAG<br>AATCCTCTTAGCAGCATTCAAATGGGATTGTGCCGGTATTTCCATGTATCTGCTGATTAGTTCAACTCC<br>ATAAAAAATATCAGGCCTAGTACACGTAAGATACCTTAGACTTCCAACTAGGCTTTTGAAATAAGTTG<br>GATCCACCTGCGCTTCGCCGTCACTCATAAGTTCAC                                                                              |

|                  |                                        |                                                                                                                                                                                                                                                                          |
|------------------|----------------------------------------|--------------------------------------------------------------------------------------------------------------------------------------------------------------------------------------------------------------------------------------------------------------------------|
| novel_mir1<br>13 | TGTCTTAATAATGG<br>GCCGATTTT            | GGTTGGGCTGAATTTATTTTAATGTCTGGGCTGGACTTCATTTTAATTAATTGCTGATGGGTTATGTCTT<br>AATAATGGGCCGATTTTTATAATAAAGGAATGGGCCGAGAATTTAAAAGAAGTGGGCCGAAAATAA<br>ATGGGTTGGGCTCCAGTGAATTTAAATAATAGTTGGGCTTAGATTTAATTAATGGTTGGATTTTAGTTT<br>AATT                                            |
| novel_mir1<br>14 | CGTGCCTCATCAAC<br>TGATTGCC             | CCATCAGCTGATTCCCGTGCCTCATCAACTGATTGCCGTGCCACGGGATGAGTATGATGATCGGATGG<br>AGAATGGGTCGGTGT                                                                                                                                                                                  |
| novel_mir1<br>15 | AATGGCAGCAGAG<br>TCGTGAACAAGAA<br>AAGC | AAATGGCAGCAGAGTCGTGAACAAGAAAAGCTTCGTTCTTTGTTGTTGTAGCTGGGTAGCCTCCGAT<br>ATGGCTAGGCTATTAAGTCAGAGATGGGCCTTGAGACGGGATCAACTACAATTGGCCTATCGTTCT<br>GTAGACTATTCTGGTGAGTTGCCTACCCGAGCCCGAACTCGCTTAAGGGAAAAAGAGCAAGCAAC<br>TGAAGACATCACATCGCTTTCTTCCTCCAAGACTATGCTACCATTA         |
| novel_mir1<br>16 | ACTCGATGTAGATG<br>TTCGCATAG            | TCGTTGGATCACAGATACGATCCATGATGTGGTCCGAGAGAATATTCAAGGACTGAAGACGTGGTTT<br>GAGTCTATGCTAGATGAGACTCGATGTAGATGTTTCGCATAGTACTGAGGCATATACGTCATCCCGTCG<br>TGGAAC TACCCACCGCCGATGCGGAGTGACGATCAGGGACGGCAACATTCTATTCTGTA CTTCTACG<br>TCGGGTT CAGATGTACCCCAACAGACTCATCTATCAGATCCGACGT |
| novel_mir1<br>17 | TAAATTCCTATGAC<br>CGAGTCGTTCTG         | AGGTGGTCTAAATTCCTATGACCGAGTCGTTCTGGCCCCTGTGAACATCTTTTTTTAATGTATTAAAGA<br>GGGCCTCTCTAACCGTGAAAAGTGGTGGGTGCCCACTAACGGCCATTCTGGCTCGGCTCCGATAAC<br>GCAATTCGGGAGGAGTCGGTAGTTGGGCACTGGATCCCTTCGGACCTGGAGAACGTGTGACGCTG<br>GGTCGGAGTTTGGTGAACCA                                 |

|                  |                                      |                                                                                                                                                                                                                                                                                                                  |
|------------------|--------------------------------------|------------------------------------------------------------------------------------------------------------------------------------------------------------------------------------------------------------------------------------------------------------------------------------------------------------------|
| novel_mir1<br>18 | TAATTCTCCTGGCGT<br>AGATCTACTTGTTGT   | ATTTCTCCTGACACATTACTAATTCTCCTGGCGTAGATCTACTTGTTGTTAATAGATCGGTAAGAGTAT<br>TGTTCCGATAGATAACTCTTCTATAGAGTTCATTAATATCTGAGCTCATTAATTTACCCCCATCTATCTG<br>AATGATGGGTCTTAACTCAGGAGGAAGAACCGGTAATAGACACAAAACCATCCATTCTGGTTCTATA<br>TTTGTTCTGAAGAAAA                                                                       |
| novel_mir1<br>19 | AAACAAACCAAAC<br>CGTTCGTGAGCTAC<br>T | TTGGTAGGGCTGTAAACAAACCAAACCGTTCGTGAGCTACTCGGAGCTCGGCTCGAAAAAAGCTCG<br>TTCGAAATTCGATCGTTTTGTAAACGAGCCGAACTCGAGCCTCGAATCGAGCTCGATAAGTTTATCG<br>AGCCGAACTCGAGCTTAGAGATGTTTCGGCTCGTAGGCTCGCGAACATGTTTGGTTCGAACTCAAACG<br>AGCCAG                                                                                      |
| novel_mir1<br>20 | GGAAAAAATCGAA<br>GCCGCTT             | CAGATTGCGGTGGAGGAAAAAATCGAAGCCGCTTTATTGGACGATGGCTTTTCTCCAGATGCGATTT<br>T                                                                                                                                                                                                                                         |
| novel_mir1<br>21 | CAGGTCTGATTTTC<br>GTCGGTCTGAAC       | TTCCCAGAGATTGAACCGTTAGATCGCCTTGAGTTTTGGACAGCAGCTTCACAACATCTGGGCCAAC<br>GTTTTAGACGGTGGAGATCGGATTTTGAGTTTTACAGGTCTGATTTTCGTCCGTCTGAACAGTGAAGA<br>ATTTTTGGTGAT                                                                                                                                                      |
| novel_mir1<br>22 | AAGTTTTCGTTATGC<br>ACAATTTTATACT     | TATATATATATATATATATAGGGGTTGGATCCAGTGAGAACTCATCTTTTTTGAGAACTTGAGAACCAT<br>GCATAAGACGTTGAAGATGATGCACAAAACGGTATAAAGTTGTGCATAACGAAAACCTTTCTAAAATT<br>ATTTTGTTGTGCAACAATTTAGAAAAGTTTTCGTTATGCACAATTTTATACTATTTTGTGCATTATCTTC<br>AACGTCATATGCATGGTTCTCAAGTTCTCAAAAAAGATGAGTTCTCACTTGATCCAACCCCTATATAT<br>ATATATATATATT |

|                  |                                |                                                                                                                                                                                                                                                                                 |
|------------------|--------------------------------|---------------------------------------------------------------------------------------------------------------------------------------------------------------------------------------------------------------------------------------------------------------------------------|
| novel_mir1<br>23 | TCGATCCGGATAAA<br>ATCCATCCATTG | TCACTAGGTATTGGTTCTGGTTCCAAAACCGGAACCGGACCGGTTGGACCATCAAAATATGGATCTA<br>AAGCGAGTCTGGAATCGGAACCGGAACTAGAACCGCTGCTTTAAAATTTAATGGGTTTTGAACGATT<br>CCGGATCGATCCGGATAAAATCCATCCATTGACATCTCTAATTAAGGCTATCAGAAAGAAAAAGGAA<br>AAAAAAAAAAGATAATATAAGGAAAAAGCAATGATAGTTGCAAGAAGATGTCTAGTGC |
| novel_mir1<br>24 | TTCGCGGGTACGGA<br>AATGGTTTGA   | CCGCGGGTATCCGTCCGATTATTCGCGGGTTTGGTGTGCATTTCTGATCCGCGGGTACGTTCTGTTG<br>AAAAGTAGGACCCGTTTACTTCGCGGGTACGGAATGGTTTGACAATACCCGTACCCGTGAAACCC<br>GTATACCTGCGAATTTTACCCGCAAAAACACCTGCGAATTACCCGCGA                                                                                    |
| novel_mir1<br>25 | CCTCTTTCCTTCTTT<br>CTTATGCCA   | GGACTCCACCCCTTCTTCACTCCTCTTTCCTTCTTCTTATGCCAAATTTTTTCTTAAACATTTTTGGC<br>GTGAGAAAGAAGGAAAGAGGAGTGGAGAAAGGGGTGGAGTTG                                                                                                                                                              |
| novel_mir1<br>26 | TGGATAAACTAGC<br>TCATTGACA     | ATAAATAAGTATGAGTTCTGGTTCTGGAATCGACCCATTAGATATTGGATCCGGACCTGACCCGGACC<br>ATCGACTATGGGTCTTAAACGGTTCGGATCTGAACGAGTCTGGAACCAGAACCAAACTAGAATCG<br>AAATCGCTGCTTTATAATTTAATGGGCTATGAGTGATTTTCTGATCGATATGGATAAACTAGCTCATTG<br>ACAAGCTTATTAA                                             |
| novel_mir1<br>27 | CGCGAACTAGAAC<br>CAATAAAT      | AGGTTGGTTTTGAGTGACTAATGTGGTGACATGCCTTCCACTTAATAGGTGGGATTAGGGATGTCAAT<br>AGGTGGATTTTACGCGAACTAGAACCAATAAATAAGTAATGGTTCTAGTTCTGGAACCGACCCATTA<br>GATACTAGATCCGGACCAGACCC                                                                                                          |
| novel_mir1<br>28 | ATCCGGCAGTAGAT<br>CCTTTAGATT   | ATTTGCACATTTAGATGCTACTACCGTACTATCAAGAGGATTGGCTGCCAAAGGGATCTATCCGGCAG<br>TAGATCCTTTAGATTCAACCTCAACCATGCTTCAACCTCGGATCGTTGGTGAGGAACATTATGAAACT<br>GCGCAAAG                                                                                                                        |

|                  |                                      |                                                                                                                                                                                                                                                                                                                                                                                                                                                                                                                                                      |
|------------------|--------------------------------------|------------------------------------------------------------------------------------------------------------------------------------------------------------------------------------------------------------------------------------------------------------------------------------------------------------------------------------------------------------------------------------------------------------------------------------------------------------------------------------------------------------------------------------------------------|
| novel_mir1<br>29 | ATTTTTTGGATTCAT<br>TAACTTTCGC        | ATGATGGATTGGCTGTGAAAGTTGATGAATCCGCTGAGAAAATTATCGAATCCAAAAACAATTTTA<br>TTTCCTTTTAAATTTTCACTCCTTATGAGATTAGAACTTAGTGAATTTTTTGAATTTTTTGGATTCATTAA<br>CTTTCGCAATTGACACATTAA                                                                                                                                                                                                                                                                                                                                                                               |
| novel_mir1<br>30 | TCTCCGCATCTTGG<br>GTGGTGGC           | TCTCGATAAGGTTTTAGATGAGTATGAGTTATGACCATCACTTTGACTTGTTATGAGTGAGGGTTATAT<br>GTTCTAACCCAATATTCTCCGCATCTTGGGTGGTGGCAGTGCTTGTATGTCATGCTAGTTACCTGTGTC<br>GAGT                                                                                                                                                                                                                                                                                                                                                                                               |
| novel_mir1<br>31 | CGAGGTAATTTTTA<br>GTGTAAAAAG         | GCCTCGACACGTCGGTGATGGGAGCTGACTACAGAACCTTTGTTGAGATTGTGTTTGAGAACAGAG<br>AAAACATCATTTCAGAGCTGGCATCTTGATGGATACTCGTTCCTTTGTAGTAGGGTGAGCCCTCATAAAA<br>GTCGCTAAAGTAATACTCCCTCCGTCCCAATATTCATGACATGTTTCTTTTTTGCATGTAGATTGTAGAT<br>TAAAGAGAGTTGTGTTTTGTGTGTAAAGTAGTGGATGACACGAAATTCGAGGTAATTTTTAGTGTA<br>AAGTGTTTCTTTTTTAGAAACGGACCAACTTAATGGGACAGCCCGAAAAGGAAAACGTGCCATGA<br>ATATTGGGACGGAGGGAGTATTACTTTAGCGACTTTTATGAGGGCTCACCTACTACAAAGAACGAG<br>TATCCATCAAGATGCCAGCTCTGAATGATGTTTTCTCTGTTCTCAAACACAATCTCAACAAAGGTTCT<br>GTAGTCAGCTCCCATCACCGACGTGTCGAGGCG |
| novel_mir1<br>32 | ATATAAACGACATC<br>GTAGAGAGAAGAT<br>A | GATATAAACGACATCGTAGAGAGAAGATATCAATTGTTTTGATCCCAACTAGAACCCAGACGATGAAA<br>CAAATGAGAAAACTTGATTTTTATAATGAGAGTTAACGCGATGAATCCTAAAAATCAAAAAAACTTA<br>TTTATTTTGATGGAACGACGATATTTTATGTCCTCTCTGTACGATGTCATTTATATCA                                                                                                                                                                                                                                                                                                                                            |
| novel_mir1<br>33 | GTTGGTCGAGGAGT<br>CTTCTTGG           | AGATATGCATCCGAATCTTCTACGTCTCCAATTGCGATTAGAGTTGTAGTTGGTCGAGGAGTCTTCTT<br>GGGCCGAACCTACATGGGCCGAGCTTAATGTCGGGGCCCATTTATATTGGGCCTGATGCTTGGGCCT<br>AGTAGTTGGGCCGTATCCTATCATATCC                                                                                                                                                                                                                                                                                                                                                                          |

|                  |                                        |                                                                                                                                                                                                                                                                                        |
|------------------|----------------------------------------|----------------------------------------------------------------------------------------------------------------------------------------------------------------------------------------------------------------------------------------------------------------------------------------|
| novel_mir1<br>34 | AGTTTCTTGATAGA<br>GCTTAA               | AGACAGAGATTGACAGTTTCTTGATAGAGCTTAAACATGAAAGAAAGATGTGGAAATTCATATATAT<br>AGCCATCCAAGTTAAGGAATGTCAAATTATAGCCACCAACATAAAAAATGTCAAATTATAGCTAAGTT<br>GTTGGTCCTATTGGGACTATTATCACCAAATAGTACCAATAGGTCGTCC                                                                                       |
| novel_mir1<br>35 | TCGACGGATTCATC<br>AACTTTCACAATGA<br>AT | AAGAACCATTTTTAACGTAAGAATAAGAACCATAAAATTTTCGCTATGAACAAAATGAATTCGCTAT<br>GAAAGTTGATGCATCCGTTGGAAAAGTTAATAAATCCAAAAATTAAATATTTTTACCCGGGTCAA<br>ATACCATGAGGGAAGAAAATTCCAAAAAATTTGGATATTTTATGGATTCGGTAAATTTTTTCGACGGA<br>TTCATCAACTTTCACAATGAATTTATAATTTTTTGGTTCTCCCGTTCTTACGAAAAAATGGTTCTC |
| novel_mir1<br>36 | TTGTGTTTTATGTGT<br>AAAGCAGTAGGTG       | TTCATGACCCCTTTCTTTTTTGCACGTAAATTAATGAGAGTTGTGTTTTATGTGTAAAGCAGTAGGTGA<br>TACGAAATTCGAGACACTTTTTAGTGTAAGAAAGTGTTTCCTTTTTTGGAAACGGACCAACTTAATGGG<br>AGAGCCCCAAAAGGAAAACGTGTCAACAATAATGGGACGGATGGAG                                                                                       |
| novel_mir1<br>37 | ACTCCTGGCGTGTT<br>CGCAGCAC             | CGAGCTACGAGGCCCTCTCCGAATCGTCGTCCACAATGGCACGACGGACAGTCTCAGTCACAGCA<br>GCAATGGAGGCCTCGTCTAGTCGAACACTCCTGGCGTGTTTCGACGACACGTGGTCTGGCTCTGGCT<br>CCTCCTCATGTCTACGACGCTTCGACTGCGATCGAGATGCGCCAGGTCGACTCGGCTCA                                                                                |
| novel_mir1<br>38 | AAGCCTGTGGGTG<br>GTCCAA                | TTGGCCCCAAAAAGCCTGTGGGTGGTCCAATTGAACAATCACTTTTTTTGGGCCAT                                                                                                                                                                                                                               |
| novel_mir1<br>39 | AACAATAATGGGAC<br>AGAGGGAG             | GTCCTTCCGTCCCGATATTGTTGGCATTAGATTAAGGAGAATTGTCTTTTGTGTGTAAAGTAGTGTGTG<br>ACACGAAATTCGAGGCACTTTTTAGTGTAAGAAATTATTTCAATTTTTTGAACGGGCCAACAATAGCGGA<br>ACAACCCAAAAAGGAAAATGAGCCAACAATAATGGGACAGAGGGAG                                                                                      |

|                  |                                |                                                                                                                                                                                                                                                                                                                                                            |
|------------------|--------------------------------|------------------------------------------------------------------------------------------------------------------------------------------------------------------------------------------------------------------------------------------------------------------------------------------------------------------------------------------------------------|
| novel_mir1<br>40 | CTCGACCGGTCACG<br>GCGACTATGTGT | TGAGTTGGTCCACCAACGTTAAAAAAGGGTAACGATCGGATCCGACTTAGTTGAGGACTAACTCGG<br>ATTGTGTACACGTGTGACTGTGTGTTAAGGTTAGCTACCTCGACCGGTCACGGCGACTATGTGTAGGT<br>GGCCACCTCC                                                                                                                                                                                                   |
| novel_mir1<br>41 | GACTGTGTGTTAAG<br>GTTAG        | ACGTGGTATGAGAATGTGTTGGTCCACCAACGTTAAAAAAGGGTAACGATCGGATCCGACTTAGTT<br>AAAGGCTAACTCGGATTGTGCACACGTGTGACTGTGTGTTAAGGTTAGCTACCTCGACCGGTCACGG<br>CGACTATGTGTAGGTGGCCACCTCCATAGTGCGC                                                                                                                                                                            |
| novel_mir1<br>42 | AACGTGCTATGAAT<br>ATTGGGACGGA  | CATATACTCCATCTGTCCCATTAAGTTGGCCCGTTTCCAAAAAAGTAAACACTTTTTACACTAAAAAG<br>TGTTTCGAATTCGTGTCACCCACTATTTTACACACAAAAACACAATTCTCCTTAATCTACGTATAAAA<br>AAGAAACGTGCTATGAATATTGGGACGGAGGGAGTATATA                                                                                                                                                                   |
| novel_mir1<br>43 | CCTGTAAGCTCAAT<br>TACCCAAAT    | GAGGGTGTTTGGCTGAGCTTATAAGCTCTTTAAAACGGCTTATAAGCTGTTTAGGAGCTTATAATCTAT<br>TGCAAAGTGTTTGTCAAAAATAAGCTCTTAAACAGATTATAAGCTGTGAAAATAAACTCCAACAGCTT<br>ATAAGATCTCCTAAAAATAAGTTGGTTAACCTAACTTATTTTTTCATAAACTTATAAGCAATCATGAA<br>TTTAGCAAAAATAACCTTATTATGATTCGTTATTTTCAAATCCTATTAACCTTCGCATCTCTTTAATTTCTC<br>TTTCTAATTTACGATTATTTCCGGCCTGTAAGCTCAATTACCCAAATACTTTG |
| novel_mir1<br>44 | ATAAAGTAGTTAAA<br>GTGTTAAAAAGT | CGTCCCATTAAAGTGTCTCATTTCTTTTGGGCACGGGTATTTAGGAGAAAATGTATAAAGTAGTTAAA<br>GTGTTAAAAAGTGGGTAGGGCCCACACTTTTGAAGGGATAATTACTTCCTAAAATGGAATGAGACA<br>TTTGTAAATGGGACA                                                                                                                                                                                              |

|                  |                                        |                                                                                                                                                                                                                                                      |
|------------------|----------------------------------------|------------------------------------------------------------------------------------------------------------------------------------------------------------------------------------------------------------------------------------------------------|
| novel_mir1<br>45 | GAGTTGTAGTTGGT<br>CGAGGAGTCTTCTT<br>GG | AGATATGCATCCGAATCTTCTACGTCTCCAATTGCGATTAGAGTTGTAGTTGGTCGAGGAGTCTTCTT<br>GGGCCGAACTCACATAGGCCGAGCTTAATGTCGGGGGCCCATTTATATTGGGCCTGATGCTTGGGCCTA<br>GTAGTTGGGCCGTATCCTATCAGAAACCTTATAGCATCTGAATTGCACGCCCATCTTAATCCCTATAAT<br>GACATATCA                  |
| novel_mir1<br>46 | CAATGTATGTTGAA<br>TTAAACATCCAAGA       | ATGCTAGGTATATAATCAATGTATGTTGAATTAACATCCAAGATAGATCCTCGGGAGAGGGTTAAAA<br>TCAGATTTTCCTACAATTGGTATCAGAGCCTGGGATCAGTATCTTGGCTCTGTTGGATTAAATCACGTT<br>TGATTATTACGTGCGCAA                                                                                   |
| novel_mir1<br>47 | CCATCTTGGATGGG<br>ACGGAGG              | AATATTCACTCCGTCCCATTCAAGATGACTCGCTTTCCTTTTTGAGCTATCCACCTAAGATGACACGT<br>TTCCTTTTTAGGAAATAATTATCTCTTTAAAAGTTGTGGGACCTACCTACTTTTTATCAATTTATTCAC<br>TTATATCATTCTCCTAAATAACCGTACCGAAAAGAAAGGAACCATCTTGGATGGGACGGAGGGAGTA<br>TT                           |
| novel_mir1<br>48 | GGTTCGGGGAAAAG<br>GATCCCCT             | ATATTTGTTTCGGTAAATATGCTCTTCAGGCACTTGAACCCGCTTGGATCACGTCGAGACAAATCGAA<br>GCGGGTCGCCGGGCAATGACACGAAATGCACGCCGTGGTGGA AAAAATATGGGTCCGCCTCTTTCCA<br>GACAAACCAGTTACAGTAAGACCTGCTGAAACGCGTATGGGTTCGGGGAAAGGATCCCCTGAATAT<br>TGGGTAGCTGTTGTAAACCGGGACGAATAC |
| novel_mir1<br>49 | ATCGTGCTCAAGCT<br>TGGTTTGTTTAGTAT<br>C | TAGCTAGGGGTGTAATCGAACCGAGCCGAGCCGAACACCATCGTGCTCAAGCTTGGTTTGTTTAGTA<br>TCGAGCCGAGTCTCGAGTTTTATTATCGAATATTCGAGCTCACGAGCTTATTCGAGCTTTAGTCGAA<br>CCCAAACAAGCTT                                                                                          |
| novel_mir1<br>50 | GCTAAGGTGAAAG<br>CCATTGAG              | GTAGTCGAGGTGTGGCAGTTGATAGGGCTAAGGTGAAAGCCATTGAGGAATGGCCCACGCCCAAGA<br>CATGCTCCGAGGTAAGATCTTTTCATGGTTTAGCAGGATTTTATCGTCGTTTTGTGCGTGATTTTTCATC<br>TATTGCTGCACCATTGACTGA                                                                                |

|                  |                                 |                                                                                                                                                                                                                                                                                                                                                                                     |
|------------------|---------------------------------|-------------------------------------------------------------------------------------------------------------------------------------------------------------------------------------------------------------------------------------------------------------------------------------------------------------------------------------------------------------------------------------|
| novel_mir1<br>51 | TCATCAACTTTCATA<br>GCAATTC      | ATTTGATCCATCTCCTATATATATATATATATATATATATATATATATGCGAAGGTTAACGTGAGAACCATTTTTAT<br>CATGAGAACGTGAGAACCACCAAAAAATGATGAATTCATTGTGAAAGTTGATGAATCCGTTGGAAAAGT<br>TACTGAATCCAAAAAAGAATTTTTGTCCCTCATGGGATTCGAACCAGGGTGAAAATTTCTGAATT<br>TTTGAATTCAGTCATCAACTTTCATAGCAATTCATTTGGTTTTTAGTTTTAGGATAAAAATGGTTTTCA<br>TTTGAACCCAACCTCTCTCTCTCTCTCTCTCTCTATATATATATATATATATATATAGGTAGTGGATCAA<br>A |
| novel_mir1<br>52 | TTTAAACGGGACGG<br>AGGGAG        | CGTACTCCCTCTGTCCCATTTAAAATATCTCACTTTCCTTTTTGGATTGTCCATTACAAATGTCTCATT<br>CCATTTTAGGAAATAATTATCCCTTCAAAAAGTGTGGACCCTACCCACTTTTTAACACTTTAACTACTT<br>TATACATTTCTCCTAAATAACCGTGTCCAAAAGAAAAGGGACGTTTTAAACGGGACGGAGGGAGTA<br>CT                                                                                                                                                          |
| novel_mir1<br>53 | ACGTCTTATGCATG<br>GTTCGCAGAGTTC | CATATATATATATATATAGGGGTTGGATCCAGTGAGAACTCATCTTTTATGAGAACTTGAGAACTATGC<br>ACAAACGTATAAAGTTGATGAATAAAACCTATAAAGTTGTGCATAACGAAAACATTCTAAAATTGTT<br>GCACAACAAAATAATTTTAGAAAGTTTTCGTTATGCACAACCTTATACTGTTTTGTGCATTATCTTCAA<br>CGTCTTATGCATGGTTTCGCAGAGTTCGCAAAAAAGATGTGGTTCTCATTTGATTCACTCCCTATATATA<br>TATATATATA                                                                       |
| novel_mir1<br>54 | CAAGATGACTCGTA<br>TTCCAT        | ATACTTCCTCCCTCCCATCCAAGATGACTCGTATTCCATTTTGGACTGTCCCACCCAAGATGACATGTT<br>TCCTTTTAAGGAAATAATTAACCTCTTCAAAAAGTTGTGGATCCTATCTATTTTTTATCACTTTAACCAT<br>TTATCTCTTCTCCTAAATAACCATGCCGAAAAGAAATGAGCCGTCTTGGACGGGACGGAGGGAGTAC                                                                                                                                                              |

---

|                  |                                        |                                                                                                                                                                                                                                                                                                                                                                                                                                               |
|------------------|----------------------------------------|-----------------------------------------------------------------------------------------------------------------------------------------------------------------------------------------------------------------------------------------------------------------------------------------------------------------------------------------------------------------------------------------------------------------------------------------------|
| novel_mir1<br>55 | CGTAGGAGCTTATA<br>AGTTCCGAA            | AAGAGGGTGTTCCGGCTAAACTTATTTTAGAGAGCTCATATGATGTGTCAAGAGCTTATAAGATGTAAT<br>GTCTCAAAAGCTTATAAGTTGTCAAAATGTTTGGATAATTGAACTTATAAGCTAGAGAAAAAATCGT<br>GAGTTAGAGAGAAAAATTGACATGTGAAGTTGATAGTGTATATGAAGGAATAATGAACCATAGTAAAA<br>TTATTTTGGTAAATTCATTATTATTATAAGCTTATGAAAAAATATGTTAGGATTGAGCAACTTATTTT<br>AAGAGAGTTTATAAACTGTTGGAGCTTATTTTCACAATTTATAAGTTGTTTATGAATTTATTTTGCTAAA<br>CACTTCGTAGGAGCTTATAAGTTCCGAAACAACCTTATAAGCTATTTTGACAACCAAACACCCTCTA |
| novel_mir1<br>56 | GCTTTAGACCCGGA<br>CCGTTTAGATCCAT<br>AG | CGGTTCTGGTTCTGATTCCGGTTCCAGACTCGCTTTAGACCCGGACCGTTTAGATCCATAGTTTGATG<br>GTCTGGTCCAATTCGGATCTGGTCCAGAACCAGAACTA                                                                                                                                                                                                                                                                                                                                |
| novel_mir1<br>57 | AGACTTGTAATAG<br>ACGGGTTTCTT           | ATGGGTCTTAAACGGTCCGGATCTGAGCGGATCTAGAACCAGAACCGGACAAGAACCAGAACTGA<br>AATCGAAACCGTTGCTTTATAATTTAATGGGTATGAGTGATTTTCGAATTGATATGGATAAACTAGCT<br>CATTGACAAACATATTTAACTTAGACTTGTAATAGACGGGTTTCTTTCGGACCAGAACCAATAAAT<br>AAGTAATGGTTCTGGTTCTGGATCCGACCCATTAGACACTGGATCCGGACCGGACCAGGACCATCAA<br>CTATGGGTCTTAAGCGGTCCGGATCTGAGCGGGTCTGGAACCAGAACCGGACCAGAACCAAG                                                                                      |

---

|                  |                                |                                                                                                                                                                                                                                                                                                                                                    |
|------------------|--------------------------------|----------------------------------------------------------------------------------------------------------------------------------------------------------------------------------------------------------------------------------------------------------------------------------------------------------------------------------------------------|
| novel_mir1<br>58 | CTATTTGATTGTCTT<br>CTTCAA      | TGTTACTTCCTCCGTACAGCTTAAAGTGATCATTTTCTTTTGGACACGAGTATTTAGAAAAAAGATATA<br>AAGTAGTTAAAGTGTTAAAAAGTGAGTAGAGTCCATACTTTTAAAGAGATAATTATTTCTTAAATG<br>GAATGAGACATTTGTAATAGGACAACCCAAAAAGAAAAGTAGGACATTTTAAATGGGACAGATGGA<br>GTATTTCTTTTCGGCAAACACATGCACGATCATAATAAACATTCCTATTTGATTGTCTTCTTCAAAAAC<br>TTTTGTGTTTACTTTAGTCTTTTGGAGAATTTGATAACTTTTGGGAGTGATC |
| novel_mir1<br>59 | CTGGCGGAGTGCA<br>AAGCAGCG      | GGAGCCGTATCCTGGCGGAGTGCAAAGCAGCGATGCATTGCGGACTCTACCATGGAAGCCGAATAT<br>GTAGCCGCTTCGGAGGCTTCTAAGGAGGCTGTATGGTTCA                                                                                                                                                                                                                                     |
| novel_mir1<br>60 | TGCAACAGCTTATA<br>AGCTCCTAAACA | GGGTGTTTGGCTGAGCTTATAAGCTCTTTGAAACAACCTATAAATTGTTTAGGAGCTTATTTTGCCAA<br>ACACTTTGCAACAGCTTATAAGCTCCTAAACAATTTATAAGTTGTTTTAAAGAGCTTATAAGCTCAGC<br>CAAACACTA                                                                                                                                                                                          |
| novel_mir1<br>61 | TTTTGGTGGCACGG<br>GTTTAAAGAA   | ATATACTCCCTCCGTCCACCAAAAACGTGCATCGATTTTGGTGGCACGGGTTTTAAGAAAAGTGTAAAT<br>GAGTGTAAGTAAATGTGTATAAAAAGATGTGTCATTGGGATAATAAATGAATATATTAATGGATTGT<br>GAGTGTAAGTAAAGGTGGGCCATGAGTGTTTTTTTGTAAATAAGTGGATAAGTTGAGGGTAAAAATGT<br>AAGTTAGTGTCTTAAAAAAGGAAAGTGCACATTTTGTATGGACGGATCGAAAAGGAATTAAATGC<br>ACGTTTTTGGTGGATGGAGGGAGTATAA                          |
| novel_mir1<br>62 | GTCAATGGGTGGGT<br>TTTATCCGGA   | ACAGGCACTGCACTTAGGGATGTCAATGGGTGGGTTTTATCCGGACCAGAACCAATAAATAAGTAAT<br>GGTTCGGTTCTGGATCCGACCCATTAGACACTGGATCCGGACCGGACCAGGACCATCAACTATGGG<br>TCTTAAGCGGTCCGGATCTGAGCGGGTCTGG                                                                                                                                                                       |

|                  |                                        |                                                                                                                                                                                                                                                                                                                                                                                         |
|------------------|----------------------------------------|-----------------------------------------------------------------------------------------------------------------------------------------------------------------------------------------------------------------------------------------------------------------------------------------------------------------------------------------------------------------------------------------|
| novel_mir1<br>63 | GGGAGAAGGAGAA<br>GAGAAGAAGAAGC         | AAATATAAAGTCTTAAAGGCATTGGTAAAGTCTTAGAGGCCATTGGAGGGAGAAGGAGAAGAGAA<br>GAAGAAGCGCTGCTGTGTGTTTTCTTTCTTTTAGACCGTTGCAACCTTAGTTTATATTA                                                                                                                                                                                                                                                        |
| novel_mir1<br>64 | GGGTTAGAGAGAG<br>AAAATCATAGTTAG<br>AT  | ATTCTCAAAGTTCTTCAATATAGCTCGATTGATTATGAGGGTGTTTCTTTAAATTTATTTTAAAGTACTT<br>ATAAGCTTCAAGAGCTTATAAGATATTTCAAGAGCTTATATAATATAATTTAAATAGTTTATAAATTG<br>TCAACGTGTTTGTATAATTGAGCTTATAAGCTAGAGAAAGAATCATGGGTAGAGAGAGAAAATCAT<br>AGTTAGATATAGAATTGATGAGAGG                                                                                                                                       |
| novel_mir1<br>65 | ATGAAAGATATGCT<br>ACTATTCGTA           | GAAAGATGTGCTAAACTAATATATTTAGATATGTGCTACGAATGGATGAAATATGTGCTAAACTTTTCAT<br>GTGCAATACATTAATTCTGATTGTGCTACACAATATGAAAGATATGCTACTATTCGTACTTTTCGTACAT<br>TAAGGAGCTTTCTCACCATAACCAACCCCTATATATATATATATATATAGGGGTGGTTATGGTGA<br>GAAAGCTCCTTAATGTACGAAAGTATGAATAGTAGCATATCTTTCATATTGTGTAGCACAATCAGAAT<br>TAATGTATTGCACATGAAAGTTTAGCACATATTTTCATCCATTCGTAGCACATATCTAAATATATTAGTTT<br>AGCACATCTTT |
| novel_mir1<br>66 | ATCAGAACCTGCTT<br>CATGTCCTTGATTG<br>AT | TTGGTTCTTCCCATCCTGATTCTGTTGTTTCTTGATTGATTTCTTCCCAATCAGAACATGGATTGATTTC<br>TTCCGAATCAGAACCTGCTTCATGTCCTTGATTGATTTCTTCCAAATCAGAACCTGAATCAGAACTGG<br>AAATGGGAAACGCCGC                                                                                                                                                                                                                      |
| novel_mir1<br>67 | ATATGGATAAAACT<br>AGCTCATTGA           | GTCAATGGGTGGGTTTTACCCGGACCAGAACCAATAAATAAGTAATGGTTCTGGTTCTGGATCCGAC<br>CCATTAGACACTGGATCCGGACCGGACCAGGACCATCAACTATGGGTCTTAAGCGGTCCGGATCTGA<br>GCGGGTCTGGAACCAGAATTGGAACCGAAACGTTGCTTTATAATTTAATTGGCTATGAGTGATTTAG<br>ATCGATATGGATAAAACTAGCTCATTGAG                                                                                                                                      |

|                  |                                        |                                                                                                                                                                                                                                                                                                           |
|------------------|----------------------------------------|-----------------------------------------------------------------------------------------------------------------------------------------------------------------------------------------------------------------------------------------------------------------------------------------------------------|
| novel_mir1<br>68 | AATGAGCCGTCTTG<br>GATGAAACGGA          | ATACTCCATCCGTCCCATCCAAGATGGTTCGCTTTTCTTTTGGGTTGTCCCACCCAAGATGGTCTGTT<br>TCCTTTTATAGGAAATAATTAACCTCTTCAAAAGTTGTGGGCCCTACCTATTTTTTATCACTTTAACCCT<br>TTATTTCTTCTTCTAAATAACCGTGCCGAAAAGAAATGAGCCGTCTTGGATGAAACGGAAGGAGTAG                                                                                     |
| novel_mir1<br>69 | TTACTTTGCATGATT<br>AGGTTGGATAGATA<br>A | ACCTTAAGATGGTGTTTACTTTGCATGATTAGGTTGGATAGATAAAATTAATCCAACCTAATCAAGTG<br>TTTACTTTTAAGGA                                                                                                                                                                                                                    |
| novel_mir1<br>70 | GGGATTATGGATGT<br>CGCTCA               | AGGGCGGATGTGCCATGGGCACGCAGTGAAGTTGGGAGTGGACAGTGTTTTGCCGGTGCAGAAATTC<br>CTTGTTTCATTTTTATGCTTGTTGTGGGATTATGGATGTCGCTCA                                                                                                                                                                                      |
| novel_mir1<br>71 | AAAAAGATTTGTCT<br>AAGCCACTT            | GTCAGATAGATAGATTTGCCTCAATGTATGCACTTCCGTGTACTAGCTAAAGCGTTATGAGGTTAGCG<br>ACAAAAAAGATTTGTCTAAGCCACTTCGTTTCTTTTGTCCAAGTCACTTCTTTTTTGTCCAAGTTGC<br>TAAGTAATTGCCTCATAGATCCTATATCTATCTATATGAA                                                                                                                   |
| novel_mir1<br>72 | CAATTCATAACTA<br>GTTGGTGCGT            | TAACGCTTTAGCTAGTACACGGAAGTGCATACATTGAGGCAAATCTATCTATCTGACGAGCTAGGAC<br>AAGAGTCGAGGCTGTCAGTGCAATTCATAACTAGTTGGTGCGTTC                                                                                                                                                                                      |
| novel_mir1<br>73 | TTGATAATACATCGT<br>CATATGTA            | ACAGAATCTCATACAGGTTGAGCAGATGATGGATGAAGCAGTGTTGAGCAATAGGAATATTGTCGCT<br>GAAAGATTTATACCTTGATAATACATCGTCATATGTACATATCACATGTTTTCCGCTGCAAGAACTTAA<br>GTTATGTACTAAAGTCCAAGAACATGCTTGTCATATGAATTACGGCTTTTGTTAAGGAGAATCCCCCT<br>GTTCAATTATACCTGTTTAGAGTTACAATCCCTTCTAAATCATACTTAGGTTTGAGGGGATGTGACAA<br>ATGTACTGC |

|                  |                                       |                                                                                                                                                                                                                                                                            |
|------------------|---------------------------------------|----------------------------------------------------------------------------------------------------------------------------------------------------------------------------------------------------------------------------------------------------------------------------|
| novel_mir1<br>74 | CAGATCCGGATCGG<br>ACCGGACCAT          | CTTAGGCTTGTCAATAAAACAAGTTTTAATCGGGACTAGAACCAATAAATAAGTATTGGTTCTGGTTCT<br>GAAATCAGAACCAGATCCGGATCGGACCGGACCATCAAACATATGGATCTAAACGGTTCGGGTCTAA<br>AACGAGTCTGAA                                                                                                               |
| novel_mir1<br>75 | ATGCAAAAAAGAA<br>ACATGTCA             | ATACTCCCTCCGTCCCAATATTCATGTCACGTTTTCTTTTTGGGCTGTCCCATTAAGTTGGTCCGTTTC<br>TAAAAAAGGAAACACTTTTTTACACTAAAAATTACCTCGAATTTCTGTGTCATCCACTACTTTACACACA<br>AAACACAACCTCTCTTTAATCTACAATCTACATGCAAAAAAGAAACATGTCATGAATATTGGGACGGA<br>GGGAGTAC                                        |
| novel_mir1<br>76 | GGTTAATGCCCGAA<br>GCCAA               | AGCCACATCTTCATCGTCATTACATTTGTGTGTGTTGGCCTAGTGATAGAGTGGTTAATGCCCGAAG<br>CCAAAGGTCTCGGGTTCGAGTCCACCGTGACGCAGCCTTTAAAAATTTCTGTGCTGCTCCTATTTTGT<br>GGGCG                                                                                                                       |
| novel_mir1<br>77 | TCTTAAGCGGTCCG<br>GATCTGA             | ATGGTTTTGATTCTGGAACCGATCCATTAGACACTGGATCCGGACCGGATCCGGACCATCAACTATG<br>GGTCTTAAGCGGTCCGGATCTGAGCGGATCTGGAACCAGAACTGGAACCAA                                                                                                                                                 |
| novel_mir1<br>78 | ATTCGATGTATTTTT<br>TTGTATAAAAATA      | GTAGTACTCCCTCCCTCCCAATAATACCCCGTCCTAATAATGATGGTTACTTTTTTTTGTCCCAATAATG<br>ATAGTTACTCTTTTTTACACGTAAATTAAGGAGAGTTGTGTTTTGTGTGCAAATTAGTTGGTAACATGA<br>AATTCGATGTATTTTTTTGTATAAAAATATTTTCAATTTTTTGGAACATATCTACTTAATGGGACAATTCA<br>AAAAAGAAAAGGTACCAACAAAAATGGGACGAAGGGAGTATTAA |
| novel_mir1<br>79 | GTGTGTGTGTGTTG<br>GCCTAGTGGTAGAG<br>T | ATTGGTGTGTGTGTGTTGGCCTAGTGGTAGAGTGGTTAATGCCCGAGGCTAAAGGTCTCGGGTTCGA<br>GTCCACCGTGACGCGGCCCTTTAAAAATTTCTGTATTTAATTGATCAAAAAAAGAATAAATGGGAGA<br>TTTGAGCACCCCTACTTAACCAACACCCCTACTTAACCAAC                                                                                    |

---

novel\_mir1  
80

GTCTGTTTGGTAGCT  
CTGTTTTG

TGTTTGGTAGCTCTGTTTCGTATCCTTACGGCCCGTGTTTTAATGACGGGCTTGGTGGTTTTGTCTGTTT  
GGTAGCTCTGTTTTGCACTATTTCTTTAGGATTTGTAACTACCTAAATGGTGGGTACGAAACCTAAC  
TGCACAGTACATTTTAACTAGACGAAACCTAACTAGACGAAACCTAACTAACCTACCAAACG

---

novel\_mir1  
81

TCTCACTGGATCCA  
ACCCCTATATATATA  
T

CGGTGCATTAGTTTTATACATAAAATGCATTAATTTTATACTTAAATGCATTGGTTTTTAGGTTTTTACG  
AAAAAATAGGTTCTTATTATAACTCGACCACATATATATATATATAGGGGTTGGATCAAGTGAGAAC  
TCATCTTTTTTGAGAACTTGAGAACCATGCATATGACGTTGAAGATAATGCACAAAATAGTATAAAAT  
TGTGCATAACGAAAACCTTCTAAAATTGTTGCACAACAAAATAATTTTAGAAAGTTTCGTTATGCAC  
AACTTTATACCGTTTTGTGCATCATCTTCAACGTCTTATGCATGGTTCTCAAGTTCTCAAAAAAGATGA  
GTTCTCACTGGATCCAACCCCTATATATATATATATATATATATATATAGGGGTTGGATCCAGTG  
AGAACTACATCTTTTTTGCGAACTCTGCGAACCATGCATAAGACGTGTAAAGATGATGCACAAAACG  
GTATAAAGTTGTGCACAACGAAAACCTTCTAAAATTGTTTTGTTGTGCAACAATTTTAGAATGTTTTC  
GTTGTGCACAACCTTTATAGATTTTATTCATCAACTTTATACGTCTGTGCATAGTTCTCAAGTTCTCAA  
AAAGATGAGTTCTCACTTGATCCAACCCCTATATATATATATATATGTGGTCGAGTTATAATAAGAACC  
TATTTTTTCGTAAAAACCTAAAAACCAATGCATTAAAGTATAAAATTAATGCATTTTATGTATAAACT  
AATGCACCC

---

**Table S18.** known miRNA members in each family in rosemary

| <b>miRNAs</b> | <b>Number</b> | <b>Family members</b>                                                                                        |
|---------------|---------------|--------------------------------------------------------------------------------------------------------------|
| miR6300       | 1             | miR6300                                                                                                      |
| miR6173       | 1             | miR6173                                                                                                      |
| miR5658       | 1             | miR5658                                                                                                      |
| miR5141       | 1             | miR5141                                                                                                      |
| miR1171       | 1             | miR1171                                                                                                      |
| miR858        | 1             | miR858b                                                                                                      |
| miR845        | 1             | miR845d                                                                                                      |
| miR530        | 1             | miR530a                                                                                                      |
| miR408        | 4             | miR408d、miR408b-5p_2、miR408-5p_8、miR408-3p_2                                                                 |
| miR399        | 3             | miR399b、miR399a_6、miR399_1                                                                                   |
| miR398        | 2             | miR398b、miR398a-3p                                                                                           |
| miR397        | 3             | miR397a_3、miR397-5p_1、miR397-5p                                                                              |
| miR396        | 7             | miR396h、miR396g-3p、miR396b、miR396a-5p、miR396a-3p_5、miR396a-3p_4、miR396a-3p_1                                 |
| miR172        | 1             | miR172a_4                                                                                                    |
| miR171        | 8             | miR171n-5p、miR171f_3、miR171d-5p_2、miR171d_1、miR171c_3、miR171b-3p_3、miR171b-3p、miR171a-3p_1                   |
| miR169        | 3             | miR169m、miR169e_3、miR169e_2                                                                                  |
| miR168        | 6             | miR168b_1、miR168a-5p、miR168a-3p、miR168-5p、miR168-3p、miR168                                                   |
| miR167        | 11            | miR167d-5p、miR167d_1、miR167d、miR166u、miR166m_2、miR166h-3p_1、miR166h-3p、miR166e-3p、miR166e、miR166a-3p、miR166a |
| miR160        | 4             | miR160h_1、miR160b_1、miR160a-5p、miR160                                                                        |
| miR159        | 3             | miR159c_5、miR159a_1、miR156q                                                                                  |
| miR156        | 6             | miR156k_2、miR156c、miR156b_2、miR156a-5p、miR156a_2、miR156a                                                     |

Table S19. Network of MeJA-responsive miRNAs and their targets

| CKvsM10      |      |                      | CKvsM50     |      |                     | CKvsM100     |      |                      |
|--------------|------|----------------------|-------------|------|---------------------|--------------|------|----------------------|
| miRNA id     | type | Target id            | miRNA id    | type | Target id           | miRNA id     | type | Target id            |
| miR396a-3p_4 | Up   | CL5140.Contig8_All   | novel_mir97 | Up   | CL11756.Contig7_All | miR396a-3p_4 | Up   | CL5140.Contig8_All   |
| miR396a-3p_4 | Up   | CL5140.Contig4_All   | novel_mir97 | Up   | Unigene12426_All    | miR396a-3p_4 | Up   | CL5140.Contig4_All   |
| miR396a-3p_4 | Up   | CL5140.Contig1_All   | novel_mir97 | Up   | CL8986.Contig17_All | miR396a-3p_4 | Up   | CL5140.Contig1_All   |
| miR396a-3p_4 | Up   | Unigene13456_All     | novel_mir97 | Up   | Unigene11539_All    | miR396a-3p_4 | Up   | Unigene13456_All     |
| miR396a-3p_4 | Up   | CL10745.Contig5_All  | novel_mir97 | Up   | CL11756.Contig1_All | miR396a-3p_4 | Up   | CL10745.Contig5_All  |
| miR396a-3p_4 | Up   | CL2219.Contig7_All   | novel_mir97 | Up   | Unigene9326_All     | miR396a-3p_4 | Up   | CL2219.Contig7_All   |
| miR396a-3p_4 | Up   | CL5140.Contig7_All   | novel_mir97 | Up   | CL11930.Contig3_All | miR396a-3p_4 | Up   | CL5140.Contig7_All   |
| miR396a-3p_4 | Up   | CL5140.Contig3_All   | miR160      | Up   | Unigene22926_All    | miR396a-3p_4 | Up   | CL5140.Contig3_All   |
| miR396a-3p_4 | Up   | CL6647.Contig4_All   | miR160      | Up   | CL11742.Contig5_All | miR396a-3p_4 | Up   | CL6647.Contig4_All   |
| miR396a-3p_4 | Up   | CL2219.Contig4_All   | miR396a-5p  | Up   | CL623.Contig3_All   | miR396a-3p_4 | Up   | CL2219.Contig4_All   |
| miR396a-3p_4 | Up   | Unigene25309_All     | miR396a-5p  | Up   | CL623.Contig1_All   | miR396a-3p_4 | Up   | Unigene25309_All     |
| miR396a-3p_4 | Up   | CL10745.Contig4_All  | miR396a-5p  | Up   | CL82.Contig3_All    | miR396a-3p_4 | Up   | CL10745.Contig4_All  |
| miR396a-3p_4 | Up   | CL11248.Contig15_All | miR396a-5p  | Up   | Unigene15827_All    | miR396a-3p_4 | Up   | CL11248.Contig15_All |
| miR396a-3p_4 | Up   | Unigene26657_All     | miR396a-5p  | Up   | Unigene13456_All    | miR396a-3p_4 | Up   | Unigene26657_All     |
| miR396a-3p_4 | Up   | CL10745.Contig7_All  | miR396a-5p  | Up   | Unigene35300_All    | miR396a-3p_4 | Up   | CL10745.Contig7_All  |
| miR396a-3p_4 | Up   | CL7970.Contig2_All   | miR396a-5p  | Up   | CL2267.Contig9_All  | miR396a-3p_4 | Up   | CL7970.Contig2_All   |
| miR396a-3p_4 | Up   | CL7970.Contig1_All   | miR396a-5p  | Up   | Unigene565_All      | miR396a-3p_4 | Up   | CL7970.Contig1_All   |
| miR396a-3p_4 | Up   | CL10745.Contig2_All  | miR396a-5p  | Up   | CL2267.Contig1_All  | miR396a-3p_4 | Up   | CL10745.Contig2_All  |
| miR396a-3p_4 | Up   | CL2219.Contig9_All   | miR396a-5p  | Up   | CL7970.Contig3_All  | miR396a-3p_4 | Up   | CL2219.Contig9_All   |
| miR396a-3p_4 | Up   | CL12157.Contig3_All  | miR396a-5p  | Up   | CL10458.Contig4_All | miR396a-3p_4 | Up   | CL12157.Contig3_All  |
| miR396a-3p_4 | Up   | CL12157.Contig2_All  | miR396a-5p  | Up   | CL6693.Contig6_All  | miR396a-3p_4 | Up   | CL12157.Contig2_All  |
| miR396a-3p_4 | Up   | CL10745.Contig8_All  | miR396a-5p  | Up   | CL7970.Contig1_All  | miR396a-3p_4 | Up   | CL10745.Contig8_All  |
| novel_mir97  | Up   | CL11756.Contig7_All  | miR396a-5p  | Up   | CL7970.Contig2_All  | novel_mir97  | Up   | CL11756.Contig7_All  |
| novel_mir97  | Up   | Unigene12426_All     | miR396a-5p  | Up   | CL623.Contig2_All   | novel_mir97  | Up   | Unigene12426_All     |

|              |    |                     |            |    |                     |             |    |                     |
|--------------|----|---------------------|------------|----|---------------------|-------------|----|---------------------|
| novel_mir97  | Up | CL8986.Contig17_All | miR396a-5p | Up | CL82.Contig1_All    | novel_mir97 | Up | CL8986.Contig17_All |
| novel_mir97  | Up | Unigene11539_All    | miR166e-3p | Up | Unigene23840_All    | novel_mir97 | Up | Unigene11539_All    |
| novel_mir97  | Up | CL11756.Contig1_All | miR166e-3p | Up | CL252.Contig8_All   | novel_mir97 | Up | CL11756.Contig1_All |
| novel_mir97  | Up | Unigene9326_All     | miR166e-3p | Up | CL252.Contig7_All   | novel_mir97 | Up | Unigene9326_All     |
| novel_mir97  | Up | CL11930.Contig3_All | miR166e-3p | Up | CL252.Contig9_All   | novel_mir97 | Up | CL11930.Contig3_All |
| novel_mir106 | Up | CL1290.Contig17_All | miR166e-3p | Up | CL127.Contig8_All   | miR160      | Up | Unigene22926_All    |
| novel_mir106 | Up | Unigene5040_All     | miR166e-3p | Up | CL127.Contig9_All   | miR160      | Up | CL11742.Contig5_All |
| novel_mir106 | Up | Unigene3477_All     | miR166e-3p | Up | Unigene19733_All    | miR166e-3p  | Up | Unigene23840_All    |
| novel_mir106 | Up | CL12266.Contig2_All | miR166e-3p | Up | Unigene23833_All    | miR166e-3p  | Up | CL252.Contig8_All   |
| novel_mir106 | Up | Unigene6451_All     | miR166e-3p | Up | Unigene23835_All    | miR166e-3p  | Up | CL252.Contig7_All   |
| novel_mir106 | Up | CL1290.Contig42_All | miR166e-3p | Up | CL127.Contig13_All  | miR166e-3p  | Up | CL252.Contig9_All   |
| novel_mir106 | Up | Unigene12079_All    | miR166e-3p | Up | Unigene23839_All    | miR166e-3p  | Up | CL127.Contig8_All   |
| novel_mir106 | Up | CL222.Contig47_All  | miR166e-3p | Up | CL127.Contig7_All   | miR166e-3p  | Up | CL127.Contig9_All   |
| novel_mir106 | Up | Unigene7755_All     | miR166e-3p | Up | Unigene19729_All    | miR166e-3p  | Up | Unigene19733_All    |
| novel_mir106 | Up | CL1925.Contig3_All  | miR166e-3p | Up | CL127.Contig6_All   | miR166e-3p  | Up | Unigene23833_All    |
| novel_mir106 | Up | Unigene30000_All    | miR166e-3p | Up | CL127.Contig1_All   | miR166e-3p  | Up | Unigene23835_All    |
| novel_mir106 | Up | CL994.Contig6_All   | miR166e-3p | Up | Unigene23829_All    | miR166e-3p  | Up | CL127.Contig13_All  |
| novel_mir106 | Up | Unigene6866_All     | miR166e-3p | Up | CL127.Contig12_All  | miR166e-3p  | Up | Unigene23839_All    |
| novel_mir106 | Up | CL994.Contig5_All   | miR166e-3p | Up | CL127.Contig11_All  | miR166e-3p  | Up | CL127.Contig7_All   |
| novel_mir106 | Up | CL1925.Contig1_All  | miR166e-3p | Up | CL11080.Contig3_All | miR166e-3p  | Up | Unigene19729_All    |
| novel_mir106 | Up | Unigene6520_All     | miR171b-3p | Up | CL3157.Contig1_All  | miR166e-3p  | Up | CL127.Contig6_All   |
| novel_mir106 | Up | CL12266.Contig1_All | miR171b-3p | Up | CL3157.Contig4_All  | miR166e-3p  | Up | CL127.Contig1_All   |
| miR396a-5p   | Up | CL623.Contig3_All   | miR171b-3p | Up | CL1203.Contig7_All  | miR166e-3p  | Up | Unigene23829_All    |
| miR396a-5p   | Up | CL623.Contig1_All   | miR399b    | Up | CL2276.Contig2_All  | miR166e-3p  | Up | CL127.Contig12_All  |
| miR396a-5p   | Up | CL82.Contig3_All    | miR399b    | Up | Unigene8906_All     | miR166e-3p  | Up | CL127.Contig11_All  |
| miR396a-5p   | Up | Unigene15827_All    | miR399b    | Up | CL2276.Contig5_All  | miR166e-3p  | Up | CL11080.Contig3_All |
| miR396a-5p   | Up | Unigene13456_All    | miR399b    | Up | CL2276.Contig1_All  | miR171b-3p  | Up | CL3157.Contig1_All  |
| miR396a-5p   | Up | Unigene35300_All    | miR399b    | Up | CL3187.Contig4_All  | miR171b-3p  | Up | CL3157.Contig4_All  |

|              |    |                     |           |    |                     |             |    |                     |
|--------------|----|---------------------|-----------|----|---------------------|-------------|----|---------------------|
| miR396a-5p   | Up | CL2267.Contig9_All  | miR399b   | Up | CL2276.Contig8_All  | miR171b-3p  | Up | CL1203.Contig7_All  |
| miR396a-5p   | Up | Unigene565_All      | miR399b   | Up | CL2276.Contig6_All  | miR399b     | Up | CL2276.Contig2_All  |
| miR396a-5p   | Up | CL2267.Contig1_All  | miR399b   | Up | CL11662.Contig2_All | miR399b     | Up | Unigene8906_All     |
| miR396a-5p   | Up | CL7970.Contig3_All  | miR399b   | Up | CL3187.Contig6_All  | miR399b     | Up | CL2276.Contig5_All  |
| miR396a-5p   | Up | CL10458.Contig4_All | miR399b   | Up | CL3187.Contig8_All  | miR399b     | Up | CL2276.Contig1_All  |
| miR396a-5p   | Up | CL6693.Contig6_All  | miR399b   | Up | CL2276.Contig7_All  | miR399b     | Up | CL3187.Contig4_All  |
| miR396a-5p   | Up | CL7970.Contig1_All  | miR399a_6 | Up | CL2276.Contig2_All  | miR399b     | Up | CL2276.Contig8_All  |
| miR396a-5p   | Up | CL7970.Contig2_All  | miR399a_6 | Up | CL2276.Contig5_All  | miR399b     | Up | CL2276.Contig6_All  |
| miR396a-5p   | Up | CL623.Contig2_All   | miR399a_6 | Up | CL2276.Contig1_All  | miR399b     | Up | CL11662.Contig2_All |
| miR396a-5p   | Up | CL82.Contig1_All    | miR399a_6 | Up | CL3215.Contig5_All  | miR399b     | Up | CL3187.Contig6_All  |
| novel_mir120 | Up | CL5776.Contig3_All  | miR399a_6 | Up | CL2276.Contig8_All  | miR399b     | Up | CL3187.Contig8_All  |
| novel_mir120 | Up | CL5776.Contig2_All  | miR399a_6 | Up | CL858.Contig3_All   | miR399b     | Up | CL2276.Contig7_All  |
| novel_mir120 | Up | CL6074.Contig2_All  | miR399a_6 | Up | CL2276.Contig6_All  | miR399a_6   | Up | CL2276.Contig2_All  |
| novel_mir120 | Up | CL6074.Contig7_All  | miR399a_6 | Up | CL3215.Contig3_All  | miR399a_6   | Up | CL2276.Contig5_All  |
| novel_mir120 | Up | CL6074.Contig5_All  | miR399a_6 | Up | CL3381.Contig1_All  | miR399a_6   | Up | CL2276.Contig1_All  |
| novel_mir120 | Up | CL6074.Contig10_All | miR399a_6 | Up | CL11662.Contig2_All | miR399a_6   | Up | CL3215.Contig5_All  |
| novel_mir120 | Up | CL6074.Contig4_All  | miR399a_6 | Up | CL2276.Contig7_All  | miR399a_6   | Up | CL2276.Contig8_All  |
| novel_mir120 | Up | CL957.Contig5_All   | miR399a_6 | Up | CL3215.Contig2_All  | miR399a_6   | Up | CL858.Contig3_All   |
| novel_mir120 | Up | CL11242.Contig3_All | miR399a_6 | Up | CL3215.Contig4_All  | miR399a_6   | Up | CL2276.Contig6_All  |
| novel_mir120 | Up | CL5783.Contig2_All  | miR168b_1 | Up | Unigene35241_All    | miR399a_6   | Up | CL3215.Contig3_All  |
| novel_mir120 | Up | CL6074.Contig6_All  | miR168b_1 | Up | Unigene13184_All    | miR399a_6   | Up | CL3381.Contig1_All  |
| novel_mir120 | Up | CL957.Contig1_All   | miR168b_1 | Up | CL462.Contig7_All   | miR399a_6   | Up | CL11662.Contig2_All |
| novel_mir120 | Up | CL6074.Contig11_All | miR168b_1 | Up | CL725.Contig2_All   | miR399a_6   | Up | CL2276.Contig7_All  |
| novel_mir120 | Up | Unigene20529_All    | miR168b_1 | Up | Unigene3288_All     | miR399a_6   | Up | CL3215.Contig2_All  |
| novel_mir120 | Up | CL6074.Contig3_All  | miR168b_1 | Up | Unigene3262_All     | miR399a_6   | Up | CL3215.Contig4_All  |
| novel_mir120 | Up | CL5776.Contig5_All  | miR168b_1 | Up | CL4078.Contig3_All  | novel_mir47 | Up | Unigene11437_All    |
| novel_mir120 | Up | CL5776.Contig4_All  | miR168b_1 | Up | CL1134.Contig2_All  | novel_mir47 | Up | Unigene2403_All     |
| novel_mir47  | Up | Unigene11437_All    | miR168b_1 | Up | CL4078.Contig1_All  | novel_mir47 | Up | Unigene4672_All     |

|             |    |                      |             |    |                     |             |    |                      |
|-------------|----|----------------------|-------------|----|---------------------|-------------|----|----------------------|
| novel_mir47 | Up | Unigene2403_All      | miR168b_1   | Up | CL10842.Contig4_All | novel_mir47 | Up | Unigene9755_All      |
| novel_mir47 | Up | Unigene4672_All      | miR168b_1   | Up | Unigene3326_All     | novel_mir47 | Up | CL1485.Contig4_All   |
| novel_mir47 | Up | Unigene9755_All      | miR168b_1   | Up | Unigene26983_All    | novel_mir47 | Up | Unigene7432_All      |
| novel_mir47 | Up | CL1485.Contig4_All   | miR168b_1   | Up | CL725.Contig49_All  | novel_mir47 | Up | CL11930.Contig5_All  |
| novel_mir47 | Up | Unigene7432_All      | miR168b_1   | Up | Unigene12302_All    | novel_mir47 | Up | Unigene11850_All     |
| novel_mir47 | Up | CL11930.Contig5_All  | miR168b_1   | Up | Unigene26984_All    | novel_mir47 | Up | CL11930.Contig11_All |
| novel_mir47 | Up | Unigene11850_All     | miR168b_1   | Up | Unigene26694_All    | novel_mir72 | Up | CL8205.Contig3_All   |
| novel_mir47 | Up | CL11930.Contig11_All | miR168b_1   | Up | CL1134.Contig5_All  | novel_mir72 | Up | CL2494.Contig5_All   |
| novel_mir72 | Up | CL8205.Contig3_All   | miR168b_1   | Up | CL11386.Contig5_All | novel_mir72 | Up | CL228.Contig2_All    |
| novel_mir72 | Up | CL2494.Contig5_All   | miR168b_1   | Up | CL1134.Contig3_All  | novel_mir72 | Up | CL7956.Contig1_All   |
| novel_mir72 | Up | CL228.Contig2_All    | miR168b_1   | Up | Unigene9352_All     | novel_mir72 | Up | Unigene2896_All      |
| novel_mir72 | Up | CL7956.Contig1_All   | miR168b_1   | Up | CL12178.Contig8_All | novel_mir72 | Up | CL10111.Contig3_All  |
| novel_mir72 | Up | Unigene2896_All      | miR168b_1   | Up | CL462.Contig5_All   | novel_mir72 | Up | CL11367.Contig4_All  |
| novel_mir72 | Up | CL10111.Contig3_All  | miR168b_1   | Up | CL3109.Contig3_All  | novel_mir72 | Up | CL9944.Contig2_All   |
| novel_mir72 | Up | CL11367.Contig4_All  | miR168b_1   | Up | Unigene26982_All    | novel_mir72 | Up | Unigene19898_All     |
| novel_mir72 | Up | CL9944.Contig2_All   | miR168b_1   | Up | CL3109.Contig1_All  | novel_mir72 | Up | Unigene6418_All      |
| novel_mir72 | Up | Unigene19898_All     | novel_mir72 | Up | CL8205.Contig3_All  | novel_mir72 | Up | CL4372.Contig2_All   |
| novel_mir72 | Up | Unigene6418_All      | novel_mir72 | Up | CL2494.Contig5_All  | novel_mir72 | Up | Unigene3591_All      |
| novel_mir72 | Up | CL4372.Contig2_All   | novel_mir72 | Up | CL228.Contig2_All   | novel_mir72 | Up | CL10111.Contig1_All  |
| novel_mir72 | Up | Unigene3591_All      | novel_mir72 | Up | CL7956.Contig1_All  | novel_mir72 | Up | Unigene9592_All      |
| novel_mir72 | Up | CL10111.Contig1_All  | novel_mir72 | Up | Unigene2896_All     | novel_mir72 | Up | Unigene7472_All      |
| novel_mir72 | Up | Unigene9592_All      | novel_mir72 | Up | CL10111.Contig3_All | novel_mir72 | Up | CL2494.Contig1_All   |
| novel_mir72 | Up | Unigene7472_All      | novel_mir72 | Up | CL11367.Contig4_All | novel_mir72 | Up | Unigene30896_All     |
| novel_mir72 | Up | CL2494.Contig1_All   | novel_mir72 | Up | CL9944.Contig2_All  | novel_mir72 | Up | Unigene3832_All      |
| novel_mir72 | Up | Unigene3832_All      | novel_mir72 | Up | Unigene19898_All    | novel_mir72 | Up | CL2352.Contig11_All  |
| novel_mir72 | Up | CL2352.Contig11_All  | novel_mir72 | Up | Unigene6418_All     | novel_mir72 | Up | Unigene11537_All     |
| novel_mir72 | Up | Unigene11537_All     | novel_mir72 | Up | CL4372.Contig2_All  | novel_mir72 | Up | Unigene13829_All     |
| novel_mir72 | Up | Unigene13829_All     | novel_mir72 | Up | Unigene3591_All     | novel_mir72 | Up | CL2144.Contig6_All   |

|              |    |                     |              |    |                     |              |    |                     |
|--------------|----|---------------------|--------------|----|---------------------|--------------|----|---------------------|
| novel_mir72  | Up | CL2144.Contig6_All  | novel_mir72  | Up | CL10111.Contig1_All | novel_mir72  | Up | CL9115.Contig1_All  |
| novel_mir72  | Up | CL9115.Contig1_All  | novel_mir72  | Up | Unigene9592_All     | novel_mir72  | Up | CL2144.Contig5_All  |
| novel_mir72  | Up | CL2144.Contig5_All  | novel_mir72  | Up | Unigene7472_All     | novel_mir72  | Up | CL8205.Contig4_All  |
| novel_mir72  | Up | CL8205.Contig4_All  | novel_mir72  | Up | CL2494.Contig1_All  | novel_mir72  | Up | Unigene10328_All    |
| novel_mir72  | Up | Unigene10328_All    | novel_mir72  | Up | Unigene30896_All    | novel_mir72  | Up | Unigene37588_All    |
| novel_mir72  | Up | Unigene37588_All    | novel_mir72  | Up | Unigene3832_All     | novel_mir72  | Up | CL7956.Contig6_All  |
| novel_mir72  | Up | CL7956.Contig6_All  | novel_mir72  | Up | CL2352.Contig11_All | novel_mir72  | Up | CL5977.Contig2_All  |
| novel_mir72  | Up | CL5977.Contig2_All  | novel_mir72  | Up | Unigene11537_All    | novel_mir72  | Up | CL11367.Contig6_All |
| novel_mir72  | Up | CL11367.Contig6_All | novel_mir72  | Up | Unigene13829_All    | novel_mir72  | Up | Unigene4211_All     |
| novel_mir72  | Up | Unigene4211_All     | novel_mir72  | Up | CL2144.Contig6_All  | novel_mir72  | Up | Unigene24882_All    |
| novel_mir72  | Up | Unigene24882_All    | novel_mir72  | Up | CL9115.Contig1_All  | novel_mir72  | Up | CL10048.Contig1_All |
| novel_mir72  | Up | CL10048.Contig1_All | novel_mir72  | Up | CL2144.Contig5_All  | novel_mir72  | Up | Unigene9743_All     |
| novel_mir72  | Up | Unigene9743_All     | novel_mir72  | Up | CL8205.Contig4_All  | novel_mir72  | Up | CL11367.Contig7_All |
| novel_mir72  | Up | CL11367.Contig7_All | novel_mir72  | Up | Unigene10328_All    | novel_mir72  | Up | Unigene24406_All    |
| novel_mir72  | Up | Unigene24406_All    | novel_mir72  | Up | Unigene37588_All    | novel_mir72  | Up | CL10956.Contig2_All |
| novel_mir72  | Up | CL10956.Contig2_All | novel_mir72  | Up | CL7956.Contig6_All  | novel_mir168 | Up | CL601.Contig6_All   |
| novel_mir140 | Up | Unigene3543_All     | novel_mir72  | Up | CL5977.Contig2_All  | novel_mir168 | Up | CL11469.Contig2_All |
| novel_mir140 | Up | CL11092.Contig9_All | novel_mir72  | Up | CL11367.Contig6_All | novel_mir168 | Up | CL7212.Contig3_All  |
| novel_mir140 | Up | Unigene6994_All     | novel_mir72  | Up | Unigene4211_All     | novel_mir168 | Up | Unigene14756_All    |
| novel_mir140 | Up | Unigene6703_All     | novel_mir72  | Up | Unigene24882_All    | novel_mir168 | Up | Unigene7928_All     |
| novel_mir140 | Up | Unigene11042_All    | novel_mir72  | Up | CL10048.Contig1_All | novel_mir168 | Up | Unigene5920_All     |
| novel_mir140 | Up | Unigene10722_All    | novel_mir72  | Up | Unigene9743_All     | novel_mir168 | Up | CL11469.Contig1_All |
| novel_mir90  | Up | Unigene6694_All     | novel_mir72  | Up | CL11367.Contig7_All | novel_mir168 | Up | Unigene10278_All    |
| novel_mir90  | Up | Unigene37279_All    | novel_mir72  | Up | Unigene24406_All    | novel_mir168 | Up | Unigene2414_All     |
| novel_mir90  | Up | Unigene11054_All    | novel_mir72  | Up | CL10956.Contig2_All | novel_mir168 | Up | CL9491.Contig1_All  |
| novel_mir90  | Up | Unigene16886_All    | novel_mir140 | Up | Unigene3543_All     | novel_mir168 | Up | CL9811.Contig2_All  |
| novel_mir90  | Up | CL1650.Contig2_All  | novel_mir140 | Up | CL11092.Contig9_All | novel_mir168 | Up | CL11143.Contig7_All |
| novel_mir43  | Up | Unigene20079_All    | novel_mir140 | Up | Unigene6994_All     | miR171f_3    | Up | CL3157.Contig1_All  |

|             |    |                      |              |    |                     |              |    |                      |
|-------------|----|----------------------|--------------|----|---------------------|--------------|----|----------------------|
| novel_mir43 | Up | CL3020.Contig4_All   | novel_mir140 | Up | Unigene6703_All     | miR171f_3    | Up | CL3157.Contig4_All   |
| novel_mir43 | Up | CL3020.Contig2_All   | novel_mir140 | Up | Unigene11042_All    | novel_mir11  | Up | CL11597.Contig3_All  |
| miR156a-5p  | Up | Unigene32383_All     | novel_mir140 | Up | Unigene10722_All    | novel_mir11  | Up | Unigene4441_All      |
| miR156a-5p  | Up | CL11653.Contig6_All  | miR396a-3p_5 | Up | CL5140.Contig8_All  | miR168-3p    | Up | CL4078.Contig1_All   |
| miR156a-5p  | Up | CL3247.Contig4_All   | miR396a-3p_5 | Up | CL3506.Contig7_All  | miR168-3p    | Up | CL4078.Contig3_All   |
| miR156a-5p  | Up | CL11653.Contig21_All | miR396a-3p_5 | Up | CL5140.Contig4_All  | novel_mir43  | Up | Unigene20079_All     |
| miR156a-5p  | Up | CL11653.Contig20_All | miR396a-3p_5 | Up | CL3506.Contig2_All  | novel_mir43  | Up | CL3020.Contig4_All   |
| miR156a-5p  | Up | CL5489.Contig5_All   | miR396a-3p_5 | Up | CL3025.Contig5_All  | novel_mir43  | Up | CL3020.Contig2_All   |
| miR156a-5p  | Up | CL11221.Contig3_All  | miR396a-3p_5 | Up | Unigene15223_All    | novel_mir62  | Up | CL71.Contig43_All    |
| miR156a-5p  | Up | CL11653.Contig7_All  | miR396a-3p_5 | Up | Unigene1142_All     | novel_mir62  | Up | Unigene3515_All      |
| miR156a-5p  | Up | CL11221.Contig1_All  | miR396a-3p_5 | Up | CL3506.Contig5_All  | novel_mir62  | Up | Unigene2336_All      |
| miR156a-5p  | Up | CL10499.Contig1_All  | miR396a-3p_5 | Up | CL5140.Contig3_All  | novel_mir62  | Up | Unigene8140_All      |
| miR156a-5p  | Up | CL11221.Contig2_All  | miR396a-3p_5 | Up | CL3025.Contig12_All | novel_mir62  | Up | CL11634.Contig12_All |
| miR156a-5p  | Up | Unigene20076_All     | miR396a-3p_5 | Up | Unigene26657_All    | novel_mir62  | Up | CL11827.Contig3_All  |
| miR156a-5p  | Up | CL4021.Contig2_All   | miR396a-3p_5 | Up | CL9790.Contig2_All  | novel_mir62  | Up | CL10474.Contig1_All  |
| miR156a-5p  | Up | CL4424.Contig7_All   | miR396a-3p_5 | Up | CL7970.Contig2_All  | novel_mir62  | Up | Unigene2580_All      |
| miR156a-5p  | Up | CL5489.Contig1_All   | miR396a-3p_5 | Up | CL7970.Contig1_All  | novel_mir62  | Up | CL12075.Contig17_All |
| miR156a-5p  | Up | CL4553.Contig1_All   | miR396a-3p_5 | Up | Unigene32495_All    | novel_mir62  | Up | Unigene26594_All     |
| miR156a-5p  | Up | CL4803.Contig6_All   | miR396a-3p_5 | Up | CL1165.Contig17_All | novel_mir62  | Up | Unigene4989_All      |
| miR156a-5p  | Up | CL2170.Contig2_All   | miR396a-3p_5 | Up | CL2219.Contig9_All  | novel_mir62  | Up | CL651.Contig9_All    |
| miR156a-5p  | Up | CL9049.Contig3_All   | miR396a-3p_5 | Up | CL9790.Contig1_All  | novel_mir62  | Up | Unigene34330_All     |
| miR156a-5p  | Up | CL2170.Contig8_All   | miR396a-3p_5 | Up | CL6402.Contig2_All  | novel_mir62  | Up | CL5073.Contig11_All  |
| miR156a-5p  | Up | CL2558.Contig12_All  | miR396a-3p_5 | Up | CL3025.Contig13_All | novel_mir62  | Up | CL4469.Contig2_All   |
| miR156a-5p  | Up | CL8954.Contig3_All   | miR396a-3p_5 | Up | CL1165.Contig3_All  | novel_mir62  | Up | CL651.Contig3_All    |
| miR156a-5p  | Up | CL5489.Contig2_All   | miR396a-3p_5 | Up | CL3025.Contig1_All  | novel_mir62  | Up | Unigene7005_All      |
| miR156a-5p  | Up | CL11653.Contig2_All  | miR396a-3p_5 | Up | CL5140.Contig1_All  | miR168-5p    | Up | CL4078.Contig1_All   |
| miR156a-5p  | Up | CL2558.Contig11_All  | miR396a-3p_5 | Up | CL6402.Contig3_All  | miR168-5p    | Up | CL4078.Contig3_All   |
| miR156a-5p  | Up | CL5489.Contig4_All   | miR396a-3p_5 | Up | CL10745.Contig5_All | novel_mir170 | Up | CL1071.Contig3_All   |

|            |    |                      |              |    |                      |              |    |                     |
|------------|----|----------------------|--------------|----|----------------------|--------------|----|---------------------|
| miR156a-5p | Up | CL11653.Contig19_All | miR396a-3p_5 | Up | Unigene13456_All     | novel_mir170 | Up | Unigene8115_All     |
| miR156a-5p | Up | CL2170.Contig4_All   | miR396a-3p_5 | Up | CL3025.Contig7_All   | novel_mir170 | Up | CL1071.Contig4_All  |
| miR156a-5p | Up | Unigene26237_All     | miR396a-3p_5 | Up | CL2219.Contig7_All   | miR396a-3p_5 | Up | CL5140.Contig8_All  |
| miR156a-5p | Up | Unigene20170_All     | miR396a-3p_5 | Up | CL5140.Contig7_All   | miR396a-3p_5 | Up | CL3506.Contig7_All  |
| miR156a-5p | Up | CL11653.Contig8_All  | miR396a-3p_5 | Up | CL2219.Contig4_All   | miR396a-3p_5 | Up | CL5140.Contig4_All  |
| miR156a-5p | Up | CL3247.Contig2_All   | miR396a-3p_5 | Up | CL6647.Contig4_All   | miR396a-3p_5 | Up | CL3506.Contig2_All  |
| miR156a-5p | Up | CL8954.Contig4_All   | miR396a-3p_5 | Up | CL10745.Contig2_All  | miR396a-3p_5 | Up | CL3025.Contig5_All  |
| miR156a-5p | Up | CL2170.Contig6_All   | miR396a-3p_5 | Up | CL3506.Contig4_All   | miR396a-3p_5 | Up | Unigene15223_All    |
| miR156a-5p | Up | CL8954.Contig1_All   | miR396a-3p_5 | Up | CL3025.Contig2_All   | miR396a-3p_5 | Up | Unigene1142_All     |
| miR156a-5p | Up | Unigene185_All       | novel_mir176 | Up | Unigene5058_All      | miR396a-3p_5 | Up | CL3506.Contig5_All  |
| miR156a-5p | Up | CL5489.Contig3_All   | novel_mir176 | Up | CL163.Contig3_All    | miR396a-3p_5 | Up | CL5140.Contig3_All  |
| miR168     | Up | Unigene13184_All     | novel_mir176 | Up | Unigene24445_All     | miR396a-3p_5 | Up | CL3025.Contig12_All |
| miR168     | Up | CL462.Contig7_All    | novel_mir176 | Up | CL5614.Contig4_All   | miR396a-3p_5 | Up | Unigene26657_All    |
| miR168     | Up | CL11386.Contig5_All  | novel_mir176 | Up | Unigene32511_All     | miR396a-3p_5 | Up | CL9790.Contig2_All  |
| miR168     | Up | CL4078.Contig3_All   | novel_mir176 | Up | CL12253.Contig40_All | miR396a-3p_5 | Up | CL7970.Contig2_All  |
| miR168     | Up | CL4078.Contig1_All   | novel_mir176 | Up | Unigene12217_All     | miR396a-3p_5 | Up | CL7970.Contig1_All  |
| miR168     | Up | Unigene26983_All     | novel_mir176 | Up | CL7229.Contig5_All   | miR396a-3p_5 | Up | Unigene32495_All    |
| miR168     | Up | CL462.Contig5_All    | novel_mir176 | Up | Unigene8781_All      | miR396a-3p_5 | Up | CL1165.Contig17_All |
| miR168     | Up | Unigene26982_All     | novel_mir176 | Up | Unigene3801_All      | miR396a-3p_5 | Up | CL2219.Contig9_All  |
| miR168     | Up | Unigene26984_All     | novel_mir176 | Up | CL8468.Contig3_All   | miR396a-3p_5 | Up | CL9790.Contig1_All  |
| miR168     | Up | Unigene26694_All     | novel_mir176 | Up | CL163.Contig9_All    | miR396a-3p_5 | Up | CL6402.Contig2_All  |
| miR168-5p  | Up | CL4078.Contig1_All   | novel_mir176 | Up | CL163.Contig12_All   | miR396a-3p_5 | Up | CL3025.Contig13_All |
| miR168-5p  | Up | CL4078.Contig3_All   | novel_mir176 | Up | CL3878.Contig8_All   | miR396a-3p_5 | Up | CL1165.Contig3_All  |
| miR156a    | Up | CL4803.Contig6_All   | novel_mir176 | Up | CL4883.Contig3_All   | miR396a-3p_5 | Up | CL3025.Contig1_All  |
| miR156a    | Up | CL9049.Contig3_All   | novel_mir176 | Up | Unigene9362_All      | miR396a-3p_5 | Up | CL5140.Contig1_All  |
| miR156a    | Up | CL2170.Contig2_All   | novel_mir176 | Up | CL5246.Contig1_All   | miR396a-3p_5 | Up | CL6402.Contig3_All  |
| miR156a    | Up | CL2170.Contig8_All   | novel_mir176 | Up | Unigene9623_All      | miR396a-3p_5 | Up | CL10745.Contig5_All |
| miR156a    | Up | CL11653.Contig6_All  | novel_mir176 | Up | CL6239.Contig4_All   | miR396a-3p_5 | Up | Unigene13456_All    |

|             |      |                      |              |    |                      |              |    |                     |
|-------------|------|----------------------|--------------|----|----------------------|--------------|----|---------------------|
| miR156a     | Up   | CL3247.Contig4_All   | novel_mir176 | Up | CL12253.Contig20_All | miR396a-3p_5 | Up | CL3025.Contig7_All  |
| miR156a     | Up   | CL5489.Contig2_All   | novel_mir176 | Up | Unigene3363_All      | miR396a-3p_5 | Up | CL2219.Contig7_All  |
| miR156a     | Up   | CL11653.Contig21_All | novel_mir176 | Up | CL9876.Contig18_All  | miR396a-3p_5 | Up | CL5140.Contig7_All  |
| miR156a     | Up   | CL11653.Contig2_All  | novel_mir176 | Up | CL9876.Contig16_All  | miR396a-3p_5 | Up | CL2219.Contig4_All  |
| miR156a     | Up   | CL5489.Contig4_All   | novel_mir176 | Up | Unigene12107_All     | miR396a-3p_5 | Up | CL6647.Contig4_All  |
| miR156a     | Up   | CL11653.Contig20_All | novel_mir176 | Up | CL7229.Contig3_All   | miR396a-3p_5 | Up | CL10745.Contig2_All |
| miR156a     | Up   | CL5489.Contig5_All   | novel_mir176 | Up | CL9876.Contig14_All  | miR396a-3p_5 | Up | CL3506.Contig4_All  |
| miR156a     | Up   | CL2170.Contig4_All   | novel_mir176 | Up | CL1212.Contig4_All   | miR396a-3p_5 | Up | CL3025.Contig2_All  |
| miR156a     | Up   | CL11653.Contig19_All | novel_mir176 | Up | Unigene3858_All      | novel_mir101 | Up | Unigene7460_All     |
| miR156a     | Up   | CL11653.Contig7_All  | novel_mir176 | Up | CL163.Contig10_All   | novel_mir101 | Up | Unigene9709_All     |
| miR156a     | Up   | CL11221.Contig1_All  | novel_mir176 | Up | Unigene4733_All      | novel_mir101 | Up | Unigene7468_All     |
| miR156a     | Up   | Unigene20170_All     | novel_mir176 | Up | CL9876.Contig2_All   | novel_mir101 | Up | Unigene8657_All     |
| miR156a     | Up   | CL11653.Contig8_All  | novel_mir176 | Up | CL6668.Contig11_All  | novel_mir101 | Up | Unigene10161_All    |
| miR156a     | Up   | CL3247.Contig2_All   | novel_mir176 | Up | Unigene4444_All      | novel_mir101 | Up | Unigene7152_All     |
| miR156a     | Up   | CL12256.Contig7_All  | novel_mir176 | Up | CL9876.Contig13_All  | novel_mir101 | Up | CL7502.Contig7_All  |
| miR156a     | Up   | Unigene7368_All      | novel_mir176 | Up | CL3878.Contig13_All  | novel_mir101 | Up | Unigene3049_All     |
| miR156a     | Up   | Unigene20076_All     | novel_mir176 | Up | Unigene6545_All      | novel_mir101 | Up | Unigene35289_All    |
| miR156a     | Up   | CL12256.Contig12_All | novel_mir176 | Up | CL9876.Contig17_All  | novel_mir101 | Up | CL11827.Contig8_All |
| miR156a     | Up   | CL5489.Contig1_All   | novel_mir176 | Up | CL10420.Contig2_All  | novel_mir101 | Up | Unigene4309_All     |
| miR156a     | Up   | CL2170.Contig6_All   | novel_mir176 | Up | Unigene5756_All      | novel_mir101 | Up | Unigene2941_All     |
| miR156a     | Up   | CL5489.Contig3_All   | novel_mir176 | Up | CL1212.Contig1_All   | novel_mir101 | Up | Unigene9455_All     |
| novel_mir36 | Down | Unigene30000_All     | novel_mir176 | Up | Unigene8658_All      | novel_mir101 | Up | Unigene3540_All     |
| novel_mir36 | Down | Unigene5040_All      | novel_mir176 | Up | Unigene2668_All      | novel_mir101 | Up | Unigene10331_All    |
| novel_mir36 | Down | CL994.Contig6_All    | novel_mir176 | Up | CL12323.Contig2_All  | novel_mir101 | Up | CL8130.Contig17_All |
| novel_mir36 | Down | Unigene3477_All      | novel_mir176 | Up | CL11961.Contig11_All | novel_mir101 | Up | Unigene10734_All    |
| novel_mir36 | Down | CL12266.Contig2_All  | novel_mir176 | Up | Unigene4107_All      | novel_mir101 | Up | Unigene11794_All    |
| novel_mir36 | Down | Unigene6866_All      | novel_mir176 | Up | CL163.Contig4_All    | novel_mir101 | Up | Unigene3531_All     |
| novel_mir36 | Down | CL994.Contig5_All    | novel_mir176 | Up | Unigene2556_All      | novel_mir101 | Up | Unigene4821_All     |

|              |      |                     |              |    |                     |              |      |                      |
|--------------|------|---------------------|--------------|----|---------------------|--------------|------|----------------------|
| novel_mir36  | Down | CL222.Contig47_All  | novel_mir176 | Up | Unigene2465_All     | novel_mir101 | Up   | Unigene9547_All      |
| novel_mir36  | Down | Unigene6520_All     | novel_mir176 | Up | CL6668.Contig7_All  | novel_mir101 | Up   | Unigene10661_All     |
| novel_mir36  | Down | Unigene11066_All    | novel_mir176 | Up | CL8468.Contig1_All  | novel_mir101 | Up   | Unigene5826_All      |
| novel_mir36  | Down | CL12266.Contig1_All | novel_mir176 | Up | CL10704.Contig2_All | novel_mir101 | Up   | Unigene8149_All      |
| novel_mir161 | Down | Unigene5846_All     | novel_mir176 | Up | CL11123.Contig1_All | novel_mir101 | Up   | Unigene9779_All      |
| novel_mir161 | Down | CL5937.Contig42_All | novel_mir176 | Up | CL1615.Contig4_All  | novel_mir101 | Up   | Unigene11497_All     |
| novel_mir161 | Down | CL5937.Contig55_All | novel_mir176 | Up | CL4883.Contig2_All  | miR168a-5p   | Up   | CL4078.Contig1_All   |
| novel_mir161 | Down | CL5290.Contig2_All  | novel_mir176 | Up | Unigene10699_All    | miR168a-5p   | Up   | CL4078.Contig3_All   |
| novel_mir161 | Down | CL6981.Contig1_All  | novel_mir176 | Up | CL9876.Contig8_All  | miR160a-5p   | Down | CL8053.Contig2_All   |
| novel_mir161 | Down | CL3265.Contig7_All  | novel_mir176 | Up | Unigene6405_All     | miR160a-5p   | Down | CL11742.Contig1_All  |
| novel_mir161 | Down | Unigene13971_All    | novel_mir176 | Up | CL163.Contig20_All  | miR160a-5p   | Down | CL11742.Contig4_All  |
| novel_mir161 | Down | CL5937.Contig57_All | novel_mir176 | Up | Unigene3222_All     | miR160a-5p   | Down | CL11742.Contig3_All  |
| novel_mir161 | Down | Unigene5995_All     | novel_mir176 | Up | Unigene10001_All    | miR160a-5p   | Down | CL8053.Contig3_All   |
| novel_mir161 | Down | Unigene9188_All     | novel_mir176 | Up | CL7229.Contig6_All  | miR160a-5p   | Down | CL8053.Contig1_All   |
| novel_mir161 | Down | Unigene9982_All     | novel_mir176 | Up | Unigene7911_All     | miR160a-5p   | Down | CL11742.Contig2_All  |
| novel_mir161 | Down | CL12079.Contig4_All | novel_mir176 | Up | CL12253.Contig4_All | miR160a-5p   | Down | CL7275.Contig1_All   |
| novel_mir161 | Down | Unigene11533_All    | novel_mir176 | Up | Unigene6459_All     | miR160a-5p   | Down | CL7275.Contig2_All   |
| novel_mir161 | Down | CL12282.Contig3_All | novel_mir176 | Up | Unigene15439_All    | miR167d_1    | Down | CL1264.Contig9_All   |
| novel_mir161 | Down | Unigene5935_All     | novel_mir176 | Up | CL746.Contig32_All  | miR167d_1    | Down | CL10446.Contig1_All  |
| novel_mir161 | Down | CL5937.Contig76_All | novel_mir176 | Up | CL1277.Contig4_All  | miR167d_1    | Down | Unigene9900_All      |
| novel_mir161 | Down | CL10762.Contig2_All | novel_mir176 | Up | CL1212.Contig2_All  | miR167d_1    | Down | CL1264.Contig7_All   |
| novel_mir161 | Down | CL5937.Contig2_All  | novel_mir176 | Up | CL3878.Contig4_All  | miR167d_1    | Down | CL1264.Contig1_All   |
| novel_mir67  | Down | CL7599.Contig11_All | novel_mir176 | Up | Unigene11990_All    | miR167d_1    | Down | CL10446.Contig22_All |
| novel_mir67  | Down | Unigene11166_All    | novel_mir176 | Up | Unigene37603_All    | miR167d_1    | Down | CL1085.Contig12_All  |
| novel_mir67  | Down | CL7599.Contig1_All  | novel_mir176 | Up | CL40.Contig26_All   | miR167d_1    | Down | CL7983.Contig2_All   |
| novel_mir67  | Down | Unigene10773_All    | novel_mir176 | Up | Unigene10704_All    | miR167d_1    | Down | CL1264.Contig10_All  |
| novel_mir67  | Down | CL11385.Contig2_All | novel_mir176 | Up | CL5614.Contig2_All  | miR167d_1    | Down | CL1264.Contig3_All   |
| novel_mir67  | Down | CL7599.Contig12_All | novel_mir176 | Up | CL8468.Contig2_All  | miR167d_1    | Down | CL5786.Contig2_All   |

|           |      |                      |              |    |                      |             |      |                      |
|-----------|------|----------------------|--------------|----|----------------------|-------------|------|----------------------|
| miR167d_1 | Down | CL1264.Contig9_All   | novel_mir176 | Up | Unigene6781_All      | miR167d_1   | Down | CL1264.Contig8_All   |
| miR167d_1 | Down | CL10446.Contig1_All  | novel_mir176 | Up | Unigene4272_All      | miR167d_1   | Down | CL1264.Contig11_All  |
| miR167d_1 | Down | Unigene9900_All      | novel_mir176 | Up | Unigene36819_All     | miR167d_1   | Down | Unigene16296_All     |
| miR167d_1 | Down | CL1264.Contig7_All   | novel_mir176 | Up | Unigene10799_All     | miR167d_1   | Down | CL5786.Contig8_All   |
| miR167d_1 | Down | CL1264.Contig1_All   | novel_mir176 | Up | CL2520.Contig1_All   | miR167d_1   | Down | Unigene2643_All      |
| miR167d_1 | Down | CL10446.Contig22_All | novel_mir176 | Up | CL1309.Contig2_All   | miR167d_1   | Down | CL1264.Contig4_All   |
| miR167d_1 | Down | CL1085.Contig12_All  | novel_mir176 | Up | CL10443.Contig3_All  | miR167d_1   | Down | Unigene8353_All      |
| miR167d_1 | Down | CL7983.Contig2_All   | novel_mir176 | Up | Unigene5877_All      | miR167d_1   | Down | CL3833.Contig1_All   |
| miR167d_1 | Down | CL1264.Contig10_All  | novel_mir176 | Up | Unigene4275_All      | miR167d_1   | Down | CL5786.Contig1_All   |
| miR167d_1 | Down | CL1264.Contig3_All   | novel_mir176 | Up | Unigene30367_All     | miR167d_1   | Down | CL5786.Contig7_All   |
| miR167d_1 | Down | CL5786.Contig2_All   | novel_mir176 | Up | CL12116.Contig8_All  | miR167d_1   | Down | Unigene12094_All     |
| miR167d_1 | Down | CL1264.Contig8_All   | novel_mir176 | Up | CL12106.Contig7_All  | miR167d_1   | Down | CL5786.Contig3_All   |
| miR167d_1 | Down | CL1264.Contig11_All  | novel_mir176 | Up | CL1277.Contig2_All   | miR167d_1   | Down | CL1085.Contig8_All   |
| miR167d_1 | Down | Unigene16296_All     | novel_mir176 | Up | CL11400.Contig1_All  | miR167d_1   | Down | CL10446.Contig9_All  |
| miR167d_1 | Down | CL5786.Contig8_All   | novel_mir176 | Up | Unigene3835_All      | miR167d_1   | Down | CL10446.Contig19_All |
| miR167d_1 | Down | Unigene2643_All      | novel_mir176 | Up | CL163.Contig1_All    | miR167d_1   | Down | CL10446.Contig13_All |
| miR167d_1 | Down | CL1264.Contig4_All   | novel_mir176 | Up | CL463.Contig6_All    | miR167d_1   | Down | CL1264.Contig5_All   |
| miR167d_1 | Down | Unigene8353_All      | novel_mir176 | Up | Unigene9281_All      | miR167d_1   | Down | CL1264.Contig2_All   |
| miR167d_1 | Down | CL3833.Contig1_All   | novel_mir176 | Up | CL6757.Contig1_All   | miR167d_1   | Down | CL10446.Contig4_All  |
| miR167d_1 | Down | CL5786.Contig1_All   | novel_mir176 | Up | Unigene3776_All      | miR167d_1   | Down | CL1264.Contig12_All  |
| miR167d_1 | Down | CL5786.Contig7_All   | novel_mir176 | Up | CL11400.Contig7_All  | miR167d_1   | Down | CL10446.Contig18_All |
| miR167d_1 | Down | Unigene12094_All     | novel_mir43  | Up | Unigene20079_All     | novel_mir67 | Down | CL7599.Contig11_All  |
| miR167d_1 | Down | CL5786.Contig3_All   | novel_mir43  | Up | CL3020.Contig4_All   | novel_mir67 | Down | Unigene11166_All     |
| miR167d_1 | Down | CL1085.Contig8_All   | novel_mir43  | Up | CL3020.Contig2_All   | novel_mir67 | Down | CL7599.Contig1_All   |
| miR167d_1 | Down | CL10446.Contig9_All  | novel_mir61  | Up | CL11652.Contig33_All | novel_mir67 | Down | Unigene10773_All     |
| miR167d_1 | Down | CL10446.Contig19_All | novel_mir61  | Up | Unigene4832_All      | novel_mir67 | Down | CL11385.Contig2_All  |
| miR167d_1 | Down | CL10446.Contig13_All | novel_mir61  | Up | CL11652.Contig1_All  | novel_mir67 | Down | CL7599.Contig12_All  |
| miR167d_1 | Down | CL1264.Contig5_All   | novel_mir61  | Up | CL11652.Contig29_All | miR166h-3p  | Down | Unigene23840_All     |

|              |      |                      |              |    |                      |              |      |                      |
|--------------|------|----------------------|--------------|----|----------------------|--------------|------|----------------------|
| miR167d_1    | Down | CL1264.Contig2_All   | novel_mir61  | Up | Unigene8810_All      | miR166h-3p   | Down | CL5531.Contig2_All   |
| miR167d_1    | Down | CL10446.Contig4_All  | novel_mir61  | Up | CL11652.Contig7_All  | miR166h-3p   | Down | CL252.Contig8_All    |
| miR167d_1    | Down | CL1264.Contig12_All  | novel_mir61  | Up | CL6502.Contig1_All   | miR166h-3p   | Down | CL252.Contig7_All    |
| miR167d_1    | Down | CL10446.Contig18_All | novel_mir61  | Up | CL11652.Contig23_All | miR166h-3p   | Down | CL5531.Contig5_All   |
| miR396a-3p_1 | Down | CL5140.Contig8_All   | novel_mir61  | Up | CL11652.Contig28_All | miR166h-3p   | Down | CL252.Contig9_All    |
| miR396a-3p_1 | Down | CL5140.Contig4_All   | novel_mir61  | Up | CL11514.Contig4_All  | miR166h-3p   | Down | CL127.Contig8_All    |
| miR396a-3p_1 | Down | CL5140.Contig1_All   | novel_mir61  | Up | CL6502.Contig3_All   | miR166h-3p   | Down | CL127.Contig9_All    |
| miR396a-3p_1 | Down | Unigene13456_All     | novel_mir61  | Up | CL11652.Contig32_All | miR166h-3p   | Down | Unigene19733_All     |
| miR396a-3p_1 | Down | CL10745.Contig5_All  | miR396a-3p_1 | Up | CL5140.Contig8_All   | miR166h-3p   | Down | Unigene23833_All     |
| miR396a-3p_1 | Down | CL2219.Contig7_All   | miR396a-3p_1 | Up | CL5140.Contig4_All   | miR166h-3p   | Down | Unigene23835_All     |
| miR396a-3p_1 | Down | CL5140.Contig7_All   | miR396a-3p_1 | Up | CL5140.Contig1_All   | miR166h-3p   | Down | CL127.Contig13_All   |
| miR396a-3p_1 | Down | CL5140.Contig3_All   | miR396a-3p_1 | Up | Unigene13456_All     | miR166h-3p   | Down | Unigene23839_All     |
| miR396a-3p_1 | Down | CL2219.Contig4_All   | miR396a-3p_1 | Up | CL10745.Contig5_All  | miR166h-3p   | Down | CL127.Contig7_All    |
| miR396a-3p_1 | Down | CL6647.Contig4_All   | miR396a-3p_1 | Up | CL2219.Contig7_All   | miR166h-3p   | Down | Unigene19729_All     |
| miR396a-3p_1 | Down | Unigene26657_All     | miR396a-3p_1 | Up | CL5140.Contig7_All   | miR166h-3p   | Down | CL5531.Contig6_All   |
| miR396a-3p_1 | Down | CL7970.Contig1_All   | miR396a-3p_1 | Up | CL5140.Contig3_All   | miR166h-3p   | Down | CL127.Contig6_All    |
| miR396a-3p_1 | Down | CL7970.Contig2_All   | miR396a-3p_1 | Up | CL2219.Contig4_All   | miR166h-3p   | Down | Unigene23829_All     |
| miR396a-3p_1 | Down | CL10745.Contig2_All  | miR396a-3p_1 | Up | CL6647.Contig4_All   | miR166h-3p   | Down | CL127.Contig1_All    |
| miR396a-3p_1 | Down | CL2219.Contig9_All   | miR396a-3p_1 | Up | Unigene26657_All     | miR166h-3p   | Down | CL127.Contig12_All   |
| miR396a-3p_1 | Down | CL12157.Contig3_All  | miR396a-3p_1 | Up | CL7970.Contig1_All   | miR166h-3p   | Down | CL127.Contig11_All   |
| miR396a-3p_1 | Down | CL12157.Contig2_All  | miR396a-3p_1 | Up | CL7970.Contig2_All   | miR166h-3p   | Down | CL11080.Contig3_All  |
| miR167d-5p   | Down | CL10446.Contig19_All | miR396a-3p_1 | Up | CL10745.Contig2_All  | miR171b-3p_3 | Down | CL3157.Contig1_All   |
| miR167d-5p   | Down | Unigene16296_All     | miR396a-3p_1 | Up | CL2219.Contig9_All   | miR171b-3p_3 | Down | CL3157.Contig4_All   |
| miR167d-5p   | Down | CL10446.Contig22_All | miR396a-3p_1 | Up | CL12157.Contig3_All  | miR167d-5p   | Down | CL10446.Contig19_All |
| miR167d-5p   | Down | CL7620.Contig1_All   | miR396a-3p_1 | Up | CL12157.Contig2_All  | miR167d-5p   | Down | Unigene16296_All     |
| miR167d-5p   | Down | CL7620.Contig2_All   | novel_mir73  | Up | CL823.Contig15_All   | miR167d-5p   | Down | CL10446.Contig22_All |
| miR167d-5p   | Down | CL10446.Contig18_All | novel_mir73  | Up | CL823.Contig3_All    | miR167d-5p   | Down | CL7620.Contig1_All   |
| novel_mir22  | Down | Unigene32506_All     | novel_mir73  | Up | CL823.Contig4_All    | miR167d-5p   | Down | CL7620.Contig2_All   |

|             |      |                      |              |    |                     |            |      |                      |
|-------------|------|----------------------|--------------|----|---------------------|------------|------|----------------------|
| novel_mir22 | Down | CL11936.Contig1_All  | novel_mir11  | Up | CL11597.Contig3_All | miR167d-5p | Down | CL10446.Contig18_All |
| novel_mir22 | Down | Unigene9245_All      | novel_mir11  | Up | Unigene4441_All     | miR6300    | Down | CL2760.Contig9_All   |
| novel_mir22 | Down | CL1767.Contig15_All  | novel_mir125 | Up | Unigene27688_All    | miR6300    | Down | CL4050.Contig2_All   |
| novel_mir22 | Down | CL11936.Contig3_All  | novel_mir125 | Up | CL1025.Contig6_All  | miR6300    | Down | CL4050.Contig13_All  |
| novel_mir22 | Down | CL10666.Contig2_All  | novel_mir125 | Up | CL9876.Contig6_All  | miR6300    | Down | CL11509.Contig2_All  |
| novel_mir22 | Down | CL11690.Contig11_All | novel_mir179 | Up | CL163.Contig3_All   | miR6300    | Down | CL2760.Contig2_All   |
| novel_mir22 | Down | Unigene12250_All     | novel_mir179 | Up | Unigene32511_All    | miR6300    | Down | CL11863.Contig24_All |
| novel_mir22 | Down | CL11690.Contig6_All  | novel_mir179 | Up | CL7229.Contig5_All  | miR6300    | Down | CL2896.Contig7_All   |
| novel_mir22 | Down | CL1767.Contig19_All  | novel_mir179 | Up | Unigene3801_All     | miR6300    | Down | CL12239.Contig2_All  |
| novel_mir22 | Down | Unigene23188_All     | novel_mir179 | Up | CL8468.Contig3_All  | miR6300    | Down | CL3349.Contig9_All   |
| novel_mir22 | Down | CL11936.Contig6_All  | novel_mir179 | Up | CL163.Contig9_All   | miR6300    | Down | CL2063.Contig11_All  |
| novel_mir22 | Down | CL11690.Contig3_All  | novel_mir179 | Up | CL9876.Contig6_All  | miR6300    | Down | CL4808.Contig1_All   |
| novel_mir22 | Down | CL11936.Contig2_All  | novel_mir179 | Up | CL368.Contig9_All   | miR6300    | Down | CL11863.Contig1_All  |
| novel_mir22 | Down | CL11690.Contig4_All  | novel_mir179 | Up | CL8705.Contig6_All  | miR6300    | Down | CL3661.Contig15_All  |
| novel_mir22 | Down | CL451.Contig1_All    | novel_mir179 | Up | CL3878.Contig8_All  | miR6300    | Down | CL2760.Contig7_All   |
| novel_mir22 | Down | Unigene11422_All     | novel_mir179 | Up | Unigene9362_All     | miR6300    | Down | CL9543.Contig1_All   |
| novel_mir22 | Down | Unigene10264_All     | novel_mir179 | Up | CL1737.Contig8_All  | miR6300    | Down | CL6146.Contig4_All   |
| novel_mir75 | Down | CL11927.Contig2_All  | novel_mir179 | Up | CL6753.Contig12_All | miR6300    | Down | CL3368.Contig8_All   |
| novel_mir75 | Down | CL9741.Contig7_All   | novel_mir179 | Up | CL6239.Contig4_All  | miR6300    | Down | CL4050.Contig18_All  |
| novel_mir75 | Down | CL7875.Contig1_All   | novel_mir179 | Up | CL1737.Contig9_All  | miR6300    | Down | CL1217.Contig2_All   |
| novel_mir75 | Down | CL9741.Contig6_All   | novel_mir179 | Up | Unigene12107_All    | miR6300    | Down | CL2760.Contig1_All   |
| novel_mir75 | Down | CL9741.Contig4_All   | novel_mir179 | Up | Unigene12111_All    | miR6300    | Down | CL3368.Contig5_All   |
| miR397a_3   | Down | Unigene31825_All     | novel_mir179 | Up | CL9876.Contig14_All | miR6300    | Down | CL2696.Contig4_All   |
| miR397a_3   | Down | CL5992.Contig2_All   | novel_mir179 | Up | Unigene4733_All     | miR6300    | Down | CL3661.Contig14_All  |
| miR397a_3   | Down | CL11482.Contig2_All  | novel_mir179 | Up | Unigene4444_All     | miR6300    | Down | CL6146.Contig6_All   |
| miR397a_3   | Down | CL6305.Contig6_All   | novel_mir179 | Up | CL11824.Contig4_All | miR6300    | Down | CL656.Contig8_All    |
| miR397a_3   | Down | CL5992.Contig3_All   | novel_mir179 | Up | Unigene6545_All     | miR6300    | Down | CL2696.Contig5_All   |
| miR397a_3   | Down | CL11482.Contig1_All  | novel_mir179 | Up | CL9876.Contig17_All | miR6300    | Down | CL3661.Contig2_All   |

|              |      |                      |              |    |                      |         |      |                      |
|--------------|------|----------------------|--------------|----|----------------------|---------|------|----------------------|
| miR397a_3    | Down | CL235.Contig2_All    | novel_mir179 | Up | CL59.Contig7_All     | miR6300 | Down | CL3661.Contig9_All   |
| miR397a_3    | Down | CL8692.Contig1_All   | novel_mir179 | Up | CL10467.Contig13_All | miR6300 | Down | CL4050.Contig5_All   |
| miR397a_3    | Down | CL6305.Contig7_All   | novel_mir179 | Up | CL1212.Contig1_All   | miR6300 | Down | Unigene1749_All      |
| miR397a_3    | Down | CL11442.Contig1_All  | novel_mir179 | Up | Unigene8658_All      | miR6300 | Down | Unigene36691_All     |
| miR397a_3    | Down | CL8692.Contig2_All   | novel_mir179 | Up | Unigene16780_All     | miR6300 | Down | CL2896.Contig6_All   |
| novel_mir119 | Down | Unigene3605_All      | novel_mir179 | Up | CL2997.Contig3_All   | miR6300 | Down | CL4050.Contig11_All  |
| novel_mir129 | Down | CL5381.Contig3_All   | novel_mir179 | Up | Unigene2127_All      | miR6300 | Down | CL656.Contig40_All   |
| novel_mir129 | Down | Unigene30000_All     | novel_mir179 | Up | Unigene2556_All      | miR6300 | Down | Unigene434_All       |
| novel_mir129 | Down | Unigene9369_All      | novel_mir179 | Up | CL6668.Contig7_All   | miR6300 | Down | CL4050.Contig17_All  |
| novel_mir129 | Down | CL11930.Contig2_All  | novel_mir179 | Up | Unigene10699_All     | miR6300 | Down | CL1431.Contig2_All   |
| novel_mir129 | Down | Unigene10067_All     | novel_mir179 | Up | Unigene6405_All      | miR6300 | Down | CL4050.Contig9_All   |
| novel_mir129 | Down | CL11930.Contig3_All  | novel_mir179 | Up | Unigene3222_All      | miR6300 | Down | CL3661.Contig3_All   |
| novel_mir129 | Down | CL1290.Contig27_All  | novel_mir179 | Up | CL7229.Contig6_All   | miR6300 | Down | CL11863.Contig23_All |
| novel_mir129 | Down | CL1290.Contig42_All  | novel_mir179 | Up | CL1222.Contig7_All   | miR6300 | Down | Unigene35124_All     |
| novel_mir151 | Down | Unigene3477_All      | novel_mir179 | Up | CL8705.Contig5_All   | miR6300 | Down | Unigene28554_All     |
| novel_mir151 | Down | Unigene12426_All     | novel_mir179 | Up | CL12315.Contig15_All | miR6300 | Down | CL3368.Contig4_All   |
| novel_mir151 | Down | CL1290.Contig42_All  | novel_mir179 | Up | CL1212.Contig2_All   | miR6300 | Down | CL3368.Contig9_All   |
| novel_mir151 | Down | CL222.Contig47_All   | novel_mir179 | Up | CL5614.Contig2_All   | miR6300 | Down | CL3661.Contig10_All  |
| novel_mir151 | Down | CL1925.Contig3_All   | novel_mir179 | Up | CL6753.Contig18_All  | miR6300 | Down | CL2760.Contig3_All   |
| novel_mir151 | Down | CL11286.Contig9_All  | novel_mir179 | Up | CL12315.Contig11_All | miR6300 | Down | CL1431.Contig3_All   |
| novel_mir151 | Down | CL11286.Contig28_All | novel_mir179 | Up | Unigene4272_All      | miR6300 | Down | CL656.Contig10_All   |
| novel_mir151 | Down | CL6270.Contig16_All  | novel_mir179 | Up | Unigene25992_All     | miR6300 | Down | CL6146.Contig3_All   |
| novel_mir151 | Down | CL2947.Contig1_All   | novel_mir179 | Up | CL10467.Contig17_All | miR6300 | Down | CL2760.Contig6_All   |
| novel_mir151 | Down | CL6270.Contig9_All   | novel_mir179 | Up | CL2997.Contig5_All   | miR6300 | Down | CL2063.Contig15_All  |
| novel_mir151 | Down | Unigene11539_All     | novel_mir179 | Up | Unigene11802_All     | miR6300 | Down | CL2896.Contig5_All   |
| novel_mir151 | Down | CL8022.Contig1_All   | novel_mir179 | Up | CL1277.Contig2_All   | miR6300 | Down | CL2696.Contig8_All   |
| novel_mir151 | Down | CL6270.Contig8_All   | novel_mir179 | Up | CL12206.Contig27_All | miR6300 | Down | CL2896.Contig3_All   |
| novel_mir151 | Down | CL6270.Contig3_All   | novel_mir179 | Up | CL463.Contig6_All    | miR6300 | Down | CL4050.Contig1_All   |

|              |      |                      |              |    |                     |             |      |                      |
|--------------|------|----------------------|--------------|----|---------------------|-------------|------|----------------------|
| novel_mir151 | Down | CL4511.Contig1_All   | novel_mir179 | Up | CL6757.Contig1_All  | miR6300     | Down | CL1217.Contig3_All   |
| novel_mir151 | Down | CL11930.Contig3_All  | novel_mir179 | Up | Unigene5058_All     | miR6300     | Down | CL2696.Contig10_All  |
| novel_mir151 | Down | CL12266.Contig2_All  | novel_mir179 | Up | CL2997.Contig2_All  | miR6300     | Down | CL6146.Contig5_All   |
| novel_mir151 | Down | Unigene2213_All      | novel_mir179 | Up | CL8668.Contig13_All | miR6300     | Down | CL3349.Contig4_All   |
| novel_mir151 | Down | CL291.Contig6_All    | novel_mir179 | Up | CL5614.Contig4_All  | miR6300     | Down | CL2063.Contig1_All   |
| novel_mir151 | Down | Unigene31208_All     | novel_mir179 | Up | Unigene11357_All    | miR6300     | Down | CL11946.Contig2_All  |
| novel_mir151 | Down | CL5850.Contig4_All   | novel_mir179 | Up | CL12253.Contig7_All | miR6300     | Down | CL2063.Contig2_All   |
| novel_mir151 | Down | CL994.Contig5_All    | novel_mir179 | Up | Unigene8781_All     | miR6300     | Down | CL4050.Contig4_All   |
| novel_mir151 | Down | CL8986.Contig16_All  | novel_mir179 | Up | CL10467.Contig8_All | miR6300     | Down | CL656.Contig52_All   |
| novel_mir151 | Down | CL6270.Contig1_All   | novel_mir179 | Up | CL7229.Contig2_All  | miR6300     | Down | Unigene14900_All     |
| novel_mir151 | Down | CL11286.Contig5_All  | novel_mir179 | Up | CL1222.Contig2_All  | miR6300     | Down | CL656.Contig51_All   |
| novel_mir151 | Down | CL6270.Contig6_All   | novel_mir179 | Up | CL10467.Contig6_All | miR6300     | Down | CL656.Contig7_All    |
| novel_mir151 | Down | CL11286.Contig19_All | novel_mir179 | Up | CL7296.Contig4_All  | miR6300     | Down | CL3368.Contig6_All   |
| novel_mir151 | Down | CL11286.Contig38_All | novel_mir179 | Up | Unigene7639_All     | novel_mir22 | Down | Unigene32506_All     |
| novel_mir151 | Down | Unigene5040_All      | novel_mir179 | Up | Unigene9623_All     | novel_mir22 | Down | CL11936.Contig1_All  |
| novel_mir151 | Down | CL163.Contig21_All   | novel_mir179 | Up | CL1737.Contig7_All  | novel_mir22 | Down | Unigene9245_All      |
| novel_mir151 | Down | CL5804.Contig3_All   | novel_mir179 | Up | CL1737.Contig3_All  | novel_mir22 | Down | CL1767.Contig15_All  |
| novel_mir151 | Down | Unigene10067_All     | novel_mir179 | Up | CL9876.Contig16_All | novel_mir22 | Down | CL11936.Contig3_All  |
| novel_mir151 | Down | Unigene7755_All      | novel_mir179 | Up | CL9876.Contig18_All | novel_mir22 | Down | CL10666.Contig2_All  |
| novel_mir151 | Down | Unigene9326_All      | novel_mir179 | Up | CL7229.Contig3_All  | novel_mir22 | Down | CL11690.Contig11_All |
| novel_mir151 | Down | CL11286.Contig13_All | novel_mir179 | Up | CL1212.Contig4_All  | novel_mir22 | Down | Unigene12250_All     |
| novel_mir151 | Down | Unigene255_All       | novel_mir179 | Up | Unigene3858_All     | novel_mir22 | Down | CL11690.Contig6_All  |
| novel_mir151 | Down | CL11286.Contig11_All | novel_mir179 | Up | CL163.Contig10_All  | novel_mir22 | Down | CL1767.Contig19_All  |
| novel_mir151 | Down | CL994.Contig6_All    | novel_mir179 | Up | CL4206.Contig6_All  | novel_mir22 | Down | Unigene23188_All     |
| novel_mir151 | Down | CL291.Contig16_All   | novel_mir179 | Up | CL6753.Contig13_All | novel_mir22 | Down | CL11936.Contig6_All  |
| novel_mir151 | Down | CL4040.Contig1_All   | novel_mir179 | Up | CL9876.Contig2_All  | novel_mir22 | Down | CL11690.Contig3_All  |
| novel_mir151 | Down | CL11286.Contig31_All | novel_mir179 | Up | CL6668.Contig11_All | novel_mir22 | Down | CL11936.Contig2_All  |
| novel_mir151 | Down | CL291.Contig18_All   | novel_mir179 | Up | CL1737.Contig28_All | novel_mir22 | Down | CL11690.Contig4_All  |

|              |      |                      |              |    |                     |              |      |                     |
|--------------|------|----------------------|--------------|----|---------------------|--------------|------|---------------------|
| novel_mir151 | Down | CL222.Contig44_All   | novel_mir179 | Up | CL3878.Contig13_All | novel_mir22  | Down | CL451.Contig1_All   |
| novel_mir151 | Down | CL4511.Contig2_All   | novel_mir179 | Up | CL9876.Contig13_All | novel_mir22  | Down | Unigene11422_All    |
| novel_mir151 | Down | CL11286.Contig14_All | novel_mir179 | Up | Unigene5756_All     | novel_mir22  | Down | Unigene10264_All    |
| novel_mir151 | Down | CL12266.Contig1_All  | novel_mir179 | Up | CL12323.Contig2_All | miR166u      | Down | Unigene23840_All    |
| novel_mir151 | Down | CL1290.Contig17_All  | novel_mir179 | Up | Unigene2668_All     | miR166u      | Down | CL252.Contig8_All   |
| novel_mir151 | Down | CL5937.Contig59_All  | novel_mir179 | Up | Unigene18222_All    | miR166u      | Down | CL252.Contig7_All   |
| novel_mir151 | Down | CL11286.Contig39_All | novel_mir179 | Up | CL8668.Contig16_All | miR166u      | Down | CL252.Contig9_All   |
| novel_mir151 | Down | CL291.Contig4_All    | novel_mir179 | Up | Unigene5068_All     | miR166u      | Down | CL127.Contig8_All   |
| novel_mir151 | Down | CL11930.Contig2_All  | novel_mir179 | Up | Unigene7634_All     | miR166u      | Down | CL127.Contig9_All   |
| novel_mir151 | Down | CL6270.Contig4_All   | novel_mir179 | Up | CL1222.Contig4_All  | miR166u      | Down | Unigene19733_All    |
| novel_mir151 | Down | CL11286.Contig4_All  | novel_mir179 | Up | CL1737.Contig14_All | miR166u      | Down | Unigene23833_All    |
| novel_mir151 | Down | Unigene12079_All     | novel_mir179 | Up | CL163.Contig4_All   | miR166u      | Down | Unigene23835_All    |
| novel_mir151 | Down | CL222.Contig28_All   | novel_mir179 | Up | CL12315.Contig6_All | miR166u      | Down | CL4375.Contig3_All  |
| novel_mir151 | Down | CL6270.Contig13_All  | novel_mir179 | Up | CL8668.Contig14_All | miR166u      | Down | CL127.Contig13_All  |
| novel_mir151 | Down | CL1925.Contig2_All   | novel_mir179 | Up | CL8468.Contig1_All  | miR166u      | Down | Unigene23839_All    |
| novel_mir151 | Down | CL5381.Contig3_All   | novel_mir179 | Up | Unigene2465_All     | miR166u      | Down | CL4375.Contig1_All  |
| novel_mir151 | Down | CL6270.Contig5_All   | novel_mir179 | Up | CL11123.Contig1_All | miR166u      | Down | CL127.Contig7_All   |
| novel_mir151 | Down | CL4170.Contig8_All   | novel_mir179 | Up | CL9876.Contig3_All  | miR166u      | Down | Unigene19729_All    |
| novel_mir151 | Down | Unigene23096_All     | novel_mir179 | Up | CL11594.Contig5_All | miR166u      | Down | CL127.Contig6_All   |
| novel_mir151 | Down | CL291.Contig12_All   | novel_mir179 | Up | CL9876.Contig8_All  | miR166u      | Down | Unigene23829_All    |
| novel_mir151 | Down | Unigene6866_All      | novel_mir179 | Up | CL163.Contig20_All  | miR166u      | Down | CL127.Contig1_All   |
| novel_mir151 | Down | Unigene6520_All      | novel_mir179 | Up | CL6753.Contig2_All  | miR166u      | Down | CL127.Contig12_All  |
|              |      |                      | novel_mir179 | Up | CL1737.Contig32_All | miR166u      | Down | CL127.Contig11_All  |
|              |      |                      | novel_mir179 | Up | Unigene9756_All     | miR166u      | Down | CL11080.Contig3_All |
|              |      |                      | novel_mir179 | Up | CL2997.Contig1_All  | novel_mir148 | Down | Unigene5871_All     |
|              |      |                      | novel_mir179 | Up | Unigene6459_All     | novel_mir148 | Down | Unigene8713_All     |
|              |      |                      | novel_mir179 | Up | CL3878.Contig4_All  | novel_mir48  | Down | CL3535.Contig4_All  |
|              |      |                      | novel_mir179 | Up | CL8705.Contig2_All  | novel_mir48  | Down | CL10714.Contig2_All |

|  |  |  |              |      |                     |              |      |                      |
|--|--|--|--------------|------|---------------------|--------------|------|----------------------|
|  |  |  | novel_mir179 | Up   | CL4955.Contig15_All | novel_mir151 | Down | Unigene3477_All      |
|  |  |  | novel_mir179 | Up   | CL40.Contig26_All   | novel_mir151 | Down | Unigene12426_All     |
|  |  |  | novel_mir179 | Up   | CL12315.Contig1_All | novel_mir151 | Down | CL1290.Contig42_All  |
|  |  |  | novel_mir179 | Up   | CL7996.Contig2_All  | novel_mir151 | Down | CL222.Contig47_All   |
|  |  |  | novel_mir179 | Up   | CL8468.Contig2_All  | novel_mir151 | Down | CL1925.Contig3_All   |
|  |  |  | novel_mir179 | Up   | CL2520.Contig1_All  | novel_mir151 | Down | CL11286.Contig9_All  |
|  |  |  | novel_mir179 | Up   | Unigene10799_All    | novel_mir151 | Down | CL11286.Contig28_All |
|  |  |  | novel_mir179 | Up   | CL7996.Contig1_All  | novel_mir151 | Down | CL6270.Contig16_All  |
|  |  |  | novel_mir179 | Up   | Unigene4275_All     | novel_mir151 | Down | CL2947.Contig1_All   |
|  |  |  | novel_mir179 | Up   | CL11824.Contig6_All | novel_mir151 | Down | CL6270.Contig9_All   |
|  |  |  | novel_mir179 | Up   | CL1222.Contig3_All  | novel_mir151 | Down | Unigene11539_All     |
|  |  |  | novel_mir179 | Up   | CL12116.Contig8_All | novel_mir151 | Down | CL8022.Contig1_All   |
|  |  |  | novel_mir179 | Up   | CL4206.Contig8_All  | novel_mir151 | Down | CL6270.Contig8_All   |
|  |  |  | novel_mir179 | Up   | CL368.Contig8_All   | novel_mir151 | Down | CL6270.Contig3_All   |
|  |  |  | novel_mir179 | Up   | CL11400.Contig1_All | novel_mir151 | Down | CL4511.Contig1_All   |
|  |  |  | novel_mir179 | Up   | CL163.Contig1_All   | novel_mir151 | Down | CL11930.Contig3_All  |
|  |  |  | novel_mir179 | Up   | Unigene9281_All     | novel_mir151 | Down | CL12266.Contig2_All  |
|  |  |  | novel_mir179 | Up   | CL11400.Contig7_All | novel_mir151 | Down | Unigene2213_All      |
|  |  |  | miR160a-5p   | Down | CL8053.Contig2_All  | novel_mir151 | Down | CL291.Contig6_All    |
|  |  |  | miR160a-5p   | Down | CL11742.Contig1_All | novel_mir151 | Down | Unigene31208_All     |
|  |  |  | miR160a-5p   | Down | CL11742.Contig4_All | novel_mir151 | Down | CL5850.Contig4_All   |
|  |  |  | miR160a-5p   | Down | CL11742.Contig3_All | novel_mir151 | Down | CL994.Contig5_All    |
|  |  |  | miR160a-5p   | Down | CL8053.Contig3_All  | novel_mir151 | Down | CL8986.Contig16_All  |
|  |  |  | miR160a-5p   | Down | CL8053.Contig1_All  | novel_mir151 | Down | CL6270.Contig1_All   |
|  |  |  | miR160a-5p   | Down | CL11742.Contig2_All | novel_mir151 | Down | CL11286.Contig5_All  |
|  |  |  | miR160a-5p   | Down | CL7275.Contig1_All  | novel_mir151 | Down | CL6270.Contig6_All   |
|  |  |  | miR160a-5p   | Down | CL7275.Contig2_All  | novel_mir151 | Down | CL11286.Contig19_All |
|  |  |  | miR166h-3p   | Down | Unigene23840_All    | novel_mir151 | Down | CL11286.Contig38_All |

|  |  |  |              |      |                     |              |      |                      |
|--|--|--|--------------|------|---------------------|--------------|------|----------------------|
|  |  |  | miR166h-3p   | Down | CL5531.Contig2_All  | novel_mir151 | Down | Unigene5040_All      |
|  |  |  | miR166h-3p   | Down | CL252.Contig8_All   | novel_mir151 | Down | CL163.Contig21_All   |
|  |  |  | miR166h-3p   | Down | CL252.Contig7_All   | novel_mir151 | Down | CL5804.Contig3_All   |
|  |  |  | miR166h-3p   | Down | CL5531.Contig5_All  | novel_mir151 | Down | Unigene10067_All     |
|  |  |  | miR166h-3p   | Down | CL252.Contig9_All   | novel_mir151 | Down | Unigene7755_All      |
|  |  |  | miR166h-3p   | Down | CL127.Contig8_All   | novel_mir151 | Down | Unigene9326_All      |
|  |  |  | miR166h-3p   | Down | CL127.Contig9_All   | novel_mir151 | Down | CL11286.Contig13_All |
|  |  |  | miR166h-3p   | Down | Unigene19733_All    | novel_mir151 | Down | Unigene255_All       |
|  |  |  | miR166h-3p   | Down | Unigene23833_All    | novel_mir151 | Down | CL11286.Contig11_All |
|  |  |  | miR166h-3p   | Down | Unigene23835_All    | novel_mir151 | Down | CL994.Contig6_All    |
|  |  |  | miR166h-3p   | Down | CL127.Contig13_All  | novel_mir151 | Down | CL291.Contig16_All   |
|  |  |  | miR166h-3p   | Down | Unigene23839_All    | novel_mir151 | Down | CL4040.Contig1_All   |
|  |  |  | miR166h-3p   | Down | CL127.Contig7_All   | novel_mir151 | Down | CL11286.Contig31_All |
|  |  |  | miR166h-3p   | Down | Unigene19729_All    | novel_mir151 | Down | CL291.Contig18_All   |
|  |  |  | miR166h-3p   | Down | CL5531.Contig6_All  | novel_mir151 | Down | CL222.Contig44_All   |
|  |  |  | miR166h-3p   | Down | CL127.Contig6_All   | novel_mir151 | Down | CL4511.Contig2_All   |
|  |  |  | miR166h-3p   | Down | Unigene23829_All    | novel_mir151 | Down | CL11286.Contig14_All |
|  |  |  | miR166h-3p   | Down | CL127.Contig1_All   | novel_mir151 | Down | CL12266.Contig1_All  |
|  |  |  | miR166h-3p   | Down | CL127.Contig12_All  | novel_mir151 | Down | CL1290.Contig17_All  |
|  |  |  | miR166h-3p   | Down | CL127.Contig11_All  | novel_mir151 | Down | CL5937.Contig59_All  |
|  |  |  | miR166h-3p   | Down | CL11080.Contig3_All | novel_mir151 | Down | CL11286.Contig39_All |
|  |  |  | novel_mir75  | Down | CL11927.Contig2_All | novel_mir151 | Down | CL291.Contig4_All    |
|  |  |  | novel_mir75  | Down | CL9741.Contig7_All  | novel_mir151 | Down | CL11930.Contig2_All  |
|  |  |  | novel_mir75  | Down | CL7875.Contig1_All  | novel_mir151 | Down | CL6270.Contig4_All   |
|  |  |  | novel_mir75  | Down | CL9741.Contig6_All  | novel_mir151 | Down | CL11286.Contig4_All  |
|  |  |  | novel_mir75  | Down | CL9741.Contig4_All  | novel_mir151 | Down | Unigene12079_All     |
|  |  |  | miR171b-3p_3 | Down | CL3157.Contig1_All  | novel_mir151 | Down | CL222.Contig28_All   |
|  |  |  | miR171b-3p_3 | Down | CL3157.Contig4_All  | novel_mir151 | Down | CL6270.Contig13_All  |

|  |  |  |              |      |                     |              |      |                     |
|--|--|--|--------------|------|---------------------|--------------|------|---------------------|
|  |  |  | novel_mir160 | Down | Unigene7853_All     | novel_mir151 | Down | CL1925.Contig2_All  |
|  |  |  | novel_mir160 | Down | CL9723.Contig29_All | novel_mir151 | Down | CL5381.Contig3_All  |
|  |  |  | novel_mir160 | Down | Unigene7354_All     | novel_mir151 | Down | CL6270.Contig5_All  |
|  |  |  | novel_mir160 | Down | Unigene10569_All    | novel_mir151 | Down | CL4170.Contig8_All  |
|  |  |  | novel_mir160 | Down | CL10436.Contig2_All | novel_mir151 | Down | Unigene23096_All    |
|  |  |  | novel_mir160 | Down | Unigene35573_All    | novel_mir151 | Down | CL291.Contig12_All  |
|  |  |  | novel_mir160 | Down | CL9115.Contig1_All  | novel_mir151 | Down | Unigene6866_All     |
|  |  |  | novel_mir166 | Down | Unigene7727_All     | novel_mir151 | Down | Unigene6520_All     |
|  |  |  | novel_mir166 | Down | Unigene11364_All    | novel_mir172 | Down | Unigene9713_All     |
|  |  |  | novel_mir79  | Down | Unigene19726_All    | novel_mir172 | Down | Unigene8358_All     |
|  |  |  | novel_mir79  | Down | CL1290.Contig17_All | novel_mir172 | Down | CL947.Contig1_All   |
|  |  |  | novel_mir79  | Down | Unigene33738_All    | novel_mir138 | Down | CL1673.Contig9_All  |
|  |  |  | novel_mir79  | Down | Unigene9369_All     | novel_mir138 | Down | CL1673.Contig5_All  |
|  |  |  | novel_mir79  | Down | CL1682.Contig15_All | novel_mir138 | Down | CL1673.Contig7_All  |
|  |  |  | novel_mir79  | Down | CL12266.Contig2_All | novel_mir138 | Down | CL1673.Contig4_All  |
|  |  |  | novel_mir79  | Down | Unigene12426_All    | novel_mir138 | Down | CL1673.Contig15_All |
|  |  |  | novel_mir79  | Down | CL1290.Contig42_All | novel_mir138 | Down | CL1673.Contig16_All |
|  |  |  | novel_mir79  | Down | Unigene25401_All    | novel_mir138 | Down | CL1673.Contig8_All  |
|  |  |  | novel_mir79  | Down | Unigene12079_All    |              |      |                     |
|  |  |  | novel_mir79  | Down | Unigene7755_All     |              |      |                     |
|  |  |  | novel_mir79  | Down | Unigene9326_All     |              |      |                     |
|  |  |  | novel_mir79  | Down | CL1925.Contig2_All  |              |      |                     |
|  |  |  | novel_mir79  | Down | CL1748.Contig11_All |              |      |                     |
|  |  |  | novel_mir79  | Down | Unigene10099_All    |              |      |                     |
|  |  |  | novel_mir79  | Down | CL994.Contig6_All   |              |      |                     |
|  |  |  | novel_mir79  | Down | Unigene3436_All     |              |      |                     |
|  |  |  | novel_mir79  | Down | CL1290.Contig27_All |              |      |                     |
|  |  |  | novel_mir79  | Down | Unigene6520_All     |              |      |                     |

|  |  |  |              |      |                     |  |  |  |
|--|--|--|--------------|------|---------------------|--|--|--|
|  |  |  | novel_mir79  | Down | CL8022.Contig1_All  |  |  |  |
|  |  |  | novel_mir79  | Down | Unigene35106_All    |  |  |  |
|  |  |  | novel_mir161 | Down | Unigene5846_All     |  |  |  |
|  |  |  | novel_mir161 | Down | CL5937.Contig42_All |  |  |  |
|  |  |  | novel_mir161 | Down | CL5937.Contig55_All |  |  |  |
|  |  |  | novel_mir161 | Down | CL5290.Contig2_All  |  |  |  |
|  |  |  | novel_mir161 | Down | CL6981.Contig1_All  |  |  |  |
|  |  |  | novel_mir161 | Down | CL3265.Contig7_All  |  |  |  |
|  |  |  | novel_mir161 | Down | Unigene13971_All    |  |  |  |
|  |  |  | novel_mir161 | Down | CL5937.Contig57_All |  |  |  |
|  |  |  | novel_mir161 | Down | Unigene5995_All     |  |  |  |
|  |  |  | novel_mir161 | Down | Unigene9188_All     |  |  |  |
|  |  |  | novel_mir161 | Down | Unigene9982_All     |  |  |  |
|  |  |  | novel_mir161 | Down | CL12079.Contig4_All |  |  |  |
|  |  |  | novel_mir161 | Down | Unigene11533_All    |  |  |  |
|  |  |  | novel_mir161 | Down | CL12282.Contig3_All |  |  |  |
|  |  |  | novel_mir161 | Down | Unigene5935_All     |  |  |  |
|  |  |  | novel_mir161 | Down | CL5937.Contig76_All |  |  |  |
|  |  |  | novel_mir161 | Down | CL10762.Contig2_All |  |  |  |
|  |  |  | novel_mir161 | Down | CL5937.Contig2_All  |  |  |  |
|  |  |  | novel_mir47  | Down | Unigene11437_All    |  |  |  |
|  |  |  | novel_mir47  | Down | Unigene2403_All     |  |  |  |
|  |  |  | novel_mir47  | Down | Unigene4672_All     |  |  |  |
|  |  |  | novel_mir47  | Down | Unigene9755_All     |  |  |  |
|  |  |  | novel_mir47  | Down | CL1485.Contig4_All  |  |  |  |
|  |  |  | novel_mir47  | Down | Unigene7432_All     |  |  |  |
|  |  |  | novel_mir47  | Down | CL11930.Contig5_All |  |  |  |
|  |  |  | novel_mir47  | Down | Unigene11850_All    |  |  |  |

|  |  |  |             |      |                      |  |  |
|--|--|--|-------------|------|----------------------|--|--|
|  |  |  | novel_mir47 | Down | CL11930.Contig11_All |  |  |
|  |  |  | miR167d_1   | Down | CL1264.Contig9_All   |  |  |
|  |  |  | miR167d_1   | Down | CL10446.Contig1_All  |  |  |
|  |  |  | miR167d_1   | Down | Unigene9900_All      |  |  |
|  |  |  | miR167d_1   | Down | CL1264.Contig7_All   |  |  |
|  |  |  | miR167d_1   | Down | CL1264.Contig1_All   |  |  |
|  |  |  | miR167d_1   | Down | CL10446.Contig22_All |  |  |
|  |  |  | miR167d_1   | Down | CL1085.Contig12_All  |  |  |
|  |  |  | miR167d_1   | Down | CL7983.Contig2_All   |  |  |
|  |  |  | miR167d_1   | Down | CL1264.Contig10_All  |  |  |
|  |  |  | miR167d_1   | Down | CL1264.Contig3_All   |  |  |
|  |  |  | miR167d_1   | Down | CL5786.Contig2_All   |  |  |
|  |  |  | miR167d_1   | Down | CL1264.Contig8_All   |  |  |
|  |  |  | miR167d_1   | Down | CL1264.Contig11_All  |  |  |
|  |  |  | miR167d_1   | Down | Unigene16296_All     |  |  |
|  |  |  | miR167d_1   | Down | CL5786.Contig8_All   |  |  |
|  |  |  | miR167d_1   | Down | Unigene2643_All      |  |  |
|  |  |  | miR167d_1   | Down | CL1264.Contig4_All   |  |  |
|  |  |  | miR167d_1   | Down | Unigene8353_All      |  |  |
|  |  |  | miR167d_1   | Down | CL3833.Contig1_All   |  |  |
|  |  |  | miR167d_1   | Down | CL5786.Contig1_All   |  |  |
|  |  |  | miR167d_1   | Down | CL5786.Contig7_All   |  |  |
|  |  |  | miR167d_1   | Down | Unigene12094_All     |  |  |
|  |  |  | miR167d_1   | Down | CL5786.Contig3_All   |  |  |
|  |  |  | miR167d_1   | Down | CL1085.Contig8_All   |  |  |
|  |  |  | miR167d_1   | Down | CL10446.Contig9_All  |  |  |
|  |  |  | miR167d_1   | Down | CL10446.Contig19_All |  |  |
|  |  |  | miR167d_1   | Down | CL10446.Contig13_All |  |  |

|  |  |  |            |      |                      |  |  |  |
|--|--|--|------------|------|----------------------|--|--|--|
|  |  |  | miR167d_1  | Down | CL1264.Contig5_All   |  |  |  |
|  |  |  | miR167d_1  | Down | CL1264.Contig2_All   |  |  |  |
|  |  |  | miR167d_1  | Down | CL10446.Contig4_All  |  |  |  |
|  |  |  | miR167d_1  | Down | CL1264.Contig12_All  |  |  |  |
|  |  |  | miR167d_1  | Down | CL10446.Contig18_All |  |  |  |
|  |  |  | miR167d-5p | Down | CL10446.Contig19_All |  |  |  |
|  |  |  | miR167d-5p | Down | Unigene16296_All     |  |  |  |
|  |  |  | miR167d-5p | Down | CL10446.Contig22_All |  |  |  |
|  |  |  | miR167d-5p | Down | CL7620.Contig1_All   |  |  |  |
|  |  |  | miR167d-5p | Down | CL7620.Contig2_All   |  |  |  |
|  |  |  | miR167d-5p | Down | CL10446.Contig18_All |  |  |  |
|  |  |  | miR396b    | Down | CL2423.Contig5_All   |  |  |  |
|  |  |  | miR396b    | Down | CL623.Contig1_All    |  |  |  |
|  |  |  | miR396b    | Down | CL2423.Contig3_All   |  |  |  |
|  |  |  | miR396b    | Down | Unigene13133_All     |  |  |  |
|  |  |  | miR396b    | Down | CL7762.Contig2_All   |  |  |  |
|  |  |  | miR396b    | Down | CL82.Contig3_All     |  |  |  |
|  |  |  | miR396b    | Down | CL3856.Contig7_All   |  |  |  |
|  |  |  | miR396b    | Down | CL2267.Contig9_All   |  |  |  |
|  |  |  | miR396b    | Down | CL2087.Contig1_All   |  |  |  |
|  |  |  | miR396b    | Down | CL3856.Contig8_All   |  |  |  |
|  |  |  | miR396b    | Down | CL4429.Contig2_All   |  |  |  |
|  |  |  | miR396b    | Down | CL1599.Contig7_All   |  |  |  |
|  |  |  | miR396b    | Down | CL7970.Contig2_All   |  |  |  |
|  |  |  | miR396b    | Down | CL7970.Contig1_All   |  |  |  |
|  |  |  | miR396b    | Down | Unigene13134_All     |  |  |  |
|  |  |  | miR396b    | Down | CL623.Contig2_All    |  |  |  |
|  |  |  | miR396b    | Down | Unigene8745_All      |  |  |  |

|  |  |  |              |      |                     |  |  |  |
|--|--|--|--------------|------|---------------------|--|--|--|
|  |  |  | miR396b      | Down | CL5385.Contig3_All  |  |  |  |
|  |  |  | miR396b      | Down | Unigene26211_All    |  |  |  |
|  |  |  | miR396b      | Down | CL623.Contig3_All   |  |  |  |
|  |  |  | miR396b      | Down | CL5298.Contig2_All  |  |  |  |
|  |  |  | miR396b      | Down | Unigene15827_All    |  |  |  |
|  |  |  | miR396b      | Down | CL2423.Contig8_All  |  |  |  |
|  |  |  | miR396b      | Down | Unigene13456_All    |  |  |  |
|  |  |  | miR396b      | Down | CL82.Contig2_All    |  |  |  |
|  |  |  | miR396b      | Down | CL2423.Contig6_All  |  |  |  |
|  |  |  | miR396b      | Down | CL2423.Contig7_All  |  |  |  |
|  |  |  | miR396b      | Down | CL2267.Contig1_All  |  |  |  |
|  |  |  | miR396b      | Down | CL7970.Contig3_All  |  |  |  |
|  |  |  | miR396b      | Down | CL3856.Contig4_All  |  |  |  |
|  |  |  | miR396b      | Down | Unigene20205_All    |  |  |  |
|  |  |  | miR396b      | Down | CL10458.Contig4_All |  |  |  |
|  |  |  | miR396b      | Down | CL1599.Contig4_All  |  |  |  |
|  |  |  | miR396b      | Down | CL2423.Contig4_All  |  |  |  |
|  |  |  | miR396b      | Down | CL82.Contig1_All    |  |  |  |
|  |  |  | novel_mir56  | Down | CL5937.Contig55_All |  |  |  |
|  |  |  | novel_mir56  | Down | CL12282.Contig3_All |  |  |  |
|  |  |  | novel_mir56  | Down | CL5937.Contig76_All |  |  |  |
|  |  |  | novel_mir56  | Down | CL7137.Contig6_All  |  |  |  |
|  |  |  | novel_mir56  | Down | Unigene25894_All    |  |  |  |
|  |  |  | novel_mir56  | Down | Unigene32827_All    |  |  |  |
|  |  |  | novel_mir56  | Down | CL2960.Contig3_All  |  |  |  |
|  |  |  | novel_mir138 | Down | CL1673.Contig9_All  |  |  |  |
|  |  |  | novel_mir138 | Down | CL1673.Contig5_All  |  |  |  |
|  |  |  | novel_mir138 | Down | CL1673.Contig7_All  |  |  |  |

|  |  |  |              |      |                      |  |  |  |
|--|--|--|--------------|------|----------------------|--|--|--|
|  |  |  | novel_mir138 | Down | CL1673.Contig4_All   |  |  |  |
|  |  |  | novel_mir138 | Down | CL1673.Contig15_All  |  |  |  |
|  |  |  | novel_mir138 | Down | CL1673.Contig16_All  |  |  |  |
|  |  |  | novel_mir138 | Down | CL1673.Contig8_All   |  |  |  |
|  |  |  | novel_mir13  | Down | Unigene4506_All      |  |  |  |
|  |  |  | novel_mir13  | Down | CL11652.Contig31_All |  |  |  |
|  |  |  | novel_mir13  | Down | Unigene6986_All      |  |  |  |
|  |  |  | novel_mir13  | Down | Unigene4130_All      |  |  |  |
|  |  |  | novel_mir13  | Down | Unigene11664_All     |  |  |  |
|  |  |  | novel_mir48  | Down | CL3535.Contig4_All   |  |  |  |
|  |  |  | novel_mir48  | Down | CL10714.Contig2_All  |  |  |  |
|  |  |  | miR396h      | Down | CL2423.Contig5_All   |  |  |  |
|  |  |  | miR396h      | Down | CL623.Contig3_All    |  |  |  |
|  |  |  | miR396h      | Down | CL623.Contig1_All    |  |  |  |
|  |  |  | miR396h      | Down | CL5884.Contig4_All   |  |  |  |
|  |  |  | miR396h      | Down | CL5298.Contig2_All   |  |  |  |
|  |  |  | miR396h      | Down | CL2423.Contig3_All   |  |  |  |
|  |  |  | miR396h      | Down | CL845.Contig5_All    |  |  |  |
|  |  |  | miR396h      | Down | CL7762.Contig2_All   |  |  |  |
|  |  |  | miR396h      | Down | CL82.Contig3_All     |  |  |  |
|  |  |  | miR396h      | Down | Unigene15827_All     |  |  |  |
|  |  |  | miR396h      | Down | CL2423.Contig8_All   |  |  |  |
|  |  |  | miR396h      | Down | CL845.Contig8_All    |  |  |  |
|  |  |  | miR396h      | Down | Unigene13456_All     |  |  |  |
|  |  |  | miR396h      | Down | CL2267.Contig9_All   |  |  |  |
|  |  |  | miR396h      | Down | CL2423.Contig6_All   |  |  |  |
|  |  |  | miR396h      | Down | Unigene15795_All     |  |  |  |
|  |  |  | miR396h      | Down | CL2267.Contig1_All   |  |  |  |

|  |  |  |             |      |                     |  |  |  |
|--|--|--|-------------|------|---------------------|--|--|--|
|  |  |  | miR396h     | Down | CL845.Contig6_All   |  |  |  |
|  |  |  | miR396h     | Down | CL7970.Contig3_All  |  |  |  |
|  |  |  | miR396h     | Down | Unigene20205_All    |  |  |  |
|  |  |  | miR396h     | Down | CL10458.Contig4_All |  |  |  |
|  |  |  | miR396h     | Down | CL845.Contig2_All   |  |  |  |
|  |  |  | miR396h     | Down | CL7970.Contig2_All  |  |  |  |
|  |  |  | miR396h     | Down | CL2423.Contig4_All  |  |  |  |
|  |  |  | miR396h     | Down | CL7970.Contig1_All  |  |  |  |
|  |  |  | miR396h     | Down | CL8399.Contig3_All  |  |  |  |
|  |  |  | miR396h     | Down | CL623.Contig2_All   |  |  |  |
|  |  |  | miR396h     | Down | Unigene8745_All     |  |  |  |
|  |  |  | miR396h     | Down | CL845.Contig7_All   |  |  |  |
|  |  |  | miR396h     | Down | CL82.Contig1_All    |  |  |  |
|  |  |  | novel_mir76 | Down | CL9741.Contig7_All  |  |  |  |
|  |  |  | novel_mir76 | Down | CL9741.Contig4_All  |  |  |  |
|  |  |  | novel_mir82 | Down | CL601.Contig6_All   |  |  |  |
|  |  |  | novel_mir82 | Down | CL11469.Contig2_All |  |  |  |
|  |  |  | novel_mir82 | Down | Unigene5060_All     |  |  |  |
|  |  |  | novel_mir82 | Down | Unigene14756_All    |  |  |  |
|  |  |  | novel_mir82 | Down | CL601.Contig4_All   |  |  |  |
|  |  |  | novel_mir82 | Down | Unigene5920_All     |  |  |  |
|  |  |  | novel_mir82 | Down | CL9491.Contig1_All  |  |  |  |
|  |  |  | novel_mir82 | Down | CL9234.Contig4_All  |  |  |  |
|  |  |  | novel_mir82 | Down | Unigene3546_All     |  |  |  |
|  |  |  | novel_mir82 | Down | CL7212.Contig3_All  |  |  |  |
|  |  |  | novel_mir82 | Down | Unigene11428_All    |  |  |  |
|  |  |  | novel_mir82 | Down | CL11469.Contig1_All |  |  |  |
|  |  |  | novel_mir82 | Down | Unigene10145_All    |  |  |  |

|  |  |  |              |      |                     |  |  |  |
|--|--|--|--------------|------|---------------------|--|--|--|
|  |  |  | novel_mir82  | Down | Unigene10278_All    |  |  |  |
|  |  |  | novel_mir82  | Down | Unigene2414_All     |  |  |  |
|  |  |  | novel_mir82  | Down | CL9811.Contig2_All  |  |  |  |
|  |  |  | novel_mir82  | Down | CL11143.Contig7_All |  |  |  |
|  |  |  | novel_mir45  | Down | CL3161.Contig4_All  |  |  |  |
|  |  |  | novel_mir45  | Down | Unigene12033_All    |  |  |  |
|  |  |  | novel_mir45  | Down | CL5618.Contig2_All  |  |  |  |
|  |  |  | novel_mir45  | Down | CL5618.Contig1_All  |  |  |  |
|  |  |  | novel_mir148 | Down | Unigene5871_All     |  |  |  |
|  |  |  | novel_mir148 | Down | Unigene8713_All     |  |  |  |
|  |  |  | miR166h-3p_1 | Down | Unigene23840_All    |  |  |  |
|  |  |  | miR166h-3p_1 | Down | CL252.Contig8_All   |  |  |  |
|  |  |  | miR166h-3p_1 | Down | CL252.Contig7_All   |  |  |  |
|  |  |  | miR166h-3p_1 | Down | CL252.Contig9_All   |  |  |  |
|  |  |  | miR166h-3p_1 | Down | CL127.Contig8_All   |  |  |  |
|  |  |  | miR166h-3p_1 | Down | CL127.Contig9_All   |  |  |  |
|  |  |  | miR166h-3p_1 | Down | Unigene19733_All    |  |  |  |
|  |  |  | miR166h-3p_1 | Down | Unigene23833_All    |  |  |  |
|  |  |  | miR166h-3p_1 | Down | Unigene23835_All    |  |  |  |
|  |  |  | miR166h-3p_1 | Down | CL127.Contig13_All  |  |  |  |
|  |  |  | miR166h-3p_1 | Down | Unigene23839_All    |  |  |  |
|  |  |  | miR166h-3p_1 | Down | CL127.Contig7_All   |  |  |  |
|  |  |  | miR166h-3p_1 | Down | Unigene19729_All    |  |  |  |
|  |  |  | miR166h-3p_1 | Down | CL127.Contig6_All   |  |  |  |
|  |  |  | miR166h-3p_1 | Down | CL127.Contig1_All   |  |  |  |
|  |  |  | miR166h-3p_1 | Down | Unigene23829_All    |  |  |  |
|  |  |  | miR166h-3p_1 | Down | CL127.Contig12_All  |  |  |  |
|  |  |  | miR166h-3p_1 | Down | CL127.Contig11_All  |  |  |  |

|  |  |  |              |      |                      |  |  |  |
|--|--|--|--------------|------|----------------------|--|--|--|
|  |  |  | miR166h-3p_1 | Down | CL11080.Contig3_All  |  |  |  |
|  |  |  | novel_mir119 | Down | Unigene3605_All      |  |  |  |
|  |  |  | miR171d_1    | Down | CL9585.Contig3_All   |  |  |  |
|  |  |  | miR171d_1    | Down | CL3157.Contig1_All   |  |  |  |
|  |  |  | miR171d_1    | Down | Unigene28645_All     |  |  |  |
|  |  |  | miR171d_1    | Down | CL3157.Contig4_All   |  |  |  |
|  |  |  | miR171d_1    | Down | CL9585.Contig1_All   |  |  |  |
|  |  |  | novel_mir42  | Down | CL2960.Contig3_All   |  |  |  |
|  |  |  | miR398b      | Down | CL11427.Contig26_All |  |  |  |
|  |  |  | miR398b      | Down | CL11427.Contig12_All |  |  |  |
|  |  |  | miR398b      | Down | Unigene14301_All     |  |  |  |
|  |  |  | miR398b      | Down | CL11427.Contig24_All |  |  |  |
|  |  |  | miR398b      | Down | Unigene3694_All      |  |  |  |
|  |  |  | miR398b      | Down | Unigene18261_All     |  |  |  |
|  |  |  | miR398b      | Down | Unigene7736_All      |  |  |  |
|  |  |  | miR398b      | Down | CL4864.Contig1_All   |  |  |  |
|  |  |  | miR398b      | Down | CL11427.Contig22_All |  |  |  |
|  |  |  | miR398b      | Down | Unigene18921_All     |  |  |  |
|  |  |  | miR398b      | Down | Unigene13750_All     |  |  |  |
|  |  |  | miR398b      | Down | CL11427.Contig6_All  |  |  |  |
|  |  |  | miR398b      | Down | CL11427.Contig10_All |  |  |  |
|  |  |  | miR398b      | Down | CL11427.Contig11_All |  |  |  |
|  |  |  | miR398b      | Down | CL11427.Contig19_All |  |  |  |
|  |  |  | miR398b      | Down | Unigene11550_All     |  |  |  |
|  |  |  | novel_mir81  | Down | CL11351.Contig2_All  |  |  |  |
|  |  |  | miR171f_3    | Down | CL3157.Contig1_All   |  |  |  |
|  |  |  | miR171f_3    | Down | CL3157.Contig4_All   |  |  |  |
|  |  |  | novel_mir63  | Down | Unigene5834_All      |  |  |  |

|  |  |  |             |      |                     |  |  |  |
|--|--|--|-------------|------|---------------------|--|--|--|
|  |  |  | novel_mir63 | Down | Unigene5561_All     |  |  |  |
|  |  |  | novel_mir63 | Down | Unigene9662_All     |  |  |  |
|  |  |  | novel_mir63 | Down | Unigene31590_All    |  |  |  |
|  |  |  | novel_mir63 | Down | CL968.Contig1_All   |  |  |  |
|  |  |  | novel_mir63 | Down | CL3247.Contig4_All  |  |  |  |
|  |  |  | novel_mir63 | Down | CL7082.Contig1_All  |  |  |  |
|  |  |  | novel_mir63 | Down | CL5952.Contig6_All  |  |  |  |
|  |  |  | novel_mir63 | Down | Unigene27384_All    |  |  |  |
|  |  |  | novel_mir63 | Down | CL2369.Contig5_All  |  |  |  |
|  |  |  | novel_mir63 | Down | CL5791.Contig1_All  |  |  |  |
|  |  |  | novel_mir63 | Down | CL5791.Contig2_All  |  |  |  |
|  |  |  | novel_mir63 | Down | Unigene749_All      |  |  |  |
|  |  |  | novel_mir63 | Down | CL7082.Contig3_All  |  |  |  |
|  |  |  | novel_mir63 | Down | CL6547.Contig5_All  |  |  |  |
|  |  |  | novel_mir63 | Down | Unigene5714_All     |  |  |  |
|  |  |  | novel_mir63 | Down | CL9383.Contig2_All  |  |  |  |
|  |  |  | novel_mir63 | Down | CL9365.Contig2_All  |  |  |  |
|  |  |  | novel_mir63 | Down | Unigene32862_All    |  |  |  |
|  |  |  | novel_mir63 | Down | Unigene12036_All    |  |  |  |
|  |  |  | novel_mir63 | Down | CL10158.Contig1_All |  |  |  |
|  |  |  | novel_mir63 | Down | Unigene3127_All     |  |  |  |
|  |  |  | novel_mir63 | Down | Unigene17114_All    |  |  |  |
|  |  |  | novel_mir63 | Down | Unigene27383_All    |  |  |  |
|  |  |  | novel_mir63 | Down | CL5952.Contig5_All  |  |  |  |
|  |  |  | novel_mir63 | Down | Unigene31338_All    |  |  |  |
|  |  |  | novel_mir63 | Down | Unigene21086_All    |  |  |  |
|  |  |  | novel_mir63 | Down | Unigene3301_All     |  |  |  |
|  |  |  | novel_mir63 | Down | CL5592.Contig4_All  |  |  |  |

|  |  |  |              |      |                     |  |  |  |
|--|--|--|--------------|------|---------------------|--|--|--|
|  |  |  | novel_mir63  | Down | CL5952.Contig2_All  |  |  |  |
|  |  |  | novel_mir63  | Down | CL3247.Contig2_All  |  |  |  |
|  |  |  | novel_mir63  | Down | CL12229.Contig2_All |  |  |  |
|  |  |  | novel_mir63  | Down | CL5952.Contig14_All |  |  |  |
|  |  |  | novel_mir63  | Down | CL12229.Contig1_All |  |  |  |
|  |  |  | novel_mir63  | Down | CL12277.Contig5_All |  |  |  |
|  |  |  | novel_mir63  | Down | CL5952.Contig7_All  |  |  |  |
|  |  |  | novel_mir63  | Down | Unigene22412_All    |  |  |  |
|  |  |  | novel_mir63  | Down | CL2211.Contig3_All  |  |  |  |
|  |  |  | novel_mir175 | Down | CL10766.Contig1_All |  |  |  |
|  |  |  | novel_mir175 | Down | CL7703.Contig2_All  |  |  |  |
|  |  |  | novel_mir175 | Down | Unigene8883_All     |  |  |  |
|  |  |  | novel_mir175 | Down | Unigene5705_All     |  |  |  |
|  |  |  | novel_mir175 | Down | CL10766.Contig2_All |  |  |  |
|  |  |  | novel_mir175 | Down | CL3501.Contig3_All  |  |  |  |
|  |  |  | novel_mir175 | Down | CL10766.Contig4_All |  |  |  |
|  |  |  | novel_mir175 | Down | CL10766.Contig3_All |  |  |  |
|  |  |  | novel_mir29  | Down | CL12229.Contig3_All |  |  |  |
|  |  |  | novel_mir29  | Down | CL11787.Contig1_All |  |  |  |
|  |  |  | novel_mir29  | Down | Unigene8173_All     |  |  |  |
|  |  |  | novel_mir29  | Down | Unigene11403_All    |  |  |  |
|  |  |  | novel_mir29  | Down | Unigene12089_All    |  |  |  |
|  |  |  | novel_mir29  | Down | Unigene31338_All    |  |  |  |
|  |  |  | novel_mir29  | Down | Unigene5795_All     |  |  |  |
|  |  |  | novel_mir29  | Down | CL968.Contig2_All   |  |  |  |
|  |  |  | novel_mir29  | Down | Unigene8536_All     |  |  |  |
|  |  |  | miR166a-3p   | Down | Unigene23840_All    |  |  |  |
|  |  |  | miR166a-3p   | Down | CL252.Contig8_All   |  |  |  |

|  |  |  |            |      |                     |  |  |  |
|--|--|--|------------|------|---------------------|--|--|--|
|  |  |  | miR166a-3p | Down | CL252.Contig7_All   |  |  |  |
|  |  |  | miR166a-3p | Down | CL252.Contig9_All   |  |  |  |
|  |  |  | miR166a-3p | Down | CL127.Contig8_All   |  |  |  |
|  |  |  | miR166a-3p | Down | CL127.Contig9_All   |  |  |  |
|  |  |  | miR166a-3p | Down | Unigene19733_All    |  |  |  |
|  |  |  | miR166a-3p | Down | Unigene23833_All    |  |  |  |
|  |  |  | miR166a-3p | Down | Unigene23835_All    |  |  |  |
|  |  |  | miR166a-3p | Down | CL127.Contig13_All  |  |  |  |
|  |  |  | miR166a-3p | Down | Unigene23839_All    |  |  |  |
|  |  |  | miR166a-3p | Down | CL127.Contig7_All   |  |  |  |
|  |  |  | miR166a-3p | Down | Unigene19729_All    |  |  |  |
|  |  |  | miR166a-3p | Down | CL127.Contig6_All   |  |  |  |
|  |  |  | miR166a-3p | Down | CL127.Contig1_All   |  |  |  |
|  |  |  | miR166a-3p | Down | Unigene23829_All    |  |  |  |
|  |  |  | miR166a-3p | Down | CL127.Contig12_All  |  |  |  |
|  |  |  | miR166a-3p | Down | CL127.Contig11_All  |  |  |  |
|  |  |  | miR166a-3p | Down | CL11080.Contig3_All |  |  |  |
|  |  |  | novel_mir4 | Down | Unigene2940_All     |  |  |  |
|  |  |  | novel_mir4 | Down | CL11928.Contig6_All |  |  |  |
|  |  |  | novel_mir4 | Down | CL74.Contig15_All   |  |  |  |
|  |  |  | novel_mir4 | Down | Unigene4884_All     |  |  |  |
|  |  |  | novel_mir4 | Down | CL5937.Contig44_All |  |  |  |
|  |  |  | novel_mir4 | Down | Unigene28660_All    |  |  |  |
|  |  |  | novel_mir4 | Down | CL11928.Contig1_All |  |  |  |
|  |  |  | novel_mir4 | Down | CL581.Contig9_All   |  |  |  |
|  |  |  | novel_mir4 | Down | Unigene3898_All     |  |  |  |
|  |  |  | novel_mir4 | Down | Unigene2549_All     |  |  |  |
|  |  |  | novel_mir4 | Down | CL4833.Contig3_All  |  |  |  |

|  |  |  |            |      |                      |  |  |  |
|--|--|--|------------|------|----------------------|--|--|--|
|  |  |  | novel_mir4 | Down | CL3783.Contig5_All   |  |  |  |
|  |  |  | novel_mir4 | Down | Unigene36625_All     |  |  |  |
|  |  |  | novel_mir4 | Down | CL1489.Contig15_All  |  |  |  |
|  |  |  | novel_mir4 | Down | CL329.Contig23_All   |  |  |  |
|  |  |  | novel_mir4 | Down | CL1390.Contig7_All   |  |  |  |
|  |  |  | novel_mir4 | Down | Unigene8309_All      |  |  |  |
|  |  |  | novel_mir4 | Down | CL581.Contig2_All    |  |  |  |
|  |  |  | novel_mir4 | Down | CL7613.Contig9_All   |  |  |  |
|  |  |  | novel_mir4 | Down | CL11928.Contig4_All  |  |  |  |
|  |  |  | novel_mir4 | Down | CL9183.Contig4_All   |  |  |  |
|  |  |  | novel_mir4 | Down | CL11823.Contig1_All  |  |  |  |
|  |  |  | novel_mir4 | Down | CL7613.Contig2_All   |  |  |  |
|  |  |  | novel_mir4 | Down | CL6538.Contig1_All   |  |  |  |
|  |  |  | novel_mir4 | Down | CL12137.Contig8_All  |  |  |  |
|  |  |  | novel_mir4 | Down | CL12137.Contig9_All  |  |  |  |
|  |  |  | novel_mir4 | Down | Unigene9264_All      |  |  |  |
|  |  |  | novel_mir4 | Down | CL1489.Contig18_All  |  |  |  |
|  |  |  | novel_mir4 | Down | CL74.Contig27_All    |  |  |  |
|  |  |  | novel_mir4 | Down | CL11928.Contig7_All  |  |  |  |
|  |  |  | novel_mir4 | Down | CL11928.Contig13_All |  |  |  |
|  |  |  | novel_mir4 | Down | CL4833.Contig8_All   |  |  |  |
|  |  |  | novel_mir4 | Down | CL6294.Contig8_All   |  |  |  |
|  |  |  | novel_mir4 | Down | CL8870.Contig2_All   |  |  |  |
|  |  |  | novel_mir4 | Down | Unigene3862_All      |  |  |  |
|  |  |  | novel_mir4 | Down | CL4833.Contig7_All   |  |  |  |
|  |  |  | novel_mir4 | Down | CL5100.Contig3_All   |  |  |  |
|  |  |  | novel_mir4 | Down | CL11928.Contig5_All  |  |  |  |
|  |  |  | novel_mir4 | Down | Unigene3082_All      |  |  |  |

|  |  |  |             |      |                      |  |  |
|--|--|--|-------------|------|----------------------|--|--|
|  |  |  | novel_mir4  | Down | CL11928.Contig16_All |  |  |
|  |  |  | novel_mir4  | Down | CL3778.Contig3_All   |  |  |
|  |  |  | novel_mir4  | Down | CL581.Contig8_All    |  |  |
|  |  |  | novel_mir4  | Down | CL11928.Contig9_All  |  |  |
|  |  |  | novel_mir4  | Down | CL6964.Contig11_All  |  |  |
|  |  |  | novel_mir4  | Down | CL4113.Contig1_All   |  |  |
|  |  |  | novel_mir4  | Down | CL8870.Contig1_All   |  |  |
|  |  |  | novel_mir4  | Down | CL6964.Contig10_All  |  |  |
|  |  |  | novel_mir4  | Down | CL329.Contig22_All   |  |  |
|  |  |  | novel_mir4  | Down | CL3783.Contig4_All   |  |  |
|  |  |  | novel_mir4  | Down | Unigene4724_All      |  |  |
|  |  |  | novel_mir4  | Down | CL11928.Contig8_All  |  |  |
|  |  |  | novel_mir4  | Down | CL1005.Contig4_All   |  |  |
|  |  |  | novel_mir4  | Down | CL1489.Contig12_All  |  |  |
|  |  |  | novel_mir4  | Down | CL9327.Contig1_All   |  |  |
|  |  |  | novel_mir4  | Down | CL4833.Contig9_All   |  |  |
|  |  |  | novel_mir4  | Down | CL11928.Contig11_All |  |  |
|  |  |  | novel_mir4  | Down | CL74.Contig21_All    |  |  |
|  |  |  | novel_mir4  | Down | Unigene9005_All      |  |  |
|  |  |  | novel_mir4  | Down | Unigene12285_All     |  |  |
|  |  |  | novel_mir4  | Down | CL10598.Contig2_All  |  |  |
|  |  |  | novel_mir38 | Down | CL2104.Contig4_All   |  |  |
|  |  |  | novel_mir38 | Down | CL2104.Contig1_All   |  |  |
|  |  |  | novel_mir38 | Down | CL2104.Contig3_All   |  |  |
|  |  |  | novel_mir95 | Down | Unigene5919_All      |  |  |
|  |  |  | novel_mir95 | Down | Unigene11437_All     |  |  |
|  |  |  | novel_mir95 | Down | Unigene4241_All      |  |  |

**Table S20.** Metabolic pathways of differentially expressed miRNAs in the CK vsM10

| miRNA id     | Target id           | log2(M10/CK) | Pathway                                                                                                                                                             |
|--------------|---------------------|--------------|---------------------------------------------------------------------------------------------------------------------------------------------------------------------|
| miR396a-3p_4 | CL5140.Contig4_All  | 19.118       | Spliceosome                                                                                                                                                         |
| miR396a-3p_4 | CL2219.Contig4_All  | 19.118       | Plant-pathogen interaction                                                                                                                                          |
| miR396a-3p_4 | Unigene26657_All    | 19.118       | Plant-pathogen interaction                                                                                                                                          |
| miR396a-3p_4 | CL10745.Contig2_All | 19.118       | Glutathione metabolism                                                                                                                                              |
| novel_mir97  | Unigene11539_All    | 9.907        | Glycerophospholipid metabolism , Ether lipid metabolism , Inositol phosphate metabolism;                                                                            |
| novel_mir97  | CL11756.Contig1_All | 9.907        | Purine metabolism                                                                                                                                                   |
| novel_mir97  | CL11930.Contig3_All | 9.907        | Other types of O-glycan biosynthesis , Biosynthesis of secondary metabolites, Glycerophospholipid metabolism, Ether lipid metabolism, Inositol phosphate metabolism |
| novel_mir106 | Unigene5040_All     | 9.344        | spliceosome                                                                                                                                                         |
| novel_mir106 | Unigene3477_All     | 9.344        | Spliceosome                                                                                                                                                         |
| novel_mir106 | CL12266.Contig2_All | 9.344        | Spliceosome                                                                                                                                                         |
| novel_mir106 | Unigene6451_All     | 9.344        | Porphyrin and chlorophyll metabolism , Biosynthesis of secondary metabolites                                                                                        |
| novel_mir106 | Unigene12079_All    | 9.344        | Terpenoid backbone biosynthesis                                                                                                                                     |
| novel_mir106 | Unigene7755_All     | 9.344        | Terpenoid backbone biosynthesis                                                                                                                                     |
| novel_mir106 | CL994.Contig5_All   | 9.344        | Spliceosome                                                                                                                                                         |
| miR396a-5p   | CL2267.Contig1_All  | 6.417        | Homologous recombination                                                                                                                                            |

|              |                     |       |                                                                                                                                                                          |
|--------------|---------------------|-------|--------------------------------------------------------------------------------------------------------------------------------------------------------------------------|
| miR396a-5p   | CL10458.Contig4_All | 6.417 | Lysine degradation , Metabolic pathways , Biosynthesis of secondary metabolites                                                                                          |
| miR396a-5p   | CL623.Contig2_All   | 6.417 | Endocytosis                                                                                                                                                              |
| novel_mir120 | CL5783.Contig2_All  | 2.935 | mRNA surveillance pathway, RNA transport                                                                                                                                 |
| novel_mir47  | Unigene2403_All     | 1.972 | N-Glycan biosynthesis                                                                                                                                                    |
| novel_mir47  | CL11930.Contig5_All | 1.972 | Fatty acid elongation, Fatty acid metabolism                                                                                                                             |
| novel_mir72  | CL7956.Contig1_All  | 1.972 | Phenylpropanoid biosynthesis                                                                                                                                             |
| novel_mir72  | CL11367.Contig4_All | 1.972 | Amino sugar and nucleotide sugar metabolism                                                                                                                              |
| novel_mir72  | Unigene19898_All    | 1.972 | MAPK signaling pathway – plant, Plant-pathogen interaction                                                                                                               |
| novel_mir72  | Unigene6418_All     | 1.972 | Plant hormone signal transduction                                                                                                                                        |
| novel_mir72  | CL4372.Contig2_All  | 1.972 | Starch and sucrose metabolism                                                                                                                                            |
| novel_mir72  | Unigene7472_All     | 1.972 | Plant hormone signal transduction                                                                                                                                        |
| novel_mir72  | CL2494.Contig1_All  | 1.972 | Other glycan degradation                                                                                                                                                 |
| novel_mir72  | Unigene3832_All     | 1.972 | Plant hormone signal transduction                                                                                                                                        |
| novel_mir72  | CL2352.Contig11_All | 1.972 | ABC transporters                                                                                                                                                         |
| novel_mir72  | Unigene11537_All    | 1.972 | RNA transport, Ribosome biogenesis in eukaryotes                                                                                                                         |
| novel_mir72  | CL2144.Contig6_All  | 1.972 | Alanine, aspartate and glutamate metabolism , Valine, leucine and isoleucine degradation , Glycine, serine and threonine metabolism , Cysteine and methionine metabolism |
| novel_mir72  | Unigene10328_All    | 1.972 | Aminoacyl-tRNA biosynthesis                                                                                                                                              |
| novel_mir72  | Unigene4211_All     | 1.972 | Plant hormone signal transduction                                                                                                                                        |
| novel_mir72  | Unigene9743_All     | 1.972 | Plant hormone signal transduction                                                                                                                                        |
| novel_mir140 | Unigene10722_All    | 1.388 | Ribosome biogenesis in eukaryotes                                                                                                                                        |
| novel_mir90  | Unigene11054_All    | 1.313 | Linoleic acid metabolism, Homologous recombination                                                                                                                       |
| miR156a-5p   | CL11653.Contig7_All | 1.199 | Purine metabolism, RNA polymerase, Pyrimidine metabolism                                                                                                                 |
| miR156a-5p   | CL4553.Contig1_All  | 1.199 | Plant hormone signal transduction                                                                                                                                        |
| miR156a-5p   | CL2170.Contig2_All  | 1.199 | Protein processing in endoplasmic reticulum                                                                                                                              |

|              |                     |         |                                                                                                                                                               |
|--------------|---------------------|---------|---------------------------------------------------------------------------------------------------------------------------------------------------------------|
| miR156a-5p   | CL9049.Contig3_All  | 1.199   | Plant hormone signal transduction                                                                                                                             |
| miR156a-5p   | CL2558.Contig12_All | 1.199   | Purine metabolism, RNA polymerase, Pyrimidine metabolism                                                                                                      |
| miR156a-5p   | Unigene185_All      | 1.199   | Purine metabolism, RNA polymerase, Pyrimidine metabolism                                                                                                      |
| miR168       | Unigene13184_All    | 1.187   | Protein processing in endoplasmic reticulum, Protein export;                                                                                                  |
| miR156a      | CL9049.Contig3_All  | 1.076   | Plant hormone signal transduction                                                                                                                             |
| miR156a      | CL2170.Contig2_All  | 1.076   | Protein processing in endoplasmic reticulum                                                                                                                   |
| miR156a      | CL11653.Contig7_All | 1.076   | Purine metabolism, RNA polymerase, Pyrimidine metabolism;                                                                                                     |
| miR156a      | CL12256.Contig7_All | 1.076   | Brassinosteroid biosynthesis, Biosynthesis of secondary metabolites                                                                                           |
| miR156a      | Unigene7368_All     | 1.076   | Brassinosteroid biosynthesis, Biosynthesis of secondary metabolites                                                                                           |
| novel_mir36  | Unigene5040_All     | -10.937 | Spliceosome                                                                                                                                                   |
| novel_mir36  | CL994.Contig6_All   | -10.937 | Spliceosome;                                                                                                                                                  |
| novel_mir36  | Unigene3477_All     | -10.937 | Spliceosome                                                                                                                                                   |
| novel_mir36  | CL12266.Contig2_All | -10.937 | Spliceosome                                                                                                                                                   |
| novel_mir36  | Unigene11066_All    | -10.937 | Homologous recombination                                                                                                                                      |
| novel_mir161 | CL3265.Contig7_All  | -9.861  | Cysteine and methionine metabolism, Glutathione metabolism                                                                                                    |
| novel_mir161 | Unigene9188_All     | -9.861  | RNA degradation                                                                                                                                               |
| novel_mir161 | CL10762.Contig2_All | -9.861  | Purine metabolism, RNA polymerase, Pyrimidine metabolism                                                                                                      |
| novel_mir161 | CL5937.Contig2_All  | -9.861  | Purine metabolism, RNA polymerase, Pyrimidine metabolism, Cutin, suberine and wax biosynthesis                                                                |
| miR167d_1    | Unigene9900_All     | -6.6.35 | Pentose phosphate pathway, Biosynthesis of amino acids, Biosynthesis of secondary metabolites, Carbon fixation in photosynthetic organisms, Carbon metabolism |
| miR167d_1    | CL5786.Contig2_All  | -6.6.35 | Sphingolipid metabolism                                                                                                                                       |
| miR167d_1    | Unigene2643_All     | -6.6.35 | Pentose phosphate pathway, Biosynthesis of amino acids, Biosynthesis of secondary metabolites, Carbon fixation in photosynthetic organisms, Carbon metabolism |
| miR167d_1    | Unigene8353_All     | -6.6.35 | Pentose phosphate pathway, Biosynthesis of amino acids, Biosynthesis                                                                                          |

|              |                     |        |                                                                                                                                                                       |
|--------------|---------------------|--------|-----------------------------------------------------------------------------------------------------------------------------------------------------------------------|
|              |                     |        | of secondary metabolites, Carbon fixation in photosynthetic organisms, Carbon metabolism                                                                              |
| miR167d_1    | Unigene12094_All    | -6.635 | Pentose phosphate pathway, Biosynthesis of amino acids, Biosynthesis of secondary metabolites, Carbon fixation in photosynthetic organisms, Carbon metabolism         |
| miR167d_1    | CL1085.Contig8_All  | -6.635 | RNA transport;                                                                                                                                                        |
| miR396a-3p_1 | CL5140.Contig4_All  | -5.849 | Spliceosome                                                                                                                                                           |
| miR396a-3p_1 | CL10745.Contig5_All | -5.849 | Glutathione metabolism                                                                                                                                                |
| miR396a-3p_1 | CL2219.Contig4_All  | -5.849 | Plant-pathogen interaction;                                                                                                                                           |
| miR396a-3p_1 | Unigene26657_All    | -5.849 | Plant-pathogen interaction                                                                                                                                            |
| novel_mir22  | Unigene12250_All    | -2.346 | Endocytosis, Phagosome                                                                                                                                                |
| novel_mir22  | CL451.Contig1_All   | -2.346 | Spliceosome                                                                                                                                                           |
| novel_mir22  | Unigene11422_All    | -2.346 | Plant-pathogen interaction , Amino sugar and nucleotide sugar metabolism , Metabolic pathways , Alanine, aspartate and glutamate metabolism, Linoleic acid metabolism |
| novel_mir22  | Unigene10264_All    | -2.346 | Ribosome biogenesis in eukaryotes, Spliceosome                                                                                                                        |
| novel_mir75  | CL11927.Contig2_All | -1.599 | Basal transcription factors                                                                                                                                           |
| novel_mir75  | CL9741.Contig4_All  | -1.599 | Ubiquitin mediated proteolysis;                                                                                                                                       |
| miR397a_3    | CL11442.Contig1_All | -1.273 | Peroxisome, Citrate cycle (TCA cycle), Biosynthesis of amino acids, 2-Oxocarboxylic acid metabolism , Carbon metabolism , Glutathione metabolism;                     |
| novel_mir151 | Unigene3477_All     | -1.104 | Spliceosome                                                                                                                                                           |
| novel_mir151 | CL1290.Contig42_All | -1.104 | Terpenoid backbone biosynthesis;                                                                                                                                      |

|              |                     |        |                                                                                                                                             |
|--------------|---------------------|--------|---------------------------------------------------------------------------------------------------------------------------------------------|
| novel_mir151 | CL11286.Contig9_All | -1.104 | Glucosinolate biosynthesis , Cyanoamino acid metabolism , 2-Oxocarboxylic acid metabolism, RNA transport, Plant hormone signal transduction |
| novel_mir151 | CL6270.Contig9_All  | -1.104 | Plant hormone signal transduction;                                                                                                          |
| novel_mir151 | Unigene11539_All    | -1.104 | Glycerophospholipid metabolism , Ether lipid metabolism , Inositol phosphate metabolism;                                                    |
| novel_mir151 | CL8022.Contig1_All  | -1.104 | Pentose and glucuronate interconversions                                                                                                    |
| novel_mir151 | CL11930.Contig3_All | -1.104 | Other types of O-glycan biosynthesis, Glycerophospholipid metabolism, Ether lipid metabolism, Inositol phosphate metabolism;                |
| novel_mir151 | CL12266.Contig2_All | -1.104 | Spliceosome                                                                                                                                 |
| novel_mir151 | Unigene5040_All     | -1.104 | Spliceosome                                                                                                                                 |
| novel_mir151 | CL5804.Contig3_All  | -1.104 | Biosynthesis of secondary metabolites ,Steroid biosynthesis;                                                                                |
| novel_mir151 | Unigene7755_All     | -1.104 | Terpenoid backbone biosynthesis                                                                                                             |
| novel_mir151 | CL994.Contig6_All   | -1.104 | Spliceosome                                                                                                                                 |
| novel_mir151 | Unigene12079_All    | -1.104 | Terpenoid backbone biosynthesis                                                                                                             |

**Table S21.** Metabolic pathways of differentially expressed miRNAs in the CK vsM50

| miRNA id    | Target id           | log2(M50/CK) | Pathway                                                                                                                     |
|-------------|---------------------|--------------|-----------------------------------------------------------------------------------------------------------------------------|
| novel_mir97 | Unigene11539_All    | 9.589        | Glycerophospholipid metabolism, Ether lipid metabolism, Inositol phosphate metabolism                                       |
| novel_mir97 | CL11756.Contig1_All | 9.589        | Purine metabolism                                                                                                           |
| novel_mir97 | CL11930.Contig3_All | 9.589        | Other types of O-glycan biosynthesis, Glycerophospholipid metabolism, Ether lipid metabolism, Inositol phosphate metabolism |
| miR160      | CL11742.Contig5_All | 8.759        | Plant hormone signal transduction                                                                                           |
| miR396a-5p  | CL623.Contig3_All   | 8.550        | Endocytosis;                                                                                                                |
| miR396a-5p  | CL2267.Contig1_All  | 8.550        | Homologous recombination                                                                                                    |
| miR396a-5p  | CL10458.Contig4_All | 8.550        | Lysine degradation                                                                                                          |

|             |                     |       |                                                                    |
|-------------|---------------------|-------|--------------------------------------------------------------------|
| miR171b-3p  | CL3157.Contig1_All  | 4.210 | Plant hormone signal transduction                                  |
| miR171b-3p  | CL3157.Contig4_All  | 4.210 | Plant hormone signal transduction                                  |
| miR171b-3p  | CL1203.Contig7_All  | 4.210 | MAPK signaling pathway – plant, Plant hormone signal transduction  |
| miR399b     | Unigene8906_All     | 4.087 | Ribosome                                                           |
| miR399b     | CL2276.Contig1_All  | 4.087 | Ubiquitin mediated proteolysis                                     |
| miR399b     | CL3187.Contig4_All  | 4.087 | Alanine, aspartate and glutamate metabolism, Butanoate metabolism; |
| miR399b     | CL11662.Contig2_All | 4.087 | Protein processing in endoplasmic reticulum                        |
| miR399a_6   | CL2276.Contig2_All  | 2.709 | Ubiquitin mediated proteolysis                                     |
| miR399a_6   | CL11662.Contig2_All | 2.709 | Protein processing in endoplasmic reticulum                        |
| miR168b_1   | Unigene35241_All    | 1.949 | Metabolic pathways, Ascorbate and aldarate metabolism;             |
| miR168b_1   | Unigene13184_All    | 1.949 | Protein processing in endoplasmic reticulum, Protein export        |
| miR168b_1   | Unigene3288_All     | 1.949 | Metabolic pathways, Ascorbate and aldarate metabolism              |
| miR168b_1   | Unigene3262_All     | 1.949 | Metabolic pathways, Ascorbate and aldarate metabolism              |
| miR168b_1   | CL10842.Contig4_All | 1.949 | Metabolic pathways, Ascorbate and aldarate metabolism              |
| miR168b_1   | Unigene3326_All     | 1.949 | Metabolic pathways, Ascorbate and aldarate metabolism              |
| miR168b_1   | Unigene12302_All    | 1.949 | Metabolic pathways, Ascorbate and aldarate metabolism              |
| novel_mir72 | CL2494.Contig5_All  | 1.599 | Other glycan degradation                                           |
| novel_mir72 | CL7956.Contig1_All  | 1.599 | Phenylpropanoid biosynthesis                                       |
| novel_mir72 | Unigene19898_All    | 1.599 | MAPK signaling pathway – plant, Plant-pathogen interaction         |
| novel_mir72 | Unigene6418_All     | 1.599 | Plant hormone signal transduction                                  |
| novel_mir72 | CL4372.Contig2_All  | 1.599 | Starch and sucrose metabolism                                      |
| novel_mir72 | Unigene7472_All     | 1.599 | Plant hormone signal transduction                                  |
| novel_mir72 | Unigene3832_All     | 1.599 | Plant hormone signal transduction                                  |
| novel_mir72 | CL2352.Contig11_All | 1.599 | ABC transporters                                                   |
| novel_mir72 | Unigene11537_All    | 1.599 | RNA transport, Ribosome biogenesis in eukaryotes                   |

|              |                     |       |                                                                                                                                                                       |
|--------------|---------------------|-------|-----------------------------------------------------------------------------------------------------------------------------------------------------------------------|
| novel_mir72  | CL2144.Contig6_All  | 1.599 | Alanine, aspartate and glutamate metabolism, Valine, leucine and isoleucine degradation, Glycine, serine and threonine metabolism, Cysteine and methionine metabolism |
| novel_mir72  | Unigene10328_All    | 1.599 | Aminoacyl-tRNA biosynthesis                                                                                                                                           |
| novel_mir72  | CL11367.Contig6_All | 1.599 | Amino sugar and nucleotide sugar metabolism                                                                                                                           |
| novel_mir72  | Unigene4211_All     | 1.599 | Plant hormone signal transduction                                                                                                                                     |
| novel_mir72  | Unigene9743_All     | 1.599 | Plant hormone signal transduction                                                                                                                                     |
| novel_mir140 | Unigene10722_All    | 1.462 | Ribosome biogenesis in eukaryotes                                                                                                                                     |
| miR396a-3p_5 | Unigene15223_All    | 1.367 | RNA transport                                                                                                                                                         |
| miR396a-3p_5 | Unigene1142_All     | 1.367 | Base excision repair                                                                                                                                                  |
| miR396a-3p_5 | CL3506.Contig5_All  | 1.367 | MAPK signaling pathway – plant, Plant-pathogen interaction                                                                                                            |
| miR396a-3p_5 | Unigene26657_All    | 1.367 | Plant-pathogen interaction                                                                                                                                            |
| miR396a-3p_5 | Unigene32495_All    | 1.367 | Base excision repair                                                                                                                                                  |
| miR396a-3p_5 | CL9790.Contig1_All  | 1.367 | RNA transport                                                                                                                                                         |
| miR396a-3p_5 | CL3025.Contig1_All  | 1.367 | Purine metabolism, RNA polymerase, Pyrimidine metabolism                                                                                                              |
| miR396a-3p_5 | CL10745.Contig5_All | 1.367 | Glutathione metabolism                                                                                                                                                |
| miR396a-3p_5 | CL2219.Contig7_All  | 1.367 | Plant-pathogen interaction                                                                                                                                            |
| miR396a-3p_5 | CL5140.Contig7_All  | 1.367 | Spliceosome                                                                                                                                                           |

|              |                     |       |                                                                                                                                                                                                                                                                                     |
|--------------|---------------------|-------|-------------------------------------------------------------------------------------------------------------------------------------------------------------------------------------------------------------------------------------------------------------------------------------|
| 3p_5         |                     |       |                                                                                                                                                                                                                                                                                     |
| novel_mir176 | Unigene5058_All     | 1.277 | RNA degradation                                                                                                                                                                                                                                                                     |
| novel_mir176 | CL5246.Contig1_All  | 1.277 | Basal transcription factors                                                                                                                                                                                                                                                         |
| novel_mir176 | CL1212.Contig4_All  | 1.277 | Alanine, aspartate and glutamate metabolism, Arginine biosynthesis, Biosynthesis of amino acids, Carbon fixation in photosynthetic organisms, 2-Oxocarboxylic acid metabolism, Glycine, serine and threonine metabolism, Carbon metabolism, Glyoxylate and dicarboxylate metabolism |
| novel_mir176 | Unigene5756_All     | 1.277 | Pentose and glucuronate interconversions;                                                                                                                                                                                                                                           |
| novel_mir176 | Unigene2465_All     | 1.277 | DNA replication                                                                                                                                                                                                                                                                     |
| novel_mir176 | CL10704.Contig2_All | 1.277 | Phosphatidylinositol signaling system, Glycerophospholipid metabolism, Glycerolipid metabolism                                                                                                                                                                                      |
| novel_mir176 | Unigene10699_All    | 1.277 | Spliceosome                                                                                                                                                                                                                                                                         |
| novel_mir176 | Unigene3222_All     | 1.277 | Spliceosome                                                                                                                                                                                                                                                                         |
| novel_mir176 | Unigene6459_All     | 1.277 | Spliceosome                                                                                                                                                                                                                                                                         |
| novel_mir176 | CL746.Contig32_All  | 1.277 | Ubiquitin mediated proteolysis                                                                                                                                                                                                                                                      |
| novel_mir176 | CL3878.Contig4_All  | 1.277 | Pentose and glucuronate interconversions                                                                                                                                                                                                                                            |
| novel_mir176 | Unigene10704_All    | 1.277 | Anthocyanin biosynthesis Isoflavonoid biosynthesis , Flavone and flavonol biosynthesis, Arginine and proline metabolism                                                                                                                                                             |
| novel_mir176 | Unigene10799_All    | 1.277 | Spliceosome                                                                                                                                                                                                                                                                         |
| novel_mir176 | CL10443.Contig3_All | 1.277 | RNA degradation                                                                                                                                                                                                                                                                     |
| novel_mir176 | Unigene5877_All     | 1.277 | Plant-pathogen interaction                                                                                                                                                                                                                                                          |
| novel_mir176 | Unigene4275_All     | 1.277 | Anthocyanin biosynthesis, Isoflavonoid biosynthesis, Flavone and flavonol biosynthesis, Arginine and proline metabolism                                                                                                                                                             |
| novel_mir176 | Unigene30367_All    | 1.277 | Plant-pathogen interaction                                                                                                                                                                                                                                                          |
| novel_mir176 | CL12106.Contig7_All | 1.277 | Spliceosome                                                                                                                                                                                                                                                                         |
| novel_mir176 | CL11400.Contig1_All | 1.277 | Purine metabolism                                                                                                                                                                                                                                                                   |

|              |                     |       |                                                                                                                         |
|--------------|---------------------|-------|-------------------------------------------------------------------------------------------------------------------------|
| novel_mir176 | CL463.Contig6_All   | 1.277 | DNA replication                                                                                                         |
| novel_mir176 | Unigene9281_All     | 1.277 | Anthocyanin biosynthesis, Isoflavonoid biosynthesis, Flavone and flavonol biosynthesis, Arginine and proline metabolism |
| novel_mir176 | Unigene3776_All     | 1.277 | Plant-pathogen interaction                                                                                              |
| novel_mir176 | CL11400.Contig7_All | 1.277 | Purine metabolism                                                                                                       |
| novel_mir61  | Unigene4832_All     | 1.207 | RNA transport                                                                                                           |
| novel_mir61  | CL11652.Contig1_All | 1.207 | Biosynthesis of secondary metabolites, Phenylpropanoid biosynthesis                                                     |
| novel_mir61  | CL6502.Contig1_All  | 1.207 | mRNA surveillance pathway , RNA transport                                                                               |
| miR396a-3p_1 | CL10745.Contig5_All | 1.131 | Glutathione metabolism                                                                                                  |
| miR396a-3p_1 | Unigene26657_All    | 1.131 | Plant-pathogen interaction                                                                                              |
| miR396a-3p_1 | CL2219.Contig9_All  | 1.131 | Plant-pathogen interaction                                                                                              |
| novel_mir73  | CL823.Contig4_All   | 1.130 | Biosynthesis of amino acids, Phenylalanine, tyrosine and tryptophan biosynthesis                                        |
| novel_mir11  | CL11597.Contig3_All | 1.090 | Anthocyanin biosynthesis, Isoflavonoid biosynthesis, Flavone and flavonol biosynthesis, Arginine and proline metabolism |
| novel_mir125 | CL1025.Contig6_All  | 1.078 | Glycosylphosphatidylinositol (GPI)-anchor biosynthesis                                                                  |
| novel_mir179 | Unigene9281_All     | 1.047 | Anthocyanin biosynthesis, Isoflavonoid biosynthesis, Flavone and flavonol biosynthesis, Arginine and proline metabolism |
| novel_mir179 | Unigene7634_All     | 1.047 | Pantothenate and CoA biosynthesis, Biosynthesis of secondary metabolites                                                |
| novel_mir179 | Unigene6459_All     | 1.047 | Spliceosome                                                                                                             |
| novel_mir179 | Unigene5756_All     | 1.047 | Pentose and glucuronate interconversions                                                                                |
| novel_mir179 | Unigene5058_All     | 1.047 | RNA degradation                                                                                                         |

|              |                      |         |                                                                                                                                                                                    |
|--------------|----------------------|---------|------------------------------------------------------------------------------------------------------------------------------------------------------------------------------------|
| novel_mir179 | Unigene4275_All      | 1.047   | Anthocyanin biosynthesis, Isoflavonoid biosynthesis, Flavone and flavonol biosynthesis, Arginine and proline metabolism                                                            |
| novel_mir179 | Unigene3222_All      | 1.047   | Spliceosome                                                                                                                                                                        |
| novel_mir179 | Unigene2465_All      | 1.047   | DNA replication                                                                                                                                                                    |
| novel_mir179 | Unigene12111_All     | 1.047   | Glycolysis / Gluconeogenesis, Amino sugar and nucleotide sugar metabolism, Galactose metabolism, Fructose and mannose metabolism, Starch and sucrose metabolism, Carbon metabolism |
| novel_mir179 | Unigene11802_All     | 1.047   | Pentose and glucuronate interconversions                                                                                                                                           |
| novel_mir179 | Unigene10799_All     | 1.047   | Spliceosome                                                                                                                                                                        |
| novel_mir179 | Unigene10699_All     | 1.047   | Spliceosome                                                                                                                                                                        |
| novel_mir179 | CL8668.Contig14_All  | 1.047   | Ribosome biogenesis in eukaryotes, Protein processing in endoplasmic reticulum                                                                                                     |
| novel_mir179 | CL463.Contig6_All    | 1.047   | DNA replication                                                                                                                                                                    |
| novel_mir179 | CL4206.Contig8_All   | 1.047   | Phenylpropanoid biosynthesis                                                                                                                                                       |
| novel_mir179 | CL3878.Contig4_All   | 1.047   | Pentose and glucuronate interconversions                                                                                                                                           |
| novel_mir179 | CL368.Contig8_All    | 1.047   | Phagosome, Oxidative phosphorylation                                                                                                                                               |
| novel_mir179 | CL2997.Contig1_All   | 1.047   | Glycolysis / Gluconeogenesis, Amino sugar and nucleotide sugar metabolism, Galactose metabolism, Fructose and mannose metabolism, Starch and sucrose metabol, Carbon metabolism    |
| novel_mir179 | CL12315.Contig15_All | 1.047   | Glycolysis / Gluconeogenesis                                                                                                                                                       |
| novel_mir179 | CL1222.Contig4_All   | 1.047   | Pantothenate and CoA biosynthesis                                                                                                                                                  |
| novel_mir179 | CL11400.Contig1_All  | 1.047   | Purine metabolism                                                                                                                                                                  |
| novel_mir179 | CL10467.Contig17_All | 1.047   | Amino sugar and nucleotide sugar metabolism, Metabolic pathways                                                                                                                    |
| miR160a-5p   | CL8053.Contig1_All   | -15.583 | Plant hormone signal transduction                                                                                                                                                  |
| miR160a-5p   | CL7275.Contig1_All   | -15.583 | Plant hormone signal transduction                                                                                                                                                  |

|              |                     |         |                                                                                                                                                      |
|--------------|---------------------|---------|------------------------------------------------------------------------------------------------------------------------------------------------------|
| novel_mir75  | CL11927.Contig2_All | -12.060 | Basal transcription factor                                                                                                                           |
| novel_mir75  | CL9741.Contig4_All  | -12.060 | Ubiquitin mediated proteolysis                                                                                                                       |
| miR171b-3p-3 | CL3157.Contig1_All  | -10.891 | Plant hormone signal transduction                                                                                                                    |
| miR171b-3p_3 | CL3157.Contig4_All  | -10.891 | Plant hormone signal transduction                                                                                                                    |
| novel_mir160 | Unigene7853_All     | -10.689 | Spliceosome                                                                                                                                          |
| novel_mir79  | Unigene19726_All    | -10.264 | Starch and sucrose metabolism, Cyanoamino acid metabolism, Phenylpropanoid biosynthesis                                                              |
| novel_mir79  | CL1682.Contig15_All | -10.264 | Starch and sucrose metabolism, Cyanoamino acid metabolism, Phenylpropanoid biosynthesis                                                              |
| novel_mir79  | CL12266.Contig2_All | -10.264 | Spliceosome                                                                                                                                          |
| novel_mir79  | CL1290.Contig42_All | -10.264 | Terpenoid backbone biosynthesis                                                                                                                      |
| novel_mir79  | Unigene12079_All    | -10.264 | Terpenoid backbone biosynthesis                                                                                                                      |
| novel_mir79  | Unigene7755_All     | -10.264 | Terpenoid backbone biosynthesis                                                                                                                      |
| novel_mir79  | CL994.Contig6_All   | -10.264 | Spliceosome                                                                                                                                          |
| novel_mir79  | CL8022.Contig1_All  | -10.264 | Pentose and glucuronate interconversions                                                                                                             |
| novel_mir161 | CL3265.Contig7_All  | -9.861  | Cysteine and methionine metabolism, Glutathione metabolism                                                                                           |
| novel_mir161 | Unigene9188_All     | -9.861  | RNA degradation                                                                                                                                      |
| novel_mir161 | CL10762.Contig2_All | -9.861  | Purine metabolism, RNA polymerase, Pyrimidine metabolism                                                                                             |
| novel_mir161 | CL5937.Contig2_All  | -9.861  | Purine metabolism, RNA polymerase, Pyrimidine metabolism                                                                                             |
| novel_mir47  | Unigene2403_All     | -9.589  | N-Glycan biosynthesis Metabolic pathways                                                                                                             |
| novel_mir47  | CL11930.Contig5_All | -9.589  | Metabolic pathways, Fatty acid elongation, Fatty acid metabolism                                                                                     |
| miR167d_1    | Unigene9900_All     | -7.379  | Pentose phosphate pathway, Biosynthesis of amino acids, Carbon fixation in photosynthetic organisms, Carbon metabolism, Phenylpropanoid biosynthesis |

|              |                      |        |                                                                                                                                                      |
|--------------|----------------------|--------|------------------------------------------------------------------------------------------------------------------------------------------------------|
| miR167d_1    | Unigene8353_All      | -7.379 | Pentose phosphate pathway, Biosynthesis of amino acids, Carbon fixation in photosynthetic organisms , Carbon metabolism                              |
| miR167d_1    | Unigene2643_All      | -7.379 | Pentose phosphate pathway, Biosynthesis of amino acids, Carbon fixation in photosynthetic organisms, Carbon metabolism                               |
| miR167d_1    | Unigene12094_All     | -7.379 | Pentose phosphate pathway, Biosynthesis of amino acids, Carbon fixation in photosynthetic organisms, Carbon metabolism                               |
| miR167d_1    | CL5786.Contig3_All   | -7.379 | Sphingolipid metabolism                                                                                                                              |
| miR167d_1    | CL1085.Contig8_All   | -7.379 | RNA transport                                                                                                                                        |
| miR396b      | CL623.Contig3_All    | -4.162 | Endocytosis                                                                                                                                          |
| miR396b      | CL5298.Contig2_All   | -4.162 | Other types of O-glycan biosynthesis                                                                                                                 |
| miR396b      | CL3856.Contig4_All   | -4.162 | AGE-RAGE signaling pathway in diabetic complications                                                                                                 |
| miR396b      | CL2267.Contig1_All   | -4.162 | Homologous recombination                                                                                                                             |
| miR396b      | CL1599.Contig7_All   | -4.162 | RNA transport                                                                                                                                        |
| miR396b      | CL10458.Contig4_All  | -4.162 | Lysine degradation                                                                                                                                   |
| novel_mir56  | CL5937.Contig55_All  | -3.174 | Cutin, suberine and wax biosynthesis                                                                                                                 |
| novel_mir56  | CL2960.Contig3_All   | -3.174 | Circadian rhythm - plant                                                                                                                             |
| novel_mir138 | CL1673.Contig4_All   | -3.081 | Linoleic acid metabolism, alpha-Linolenic acid metabolism                                                                                            |
| novel_mir13  | Unigene4506_All      | -2.987 | Plant-pathogen interaction, Amino sugar and nucleotide sugar metabolism                                                                              |
| novel_mir13  | CL11652.Contig31_All | -2.987 | Sesquiterpenoid and triterpenoid biosynthesis, Plant-pathogen interaction                                                                            |
| novel_mir13  | Unigene6986_All      | -2.987 | Sesquiterpenoid and triterpenoid biosynthesis, Plant-pathogen interaction, Amino sugar and nucleotide sugar metabolism                               |
| novel_mir13  | Unigene4130_All      | -2.987 | Plant-pathogen interaction, Amino sugar and nucleotide sugar metabolism, Alanine, aspartate and glutamate metabolism, MAPK signaling pathway - plant |

|              |                     |        |                                                                                                                         |
|--------------|---------------------|--------|-------------------------------------------------------------------------------------------------------------------------|
| novel_mir13  | Unigene11664_All    | -2.987 | Sesquiterpenoid and triterpenoid biosynthesis, Plant-pathogen interaction , Amino sugar and nucleotide sugar metabolism |
| miR396h      | CL623.Contig3_All   | -2.198 | Endocytosis                                                                                                             |
| miR396h      | CL5884.Contig4_All  | -2.198 | RNA transport                                                                                                           |
| miR396h      | CL5298.Contig2_All  | -2.198 | Other types of O-glycan biosynthesis                                                                                    |
| miR396h      | CL2267.Contig1_All  | -2.198 | Homologous recombination                                                                                                |
| miR396h      | CL10458.Contig4_All | -2.198 | Lysine degradation, Lysine biosynthesis, Biosynthesis of amino acids,                                                   |
| novel_mir76  | CL9741.Contig4_All  | -2.129 | Ubiquitin mediated proteolysis                                                                                          |
| novel_mir82  | Unigene3546_All     | -2.122 | Cysteine and methionine metabolism, Diterpenoid biosynthesis                                                            |
| novel_mir45  | Unigene12033_All    | -1.657 | RNA polymerase, Pyrimidine metabolism, Pentose and glucuronate interconversions                                         |
| novel_mir148 | Unigene5871_All     | -1.555 | Ribosome                                                                                                                |
| novel_mir148 | Unigene8713_All     | -1.555 | Ribosome                                                                                                                |
| miR171d_1    | CL9585.Contig3_All  | -1.451 | Circadian rhythm – plant, Ubiquitin mediated proteolysis                                                                |
| miR171d_1    | CL3157.Contig1_All  | -1.451 | Plant hormone signal transduction                                                                                       |
| miR171d_1    | CL3157.Contig4_All  | -1.451 | Plant hormone signal transduction                                                                                       |
| novel_mir42  | CL2960.Contig3_All  | -1.324 | Circadian rhythm - plant                                                                                                |
| miR398b      | CL4864.Contig1_All  | -1.304 | Purine metabolism, RNA polymerase, Pyrimidine metabolism                                                                |
| miR171f_3    | CL3157.Contig1_All  | -1.266 | Plant hormone signal transduction                                                                                       |
| miR171f_3    | CL3157.Contig4_All  | -1.266 | Plant hormone signal transduction                                                                                       |
| novel_mir63  | Unigene9662_All     | -1.178 | Porphyrin and chlorophyll metabolism, Aminoacyl-tRNA biosynthesis,                                                      |
| novel_mir63  | Unigene27384_All    | -1.178 | Ribosome                                                                                                                |
| novel_mir63  | Unigene27383_All    | -1.178 | Ribosome                                                                                                                |
| novel_mir63  | CL9365.Contig2_All  | -1.178 | Glycolysis / Gluconeogenesis, Pentose phosphate pathway, Biosynthesis of amino acids, Fructose and mannose              |

|              |                     |        |                                                                               |
|--------------|---------------------|--------|-------------------------------------------------------------------------------|
|              |                     |        | metabolism, Carbon fixation in photosynthetic organisms,<br>Carbon metabolism |
| novel_mir63  | CL2369.Contig5_All  | -1.178 | Spliceosome                                                                   |
| novel_mir63  | CL2211.Contig3_All  | -1.178 | Endocytosis, Glycerophospholipid metabolism, Ether lipid<br>metabolism        |
| novel_mir175 | CL3501.Contig3_All  | -1.161 | Spliceosome                                                                   |
| novel_mir29  | CL12229.Contig3_All | -1.150 | Ribosome                                                                      |
| novel_mir29  | Unigene8173_All     | -1.150 | Ribosome                                                                      |
| novel_mir29  | CL968.Contig2_All   | -1.150 | Ribosome                                                                      |
| novel_mir29  | Unigene8536_All     | -1.150 | Ribosome                                                                      |
| novel_mir4   | CL74.Contig15_All   | -1.088 | Plant hormone signal transduction                                             |
| novel_mir4   | Unigene3862_All     | -1.088 | mRNA surveillance pathway                                                     |
| novel_mir4   | Unigene36625_All    | -1.088 | mRNA surveillance pathway                                                     |
| novel_mir4   | CL9183.Contig4_All  | -1.088 | Circadian rhythm - plant                                                      |
| novel_mir4   | CL8870.Contig1_All  | -1.088 | Oxidative phosphorylation                                                     |
| novel_mir4   | CL74.Contig27_All   | -1.088 | Plant hormone signal transduction                                             |
| novel_mir4   | CL5100.Contig3_All  | -1.088 | mRNA surveillance pathway                                                     |
| novel_mir4   | CL4833.Contig8_All  | -1.088 | mRNA surveillance pathway                                                     |
| novel_mir4   | CL329.Contig22_All  | -1.088 | Phagosome, Oxidative phosphorylation;                                         |
| novel_mir4   | CL12137.Contig9_All | -1.088 | Ribosome                                                                      |

**Table S22.** Metabolic pathways of differentially expressed miRNAs in the CK vsM100

| miRNA id         | Target id          | log2(M100/CK) | Pathway                    |
|------------------|--------------------|---------------|----------------------------|
| miR396a-<br>3p_4 | CL5140.Contig8_All | 10.884        | Spliceosome                |
| miR396a-<br>3p_4 | CL2219.Contig7_All | 10.884        | Plant-pathogen interaction |
| miR396a-         | Unigene26657_All   | 10.884        | Plant-pathogen interaction |

|              |                     |        |                                                                                                                             |
|--------------|---------------------|--------|-----------------------------------------------------------------------------------------------------------------------------|
| 3p_4         |                     |        |                                                                                                                             |
| miR396a-3p_4 | CL10745.Contig7_All | 10.884 | Glutathione metabolism                                                                                                      |
| novel_mir97  | Unigene11539_All    | 10.644 | Glycerophospholipid metabolism, Ether lipid metabolism, Inositol phosphate metabolism                                       |
| novel_mir97  | CL11756.Contig1_All | 10.644 | Purine metabolism                                                                                                           |
| novel_mir97  | CL11930.Contig3_All | 10.644 | Other types of O-glycan biosynthesis, Glycerophospholipid metabolism, Ether lipid metabolism, Inositol phosphate metabolism |
| miR160       | CL11742.Contig5_All | 7.629  | Plant hormone signal transduction                                                                                           |
| miR171b-3p   | CL1203.Contig7_All  | 3.766  | MAPK signaling pathway – plant, Plant hormone signal transduction                                                           |
| miR171b-3p   | CL3157.Contig1_All  | 3.766  | Plant hormone signal transduction                                                                                           |
| miR171b-3p   | CL3157.Contig4_All  | 3.766  | Plant hormone signal transduction                                                                                           |
| miR399b      | CL2276.Contig2_All  | 3.597  | Ubiquitin mediated proteolysis                                                                                              |
| miR399b      | Unigene8906_All     | 3.597  | Ribosome                                                                                                                    |
| miR399b      | CL11662.Contig2_All | 3.597  | Protein processing in endoplasmic reticulum                                                                                 |
| miR399b      | CL3187.Contig8_All  | 3.597  | Alanine, aspartate and glutamate metabolism, Butanoate metabolism                                                           |
| miR399a_6    | CL2276.Contig2_All  | 2.479  | Ubiquitin mediated proteolysis                                                                                              |
| miR399a_6    | CL11662.Contig2_All | 2.479  | Protein processing in endoplasmic reticulum                                                                                 |
| novel_mir47  | Unigene2403_All     | 2.295  | N-Glycan biosynthesis, Metabolic pathways                                                                                   |
| novel_mir47  | CL11930.Contig5_All | 2.295  | Metabolic pathways, Fatty acid elongation, Fatty acid metabolism                                                            |
| novel_mir72  | Unigene9743_All     | 1.999  | Plant hormone signal transduction                                                                                           |
| novel_mir72  | Unigene7472_All     | 1.999  | Plant hormone signal transduction                                                                                           |
| novel_mir72  | Unigene6418_All     | 1.999  | Plant hormone signal transduction                                                                                           |
| novel_mir72  | Unigene4211_All     | 1.999  | Plant hormone signal transduction                                                                                           |

|             |                      |       |                                                                                                                                                                        |
|-------------|----------------------|-------|------------------------------------------------------------------------------------------------------------------------------------------------------------------------|
| novel_mir72 | Unigene3832_All      | 1.999 | Plant hormone signal transduction                                                                                                                                      |
| novel_mir72 | Unigene19898_All     | 1.999 | MAPK signaling pathway - plant, Plant-pathogen interaction                                                                                                             |
| novel_mir72 | Unigene11537_All     | 1.999 | RNA transport, Ribosome biogenesis in eukaryotes                                                                                                                       |
| novel_mir72 | Unigene10328_All     | 1.999 | Aminoacyl-tRNA biosynthesis                                                                                                                                            |
| novel_mir72 | CL7956.Contig1_All   | 1.999 | Phenylpropanoid biosynthesis                                                                                                                                           |
| novel_mir72 | CL4372.Contig2_All   | 1.999 | Starch and sucrose metabolism                                                                                                                                          |
| novel_mir72 | CL2494.Contig1_All   | 1.999 | Other glycan degradation                                                                                                                                               |
| novel_mir72 | CL2352.Contig11_All  | 1.999 | ABC transporters                                                                                                                                                       |
| novel_mir72 | CL2144.Contig5_All   | 1.999 | Alanine, aspartate and glutamate metabolism, Valine, leucine and isoleucine degradation, Glycine, serine and threonine metabolism, Cysteine and methionine metabolism; |
| novel_mir72 | CL11367.Contig4_All  | 1.999 | Amino sugar and nucleotide sugar metabolism                                                                                                                            |
| miR171 f_3  | CL3157.Contig1_All   | 1.368 | Plant hormone signal transduction                                                                                                                                      |
| miR171f_3   | CL3157.Contig4_All   | 1.368 | Plant hormone signal transduction                                                                                                                                      |
| novel_mir11 | CL11597.Contig3_All  | 1.334 | Anthocyanin biosynthesis, Isoflavonoid biosynthesis, Flavone and flavonol biosynthesis, Arginine and proline metabolism                                                |
| novel_mir62 | Unigene8140_All      | 1.248 | Aminoacyl-tRNA biosynthesis                                                                                                                                            |
| novel_mir62 | CL11634.Contig12_All | 1.248 | Alanine, aspartate and glutamate metabolism, Arginine biosynthesis, Biosynthesis of amino acids                                                                        |
| novel_mir62 | CL11827.Contig3_All  | 1.248 | Alanine, aspartate and glutamate metabolism, Pyrimidine metabolism                                                                                                     |
| novel_mir62 | Unigene26594_All     | 1.248 | beta-Alanine metabolism, Alanine, aspartate and glutamate metabolism, Taurine and hypotaurine metabolism, Butanoate metabolism                                         |
| novel_mir62 | CL4469.Contig2_All   | 1.248 | Porphyrin and chlorophyll metabolism Biosynthesis of secondary metabolites                                                                                             |
| novel_mir62 | CL651.Contig3_All    | 1.248 | Vancomycin resistance, Metabolic pathways                                                                                                                              |

|              |                     |       |                                                                           |
|--------------|---------------------|-------|---------------------------------------------------------------------------|
| novel_mir62  | Unigene7005_All     | 1.248 | Aminoacyl-tRNA biosynthesis                                               |
| miR396a-3p_5 | Unigene32495_All    | 1.106 | Base excision repair                                                      |
| miR396a-3p_5 | Unigene26657_All    | 1.106 | Plant-pathogen interaction                                                |
| miR396a-3p_5 | Unigene15223_All    | 1.106 | RNA transport                                                             |
| miR396a-3p_5 | Unigene1142_All     | 1.106 | Base excision repair                                                      |
| miR396a-3p_5 | CL9790.Contig2_All  | 1.106 | RNA transport                                                             |
| miR396a-3p_5 | CL5140.Contig7_All  | 1.106 | Spliceosome                                                               |
| miR396a-3p_5 | CL3506.Contig5_All  | 1.106 | MAPK signaling pathway - plant, Plant-pathogen interaction;               |
| miR396a-3p_5 | CL3025.Contig13_All | 1.106 | Purine metabolism, RNA polymerase, Pyrimidine metabolism                  |
| miR396a-3p_5 | CL2219.Contig7_All  | 1.106 | Plant-pathogen interaction                                                |
| miR396a-3p_5 | CL10745.Contig2_All | 1.106 | Glutathione metabolism                                                    |
| novel_mir101 | Unigene7152_All     | 1.071 | Pentose and glucuronate interconversions, Fructose and mannose metabolism |
| novel_mir101 | CL11827.Contig8_All | 1.071 | Alanine, aspartate and glutamate metabolism, Pyrimidine metabolism        |
| novel_mir101 | CL8130.Contig17_All | 1.071 | Lysine degradation                                                        |
| novel_mir101 | Unigene10661_All    | 1.071 | Pentose and glucuronate interconversions, Fructose and mannose            |

|               |                     |         |                                                                                                                        |
|---------------|---------------------|---------|------------------------------------------------------------------------------------------------------------------------|
|               |                     |         | metabolism                                                                                                             |
| miR160a-5p    | CL8053.Contig1_All  | -15.583 | Plant hormone signal transduction                                                                                      |
| miR160a-5p    | CL11742.Contig2_All | -15.583 | Plant hormone signal transduction                                                                                      |
| miR160a-5p    | CL7275.Contig2_All  | -15.583 | Plant hormone signal transduction                                                                                      |
| miR167d_1     | Unigene9900_All     | -12.086 | Pentose phosphate pathway, Biosynthesis of amino acids, Carbon fixation in photosynthetic organisms, Carbon metabolism |
| miR167d_1     | Unigene8353_All     | -12.086 | Pentose phosphate pathway, Biosynthesis of amino acids, Carbon fixation in photosynthetic organisms, Carbon metabolism |
| miR167d_1     | Unigene2643_All     | -12.086 | Pentose phosphate pathway, Biosynthesis of amino acids, Carbon fixation in photosynthetic organisms, Carbon metabolism |
| miR167d_1     | Unigene12094_All    | -12.086 | Pentose phosphate pathway, Biosynthesis of amino acids, Carbon fixation in photosynthetic organisms, Carbon metabolism |
| miR167d_1     | CL5786.Contig2_All  | -12.086 | Sphingolipid metabolism, Metabolic pathway                                                                             |
| miR167d_1     | CL1085.Contig8_All  | -12.086 | RNA transport;                                                                                                         |
| miR171 b-3p_3 | CL3157.Contig1_All  | -5.248  | Plant hormone signal transduction                                                                                      |
| miR171b-3p_3  | CL3157.Contig4_All  | -5.248  | Plant hormone signal transduction                                                                                      |
| miR6300       | Unigene36691_All    | -2.857  | Homologous recombination                                                                                               |
| miR6300       | Unigene14900_All    | -2.857  | Phenylpropanoid biosynthesis                                                                                           |
| miR6300       | CL6146.Contig4_All  | -2.857  | Spliceosome                                                                                                            |
| miR6300       | CL3661.Contig14_All | -2.857  | Ubiquitin mediated proteolysis                                                                                         |
| miR6300       | CL3368.Contig6_All  | -2.857  | Fatty acid biosynthesis, Fatty acid metabolism, Biosynthesis of unsaturated fatty acids;                               |
| miR6300       | CL2760.Contig1_All  | -2.857  | Homologous recombination                                                                                               |
| miR6300       | CL2696.Contig10_All | -2.857  | Alanine, aspartate and glutamate metabolism, Nitrogen metabolism, Arginine biosynthesis                                |

|              |                     |        |                                                                                                                                                |
|--------------|---------------------|--------|------------------------------------------------------------------------------------------------------------------------------------------------|
| miR6300      | CL11946.Contig2_All | -2.857 | Endocytosis                                                                                                                                    |
| miR6300      | CL11863.Contig1_All | -2.857 | Carbon fixation in photosynthetic organisms, Pyruvate metabolism, Carbon metabolism                                                            |
| novel_mir22  | Unigene12250_All    | -2.492 | Endocytosis, Phagosome                                                                                                                         |
| novel_mir22  | CL451.Contig1_All   | -2.492 | Spliceosome                                                                                                                                    |
| novel_mir22  | Unigene11422_All    | -2.492 | Plant-pathogen interaction, Alanine, aspartate and glutamate metabolism, Amino sugar and nucleotide sugar metabolism, Linoleic acid metabolism |
| novel_mir22  | Unigene10264_All    | -2.492 | Ribosome biogenesis in eukaryotes, Spliceosome                                                                                                 |
| novel_mir148 | Unigene5871_All     | -1.549 | Ribosome                                                                                                                                       |
| novel_mir148 | Unigene8713_All     | -1.549 | Ribosome                                                                                                                                       |
| novel_mir151 | Unigene3477_All     | -1.363 | Spliceosome                                                                                                                                    |
| novel_mir151 | CL1290.Contig42_All | -1.363 | Terpenoid backbone biosynthesis                                                                                                                |
| novel_mir151 | Unigene7755_All     | -1.363 | Terpenoid backbone biosynthesis                                                                                                                |
| novel_mir151 | Unigene5040_All     | -1.363 | Spliceosome                                                                                                                                    |
| novel_mir151 | Unigene12079_All    | -1.363 | Terpenoid backbone biosynthesis                                                                                                                |
| novel_mir151 | Unigene11539_All    | -1.363 | Glycerophospholipid metabolism, Ether lipid metabolism, Inositol phosphate metabolism                                                          |
| novel_mir151 | CL994.Contig5_All   | -1.363 | Spliceosome                                                                                                                                    |
| novel_mir151 | CL8022.Contig1_All  | -1.363 | Pentose and glucuronate interconversions, Metabolic pathways                                                                                   |
| novel_mir151 | CL6270.Contig9_All  | -1.363 | Plant hormone signal transduction                                                                                                              |
| novel_mir151 | CL5804.Contig3_All  | -1.363 | Steroid biosynthesis;                                                                                                                          |
| novel_mir151 | CL2947.Contig1_All  | -1.363 | Spliceosome                                                                                                                                    |
| novel_mir151 | CL12266.Contig2_All | -1.363 | Spliceosome                                                                                                                                    |
| novel_mir151 | CL11930.Contig3_All | -1.363 | Other types of O-glycan biosynthesis, Glycerophospholipid metabolism, Ether lipid metabolism, Inositol phosphate metabolism                    |

|              |                     |        |                                                                                                                            |
|--------------|---------------------|--------|----------------------------------------------------------------------------------------------------------------------------|
| novel_mir151 | CL11286.Contig5_All | -1.363 | Glucosinolate biosynthesis, Cyanoamino acid metabolism, 2-Oxocarboxylic acid metabolism, Plant hormone signal transduction |
| novel_mir172 | Unigene9713_All     | -1.312 | Oxidative phosphorylation, Photosynthesis;                                                                                 |
| novel_mir172 | CL947.Contig1_All   | -1.312 | Oxidative phosphorylation, Photosynthesis;                                                                                 |
| novel_mir138 | CL1673.Contig5_All  | -1.187 | Linoleic acid metabolism, alpha-Linolenic acid metabolism                                                                  |
